# Supplementary material
Source: HighWire-hosted journal article supplement (https://gut.bmj.com/content/68/3/512)
Supplement: inline-supplementary-material-1 [file inline-supplementary-material-1.pdf]

## Supplementary Appendix

This appendix has been provided by the authors to give readers additional information about their work.  
Supplement to: Prevalence and burden of hepatitis D virus infection in the global population: a systematic review and meta-analysis

**Prevalence and burden of hepatitis D virus infection in the global population: a  
systematic review and meta-analysis**

***Supplemental Materials***

**Table of Contents**

**Figure S1.** Forest plot of estimated pooled seroprevalence of hepatitis D virus among general individuals

**Figure S2.** Forest plot showing meta-analysis of HDV seroprevalence among HBsAg carriers (A) and patients with liver disease (B)

**Figure S3.** Global hepatitis D virus prevalence (1977-1996, 1997-2016)

**Figure S4.** Forest plot of estimated global hepatitis D virus prevalence (1977-1996, 1997-2016)

**Figure S5.** The relationship between HBV vaccine coverage rate and HDV prevalence

**Table S1.** Prevalence of anti-hepatitis D virus in HBsAg-positive populations by global burden of infected regions

**Table S2.** Data about HBV vaccine coverage rate and HDV prevalence

**Table S3.** Data about global hepatitis D virus prevalence (1977-1996, 1997-2016)

**Table S4.** Immunization coverage estimates by country

**Table S5.** Distribution of hepatitis D virus genotypes in different countries and regions

**Table S6.** The HDV prevalence in general individuals with different SDI levels

**Table S7.** Sensitive analysis in HBsAg positive populations

**Table S8.** Methods for anti-HDV antibody used in included studies

**Table S9:** Citations for all sources used for estimating the prevalence of HDV in general population and HBV population

**References.**

## Data Sources

We systematically searched PubMed, Embase, Cochrane Library, CNKI to identify studies providing national or local representative estimates of HDV prevalence.

1. The search for adults was conducted using the following terms:

((((HBV[Title/Abstract] OR "Hepatitis B"[Mesh])) AND (("Hepatitis Delta Virus"[Mesh] OR HDV[Title/Abstract])) AND (((((((((((prevalen\*[Title/Abstract] OR inciden\*[Title/Abstract] OR seroprevalen\*[Title/Abstract] OR screening[Title/Abstract] OR surveillance[Title/Abstract] OR population\*[Title/Abstract] OR survey\*[Title/Abstract] OR epidem\*[Title/Abstract] OR data collection[Title/Abstract] OR population sample\*[Title/Abstract] OR community survey\*[Title/Abstract] OR cohort[Title/Abstract] OR cross-sectional[Title/Abstract] OR longitude\*[Title/Abstract] OR follow-up[Title/Abstract]) AND (Humans[Mesh])

Our search returned 2717 records, 182 of which were finally included in the analysis after meeting the inclusion and exclusion criteria.

2. The search for genotypes was conducted using the following terms:

((("Hepatitis Delta Virus"[Mesh] OR HDV[Title/Abstract])) AND ((genotype[Mesh] OR genotypes OR genogroup OR genogroups)

Our search returned 352 records, 81 of which were finally included in the analysis after meeting the inclusion and exclusion criteria.

## Study selection criteria

### Topic 1: prevalence of HDV infection

Study population:

General population: Blood donors

Antenatal clinic attendees/health-care workers

Pregnant women

High risk: Intravenous drug users

MSM (men who have sex with men)

Sex workers

Study populations selected based on a risk factor for viral hepatitis or on a condition associated with hepatitis infection or risk of hepatitis transmission (persons with liver disease, injecting and non-injecting drug users, sex-workers, people who have sex with men, hospitalized patients...)

Study inclusion criteria:

- Provide data about prevalence rate of hepatitis D virus infection

Study exclusion criteria:

- Reports
- Case studies
- Letters
- Perspectives, correspondence, abstract

- No primary data
- Other comorbidities (e.g. HIV, Thalassemia)
- Systematic reviews/meta-analyses
- Undergoing interventions that put them at increased risk of co-infection.
- Prevalence of HDV infection about migrants and refugees, children, all people who have liver cancer and liver cirrhosis

## **Topic 2: global distribution of HDV genotypes**

Study inclusion criteria:

- Provide data about genotypes

Study exclusion criteria:

- No information about nationality

## **HDV seroprevalence among HBsAg carriers and patients with liver disease**

We did a forest plot between HBsAg carriers and patients with liver disease. Results have been shown in Figure S2. In HBsAg carriers the prevalence of HDV was 7.78% (95% CI 6.16-9.54), while the prevalence was 12.60% (95% CI 10.16-15.26) in patients with liver disease. So patients with liver disease have a higher prevalence than HBsAg carriers.

## **Relationship between HBV vaccine coverage rate and HDV prevalence**

There is a definite correlation between HBV vaccine coverage rate and HDV prevalence. One study has been ignored, for the reason of lacking exact year about vaccine. The downward trend will be more obvious if the extreme value of Gabon was excluded.

## **Prevalence of anti-hepatitis D virus in HBsAg-positive populations by global burden of infected regions**

IVDU = intravenous drug users. HRSB = people who have high-risk sexual behaviors. Mixed population = HBsAg carriers (without IVDU and HRSB). “Multicenter” means we had difficulty in deciding which country or location it belongs to. Group 1 represents populations came from Africa, group 2 represents populations came from North America, group 3 represents populations came from South America, group 4 represents populations came from Asia, group 5 represents populations came from Europe, group 6 represents populations came from Oceania, multicenter represents individuals came from several continents.

## **SDI level affects the prevalence of HDV.**

Forest plot in general population about SDI level can be seen in Fig.2B. Several locations or countries did not have published SDI level: Nauru, Palau, Tuvalu. Data can be seen in Table S4 in detail.

## **Sensitive analysis in HBsAg positive populations**

In the context of sensitivity analysis, involves fitting a linear regression to the model response and using standardized regression coefficients as direct measures of sensitivity. The regression is required to be linear with respect to the data because otherwise it is difficult to interpret the standardized coefficients. This method is therefore most suitable when the model response is in fact linear; linearity can be confirmed, for instance, if the coefficient of determination is large. The advantages of regression

analysis are that it is simple and has a low computational cost.

**Figure S1: Forest plot of estimated pooled seroprevalence of hepatitis D virus among general individuals.**

Data are from a random-effects model.

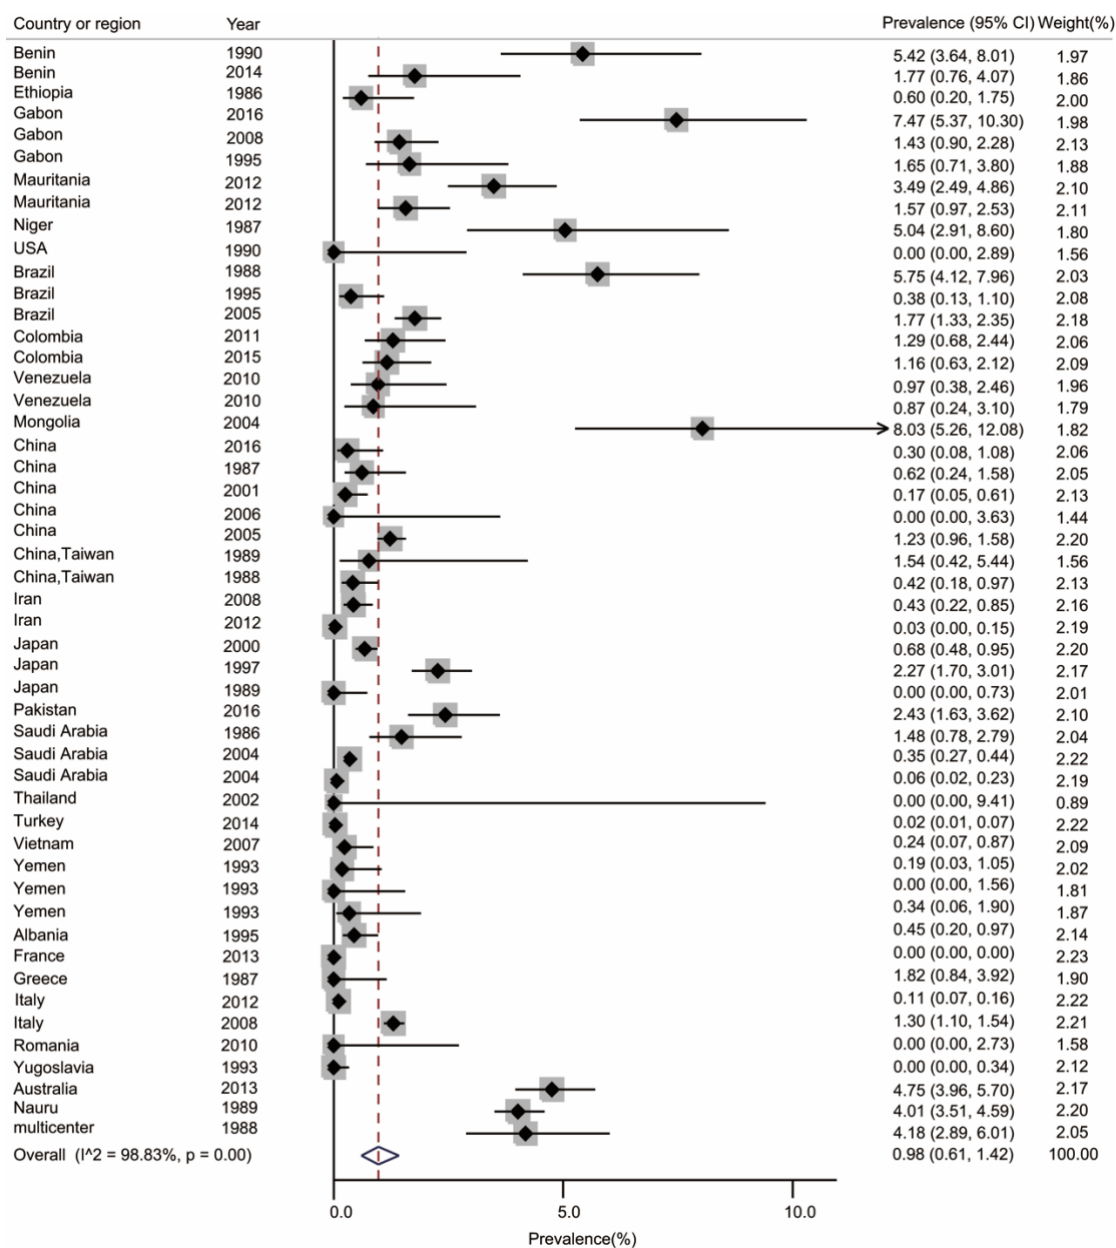

Figure S2. Forest plot showing meta-analysis of HDV seroprevalence among HBsAg carriers (A) and patients with liver disease (B) Weights are from random effects analysis.

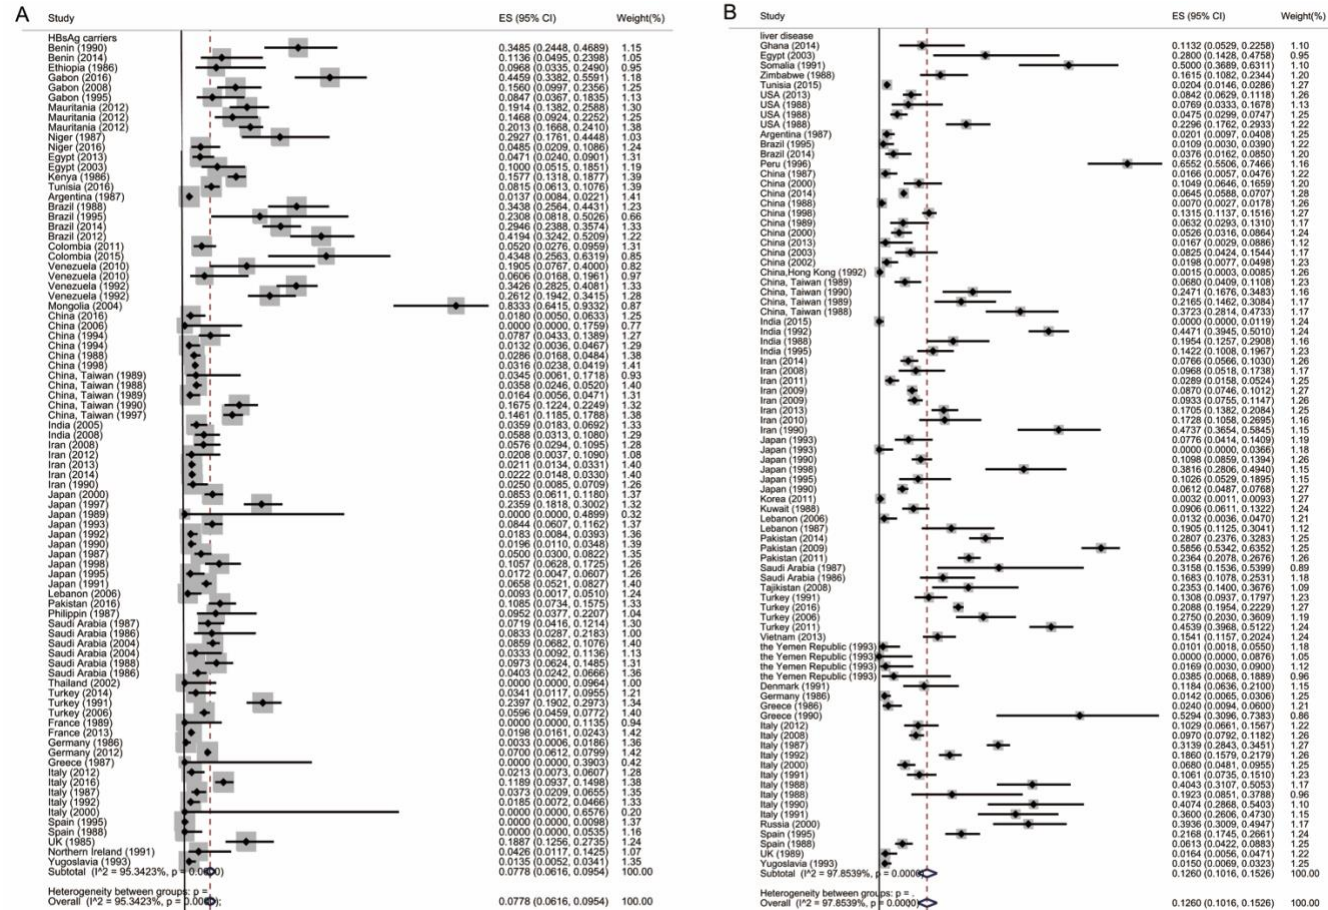

Figure S3: Global hepatitis D virus prevalence (1977-1996, 1997-2016)

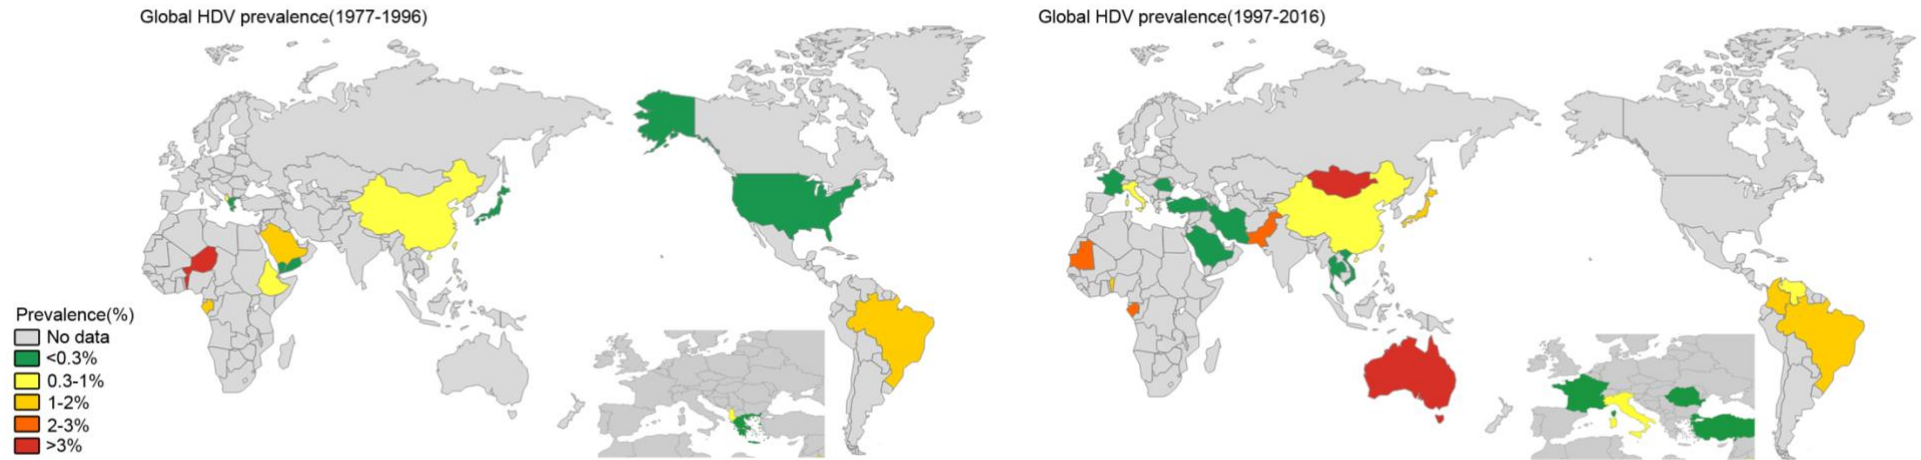



Figure S4. Forest plot of estimated global hepatitis D virus prevalence (1977-1996, 1997-2016)

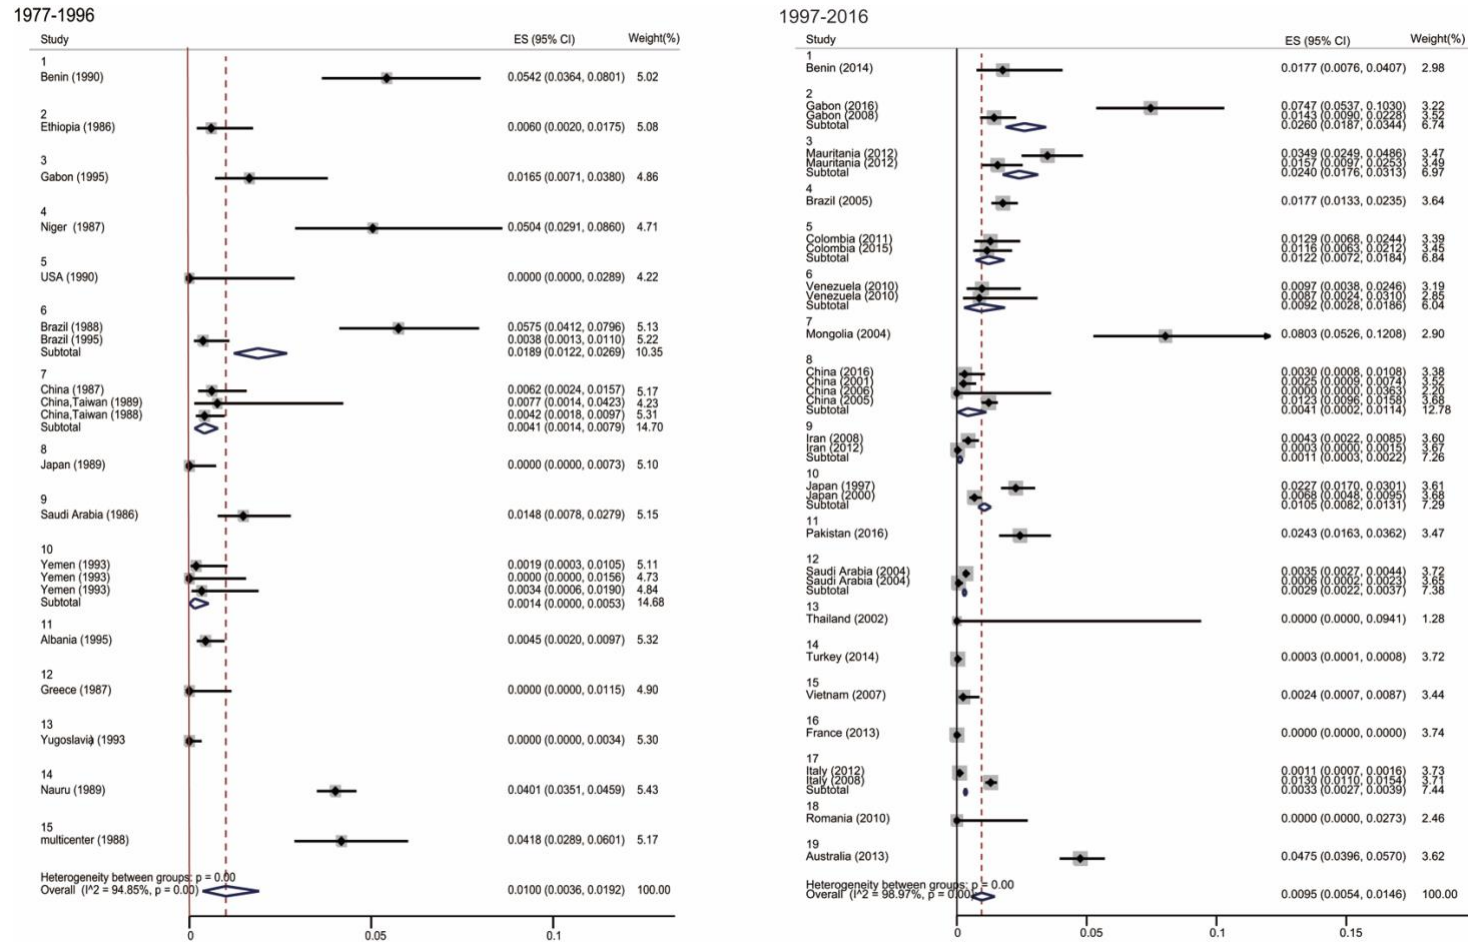

Figure S5: The relationship between HBV vaccine coverage rate and HDV prevalence

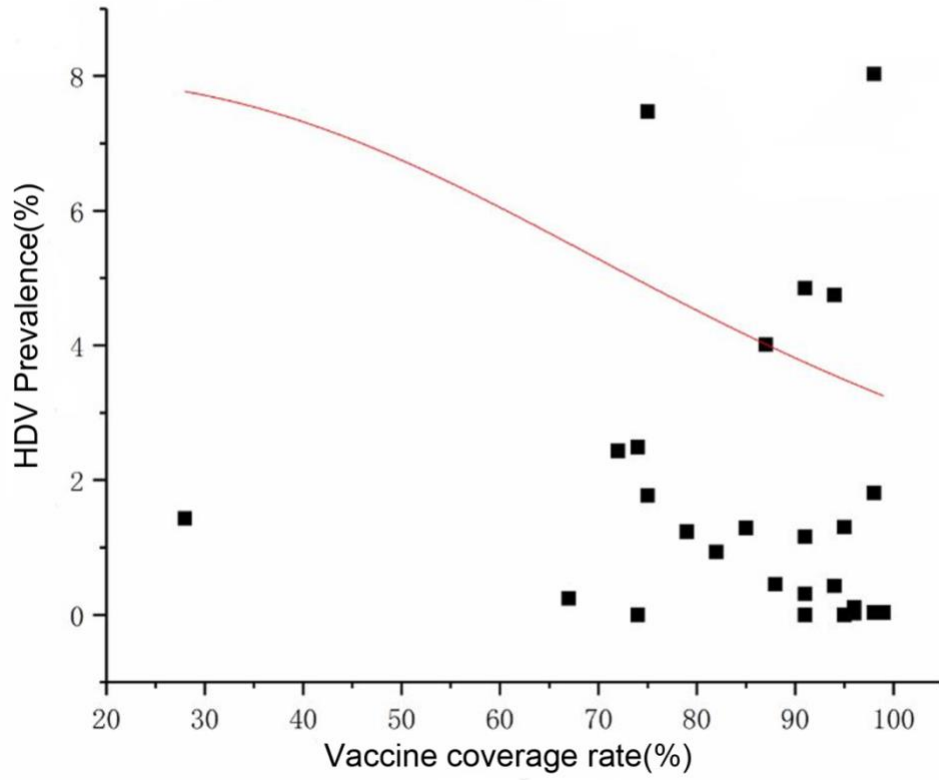

**Table S1: Prevalence of anti-hepatitis D virus in HBsAg-positive populations by global burden of infected regions**

| Location   | Year | e   | n    | Group | Subgroup         | _ES    | _seES  | _LCI   | _UCI   | _WT    |
|------------|------|-----|------|-------|------------------|--------|--------|--------|--------|--------|
| Benin      | 1990 | 23  | 66   | 1     | Mixed population | 0.3485 | 0.1226 | 0.2448 | 0.4689 | 0.4064 |
| Benin      | 2014 | 5   | 44   | 1     | Mixed population | 0.1136 | 0.1499 | 0.0495 | 0.2398 | 0.3849 |
| Ethiopia   | 1986 | 3   | 31   | 1     | Mixed population | 0.0968 | 0.1782 | 0.0335 | 0.2490 | 0.3610 |
| Gabon      | 2016 | 33  | 74   | 1     | Mixed population | 0.4459 | 0.1159 | 0.3382 | 0.5591 | 0.4114 |
| Gabon      | 2008 | 17  | 109  | 1     | Mixed population | 0.1560 | 0.0956 | 0.0997 | 0.2356 | 0.4253 |
| Gabon      | 1995 | 5   | 59   | 1     | Mixed population | 0.0847 | 0.1296 | 0.0367 | 0.1835 | 0.4011 |
| Ghana      | 2014 | 6   | 53   | 1     | Mixed population | 0.1132 | 0.1367 | 0.0529 | 0.2258 | 0.3955 |
| Mauritania | 2012 | 31  | 162  | 1     | Mixed population | 0.1914 | 0.0784 | 0.1382 | 0.2588 | 0.4356 |
| Mauritania | 2012 | 16  | 109  | 1     | Mixed population | 0.1468 | 0.0956 | 0.0924 | 0.2252 | 0.4253 |
| Mauritania | 2012 | 90  | 447  | 1     | Mixed population | 0.2013 | 0.0473 | 0.1668 | 0.2410 | 0.4498 |
| Niger      | 1987 | 12  | 41   | 1     | Mixed population | 0.2927 | 0.1552 | 0.1761 | 0.4448 | 0.3805 |
| Niger      | 2016 | 5   | 103  | 1     | Mixed population | 0.0485 | 0.0983 | 0.0209 | 0.1086 | 0.4236 |
| Egypt      | 2013 | 8   | 170  | 1     | Mixed population | 0.0471 | 0.0766 | 0.0240 | 0.0901 | 0.4366 |
| Egypt      | 2003 | 15  | 75   | 1     | Mixed population | 0.2000 | 0.1151 | 0.1251 | 0.3041 | 0.4120 |
| Kenya      | 1986 | 103 | 653  | 1     | Mixed population | 0.1577 | 0.0391 | 0.1318 | 0.1877 | 0.4525 |
| Somalia    | 1991 | 26  | 52   | 1     | Mixed population | 0.5000 | 0.1380 | 0.3689 | 0.6311 | 0.3945 |
| Zimbabwe   | 1988 | 21  | 130  | 1     | Mixed population | 0.1615 | 0.0875 | 0.1082 | 0.2344 | 0.4303 |
| Tunisia    | 2016 | 44  | 540  | 1     | Mixed population | 0.0815 | 0.0430 | 0.0613 | 0.1076 | 0.4512 |
| Tunisia    | 2015 | 33  | 1615 | 1     | Mixed population | 0.0204 | 0.0249 | 0.0146 | 0.0286 | 0.4559 |
| Canada     | 1986 | 0   | 186  | 2     | Mixed population | 0.0000 | 0.0732 | 0.0000 | 0.0202 | 0.4384 |
| USA        | 1990 | 0   | 10   | 2     | Mixed population | 0.0000 | 0.3086 | 0.0000 | 0.2775 | 0.2534 |
| USA        | 2013 | 42  | 499  | 2     | Mixed population | 0.0842 | 0.0447 | 0.0629 | 0.1118 | 0.4507 |
| USA        | 1988 | 5   | 65   | 2     | Mixed population | 0.0769 | 0.1236 | 0.0333 | 0.1678 | 0.4057 |
| USA        | 1988 | 17  | 358  | 2     | Mixed population | 0.0475 | 0.0528 | 0.0299 | 0.0747 | 0.4477 |
| USA        | 1988 | 45  | 196  | 2     | Mixed population | 0.2296 | 0.0713 | 0.1762 | 0.2933 | 0.4393 |
| USA        | 2015 | 73  | 2175 | 2     | Mixed population | 0.0336 | 0.0214 | 0.0268 | 0.0420 | 0.4566 |
| Argentina  | 1987 | 23  | 1517 | 3     | Mixed population | 0.0152 | 0.0257 | 0.0101 | 0.0226 | 0.4558 |
| Brazil     | 1988 | 33  | 96   | 3     | Mixed population | 0.3438 | 0.1018 | 0.2564 | 0.4431 | 0.4213 |
| Brazil     | 1995 | 3   | 13   | 3     | Mixed population | 0.2308 | 0.2722 | 0.0818 | 0.5026 | 0.2814 |

|                  |      |     |      |   |                  |        |        |        |        |        |
|------------------|------|-----|------|---|------------------|--------|--------|--------|--------|--------|
| Brazil           | 2014 | 66  | 224  | 3 | Mixed population | 0.2946 | 0.0667 | 0.2388 | 0.3574 | 0.4416 |
| Brazil           | 2012 | 39  | 93   | 3 | Mixed population | 0.4194 | 0.1034 | 0.3242 | 0.5209 | 0.4202 |
| Brazil           | 2014 | 5   | 133  | 3 | Mixed population | 0.0376 | 0.0865 | 0.0162 | 0.0850 | 0.4309 |
| Brazil           | 2016 | 8   | 92   | 3 | Mixed population | 0.0870 | 0.1040 | 0.0447 | 0.1623 | 0.4198 |
| Colombia         | 2011 | 9   | 173  | 3 | Mixed population | 0.0520 | 0.0759 | 0.0276 | 0.0959 | 0.4369 |
| Colombia         | 2015 | 10  | 23   | 3 | Mixed population | 0.4348 | 0.2063 | 0.2563 | 0.6319 | 0.3367 |
| Peru             | 1996 | 57  | 87   | 3 | Mixed population | 0.6552 | 0.1069 | 0.5506 | 0.7466 | 0.4178 |
| Venezuela        | 2010 | 4   | 21   | 3 | Mixed population | 0.1905 | 0.2157 | 0.0767 | 0.4000 | 0.3286 |
| Venezuela        | 2010 | 2   | 33   | 3 | Mixed population | 0.0606 | 0.1728 | 0.0168 | 0.1961 | 0.3656 |
| Venezuela        | 1992 | 74  | 216  | 3 | Mixed population | 0.3426 | 0.0680 | 0.2825 | 0.4081 | 0.4410 |
| Venezuela        | 1992 | 35  | 134  | 3 | Mixed population | 0.2612 | 0.0862 | 0.1942 | 0.3415 | 0.4311 |
| Mongolia         | 2004 | 20  | 24   | 4 | Mixed population | 0.8333 | 0.2020 | 0.6415 | 0.9332 | 0.3404 |
| China            | 2016 | 2   | 111  | 4 | Mixed population | 0.0180 | 0.0947 | 0.0050 | 0.0633 | 0.4259 |
| China            | 1987 | 4   | 515  | 4 | Mixed population | 0.0078 | 0.0440 | 0.0030 | 0.0198 | 0.4509 |
| China            | 2001 | 3   | 149  | 4 | Mixed population | 0.0201 | 0.0818 | 0.0069 | 0.0575 | 0.4337 |
| China            | 2006 | 0   | 18   | 4 | Mixed population | 0.0000 | 0.2325 | 0.0000 | 0.1759 | 0.3141 |
| China            | 2000 | 15  | 143  | 4 | Mixed population | 0.1049 | 0.0835 | 0.0646 | 0.1659 | 0.4327 |
| China            | 2014 | 426 | 6604 | 4 | Mixed population | 0.0645 | 0.0123 | 0.0588 | 0.0707 | 0.4577 |
| China            | 1994 | 10  | 127  | 4 | Mixed population | 0.0787 | 0.0886 | 0.0433 | 0.1389 | 0.4297 |
| China            | 1994 | 2   | 152  | 4 | Mixed population | 0.0132 | 0.0810 | 0.0036 | 0.0467 | 0.4342 |
| China            | 1988 | 17  | 1027 | 4 | Mixed population | 0.0166 | 0.0312 | 0.0104 | 0.0263 | 0.4546 |
| China            | 1998 | 207 | 2681 | 4 | Mixed population | 0.0772 | 0.0193 | 0.0677 | 0.0879 | 0.4569 |
| China            | 2012 | 18  | 1486 | 4 | Mixed population | 0.0121 | 0.0259 | 0.0077 | 0.0191 | 0.4557 |
| China            | 1989 | 6   | 95   | 4 | Mixed population | 0.0632 | 0.1023 | 0.0293 | 0.1310 | 0.4209 |
| China            | 2012 | 8   | 220  | 4 | Mixed population | 0.0364 | 0.0673 | 0.0185 | 0.0701 | 0.4413 |
| China            | 2000 | 14  | 266  | 4 | Mixed population | 0.0526 | 0.0613 | 0.0316 | 0.0864 | 0.4442 |
| China            | 2013 | 1   | 60   | 4 | Mixed population | 0.0167 | 0.1286 | 0.0029 | 0.0886 | 0.4019 |
| China            | 2003 | 8   | 97   | 4 | Mixed population | 0.0825 | 0.1013 | 0.0424 | 0.1544 | 0.4216 |
| China            | 2002 | 4   | 202  | 4 | Mixed population | 0.0198 | 0.0703 | 0.0077 | 0.0498 | 0.4399 |
| China            | 2000 | 16  | 124  | 4 | Mixed population | 0.1290 | 0.0896 | 0.0810 | 0.1994 | 0.4291 |
| China, Hong Kong | 1992 | 1   | 664  | 4 | Mixed population | 0.0015 | 0.0388 | 0.0003 | 0.0085 | 0.4525 |
| China, Taiwan    | 1989 | 1   | 29   | 4 | Mixed population | 0.0345 | 0.1841 | 0.0061 | 0.1718 | 0.3559 |
| China, Taiwan    | 1988 | 5   | 211  | 4 | Mixed population | 0.0237 | 0.0688 | 0.0102 | 0.0543 | 0.4406 |

|               |      |     |      |   |                  |        |        |        |        |        |
|---------------|------|-----|------|---|------------------|--------|--------|--------|--------|--------|
| China, Taiwan | 1988 | 26  | 726  | 4 | Mixed population | 0.0358 | 0.0371 | 0.0246 | 0.0520 | 0.4530 |
| China, Taiwan | 1989 | 17  | 389  | 4 | Mixed population | 0.0437 | 0.0507 | 0.0275 | 0.0689 | 0.4486 |
| China, Taiwan | 1989 | 1   | 61   | 4 | Mixed population | 0.0164 | 0.1275 | 0.0029 | 0.0872 | 0.4027 |
| China, Taiwan | 1990 | 21  | 85   | 4 | Mixed population | 0.2471 | 0.1081 | 0.1676 | 0.3483 | 0.4169 |
| China, Taiwan | 1989 | 21  | 97   | 4 | Mixed population | 0.2165 | 0.1013 | 0.1462 | 0.3084 | 0.4216 |
| China, Taiwan | 1988 | 35  | 94   | 4 | Mixed population | 0.3723 | 0.1029 | 0.2814 | 0.4733 | 0.4205 |
| China, Taiwan | 1990 | 34  | 203  | 4 | Mixed population | 0.1675 | 0.0701 | 0.1224 | 0.2249 | 0.4400 |
| China, Taiwan | 1997 | 77  | 527  | 4 | Mixed population | 0.1461 | 0.0435 | 0.1185 | 0.1788 | 0.4511 |
| India         | 2015 | 0   | 318  | 4 | Mixed population | 0.0000 | 0.0560 | 0.0000 | 0.0119 | 0.4464 |
| India         | 2005 | 8   | 223  | 4 | Mixed population | 0.0359 | 0.0669 | 0.0183 | 0.0692 | 0.4416 |
| India         | 2008 | 9   | 153  | 4 | Mixed population | 0.0588 | 0.0807 | 0.0313 | 0.1080 | 0.4343 |
| India         | 1992 | 148 | 331  | 4 | Mixed population | 0.4471 | 0.0549 | 0.3945 | 0.5010 | 0.4469 |
| India         | 1988 | 17  | 87   | 4 | Mixed population | 0.1954 | 0.1069 | 0.1257 | 0.2908 | 0.4178 |
| India         | 1995 | 29  | 204  | 4 | Mixed population | 0.1422 | 0.0699 | 0.1008 | 0.1967 | 0.4401 |
| Iran          | 2008 | 8   | 139  | 4 | Mixed population | 0.0576 | 0.0847 | 0.0294 | 0.1095 | 0.4320 |
| Iran          | 2012 | 1   | 48   | 4 | Mixed population | 0.0208 | 0.1436 | 0.0037 | 0.1090 | 0.3900 |
| Iran          | 2014 | 39  | 509  | 4 | Mixed population | 0.0766 | 0.0443 | 0.0566 | 0.1030 | 0.4508 |
| Iran          | 2013 | 18  | 854  | 4 | Mixed population | 0.0211 | 0.0342 | 0.0134 | 0.0331 | 0.4538 |
| Iran          | 2008 | 9   | 93   | 4 | Mixed population | 0.0968 | 0.1034 | 0.0518 | 0.1738 | 0.4202 |
| Iran          | 2011 | 10  | 346  | 4 | Mixed population | 0.0289 | 0.0537 | 0.0158 | 0.0524 | 0.4474 |
| Iran          | 2009 | 150 | 1725 | 4 | Mixed population | 0.0870 | 0.0241 | 0.0746 | 0.1012 | 0.4561 |
| Iran          | 2014 | 23  | 1038 | 4 | Mixed population | 0.0222 | 0.0310 | 0.0148 | 0.0330 | 0.4546 |
| Iran          | 2009 | 79  | 847  | 4 | Mixed population | 0.0933 | 0.0344 | 0.0755 | 0.1147 | 0.4538 |
| Iran          | 2013 | 75  | 440  | 4 | Mixed population | 0.1705 | 0.0476 | 0.1382 | 0.2084 | 0.4497 |
| Iran          | 2010 | 14  | 81   | 4 | Mixed population | 0.1728 | 0.1108 | 0.1058 | 0.2695 | 0.4151 |
| Iran          | 1990 | 3   | 120  | 4 | Mixed population | 0.0250 | 0.0911 | 0.0085 | 0.0709 | 0.4282 |
| Japan         | 2000 | 32  | 375  | 4 | Mixed population | 0.0853 | 0.0516 | 0.0611 | 0.1180 | 0.4482 |
| Japan         | 1997 | 46  | 195  | 4 | Mixed population | 0.2359 | 0.0715 | 0.1818 | 0.3002 | 0.4393 |
| Japan         | 1989 | 0   | 4    | 4 | Mixed population | 0.0000 | 0.4714 | 0.0000 | 0.4899 | 0.1588 |
| Japan         | 1993 | 42  | 507  | 4 | Mixed population | 0.0828 | 0.0444 | 0.0619 | 0.1101 | 0.4508 |
| Japan         | 1993 | 0   | 101  | 4 | Mixed population | 0.0000 | 0.0993 | 0.0000 | 0.0366 | 0.4229 |
| Japan         | 1992 | 6   | 328  | 4 | Mixed population | 0.0183 | 0.0552 | 0.0084 | 0.0393 | 0.4468 |
| Japan         | 1990 | 69  | 1088 | 4 | Mixed population | 0.0634 | 0.0303 | 0.0504 | 0.0795 | 0.4548 |

|              |      |      |      |   |                  |        |        |        |        |        |
|--------------|------|------|------|---|------------------|--------|--------|--------|--------|--------|
| Japan        | 1987 | 14   | 280  | 4 | Mixed population | 0.0500 | 0.0597 | 0.0300 | 0.0822 | 0.4449 |
| Japan        | 1998 | 42   | 199  | 4 | Mixed population | 0.2111 | 0.0708 | 0.1601 | 0.2729 | 0.4396 |
| Japan        | 1995 | 10   | 194  | 4 | Mixed population | 0.0515 | 0.0717 | 0.0282 | 0.0923 | 0.4392 |
| Japan        | 1991 | 67   | 1019 | 4 | Mixed population | 0.0658 | 0.0313 | 0.0521 | 0.0827 | 0.4545 |
| Japan        | 1990 | 69   | 1127 | 4 | Mixed population | 0.0612 | 0.0298 | 0.0487 | 0.0768 | 0.4549 |
| Korea        | 2011 | 3    | 940  | 4 | Mixed population | 0.0032 | 0.0326 | 0.0011 | 0.0093 | 0.4542 |
| Kuwait       | 1988 | 23   | 254  | 4 | Mixed population | 0.0906 | 0.0627 | 0.0611 | 0.1322 | 0.4435 |
| Lebanon      | 2006 | 3    | 258  | 4 | Mixed population | 0.0116 | 0.0622 | 0.0040 | 0.0336 | 0.4438 |
| Lebanon      | 1987 | 12   | 63   | 4 | Mixed population | 0.1905 | 0.1255 | 0.1125 | 0.3041 | 0.4043 |
| Pakistan     | 2016 | 23   | 212  | 4 | Mixed population | 0.1085 | 0.0686 | 0.0734 | 0.1575 | 0.4407 |
| Pakistan     | 2014 | 105  | 374  | 4 | Mixed population | 0.2807 | 0.0517 | 0.2376 | 0.3283 | 0.4482 |
| Pakistan     | 2009 | 212  | 362  | 4 | Mixed population | 0.5856 | 0.0525 | 0.5342 | 0.6352 | 0.4478 |
| Pakistan     | 2005 | 1444 | 8721 | 4 | Mixed population | 0.1656 | 0.0107 | 0.1579 | 0.1735 | 0.4579 |
| Pakistan     | 2011 | 183  | 774  | 4 | Mixed population | 0.2364 | 0.0359 | 0.2078 | 0.2676 | 0.4534 |
| Pakistan     | 2011 | 53   | 190  | 4 | Mixed population | 0.2789 | 0.0725 | 0.2200 | 0.3466 | 0.4388 |
| Pakistan     | 2010 | 80   | 96   | 4 | Mixed population | 0.8333 | 0.1018 | 0.7463 | 0.8947 | 0.4213 |
| Philippine   | 1987 | 4    | 42   | 4 | Mixed population | 0.0952 | 0.1534 | 0.0377 | 0.2207 | 0.3820 |
| Saudi Arabia | 1987 | 18   | 186  | 4 | Mixed population | 0.0968 | 0.0732 | 0.0621 | 0.1478 | 0.4384 |
| Saudi Arabia | 1986 | 3    | 36   | 4 | Mixed population | 0.0833 | 0.1655 | 0.0287 | 0.2183 | 0.3718 |
| Saudi Arabia | 2004 | 67   | 780  | 4 | Mixed population | 0.0859 | 0.0358 | 0.0682 | 0.1076 | 0.4534 |
| Saudi Arabia | 2004 | 2    | 60   | 4 | Mixed population | 0.0333 | 0.1286 | 0.0092 | 0.1136 | 0.4019 |
| Saudi Arabia | 1988 | 18   | 185  | 4 | Mixed population | 0.0973 | 0.0734 | 0.0624 | 0.1485 | 0.4383 |
| Saudi Arabia | 1986 | 31   | 448  | 4 | Mixed population | 0.0692 | 0.0472 | 0.0492 | 0.0965 | 0.4498 |
| Tajikistan   | 2008 | 12   | 51   | 4 | Mixed population | 0.2353 | 0.1393 | 0.1400 | 0.3676 | 0.3935 |
| Thailand     | 2002 | 0    | 36   | 4 | Mixed population | 0.0000 | 0.1655 | 0.0000 | 0.0964 | 0.3718 |
| Turkey       | 2014 | 3    | 88   | 4 | Mixed population | 0.0341 | 0.1063 | 0.0117 | 0.0955 | 0.4182 |
| Turkey       | 1991 | 89   | 479  | 4 | Mixed population | 0.1858 | 0.0457 | 0.1535 | 0.2231 | 0.4504 |
| Turkey       | 2016 | 700  | 3352 | 4 | Mixed population | 0.2088 | 0.0173 | 0.1954 | 0.2229 | 0.4572 |
| Turkey       | 2006 | 86   | 1009 | 4 | Mixed population | 0.0852 | 0.0315 | 0.0695 | 0.1041 | 0.4545 |
| Turkey       | 2012 | 79   | 3094 | 4 | Mixed population | 0.0255 | 0.0180 | 0.0205 | 0.0317 | 0.4571 |
| Turkey       | 2011 | 128  | 282  | 4 | Mixed population | 0.4539 | 0.0595 | 0.3968 | 0.5122 | 0.4450 |
| Vietnam      | 2007 | 2    | 159  | 4 | Mixed population | 0.0126 | 0.0792 | 0.0035 | 0.0447 | 0.4352 |
| Vietnam      | 2013 | 41   | 266  | 4 | Mixed population | 0.1541 | 0.0613 | 0.1157 | 0.2024 | 0.4442 |

|                    |      |     |      |   |                  |        |        |        |        |        |
|--------------------|------|-----|------|---|------------------|--------|--------|--------|--------|--------|
| the Yemen Republic | 1993 | 1   | 99   | 4 | Mixed population | 0.0101 | 0.1003 | 0.0018 | 0.0550 | 0.4223 |
| the Yemen Republic | 1993 | 0   | 40   | 4 | Mixed population | 0.0000 | 0.1571 | 0.0000 | 0.0876 | 0.3789 |
| the Yemen Republic | 1993 | 1   | 59   | 4 | Mixed population | 0.0169 | 0.1296 | 0.0030 | 0.0900 | 0.4011 |
| the Yemen Republic | 1993 | 1   | 26   | 4 | Mixed population | 0.0385 | 0.1943 | 0.0068 | 0.1889 | 0.3471 |
| Albania            | 1995 | 6   | 97   | 5 | Mixed population | 0.0619 | 0.1013 | 0.0287 | 0.1284 | 0.4216 |
| Belgium            | 2013 | 29  | 757  | 5 | Mixed population | 0.0383 | 0.0363 | 0.0268 | 0.0545 | 0.4533 |
| Denmark            | 1991 | 9   | 76   | 5 | Mixed population | 0.1184 | 0.1143 | 0.0636 | 0.2100 | 0.4125 |
| France             | 1989 | 0   | 30   | 5 | Mixed population | 0.0000 | 0.1811 | 0.0000 | 0.1135 | 0.3585 |
| France             | 2013 | 89  | 4492 | 5 | Mixed population | 0.0198 | 0.0149 | 0.0161 | 0.0243 | 0.4575 |
| Germany            | 1986 | 7   | 724  | 5 | Mixed population | 0.0097 | 0.0372 | 0.0047 | 0.0198 | 0.4530 |
| Germany            | 2012 | 199 | 2844 | 5 | Mixed population | 0.0700 | 0.0187 | 0.0612 | 0.0799 | 0.4570 |
| Greece             | 1987 | 0   | 6    | 5 | Mixed population | 0.0000 | 0.3922 | 0.0000 | 0.3903 | 0.1987 |
| Greece             | 1986 | 4   | 167  | 5 | Mixed population | 0.0240 | 0.0773 | 0.0094 | 0.0600 | 0.4362 |
| Greece             | 1990 | 9   | 17   | 5 | Mixed population | 0.5294 | 0.2390 | 0.3096 | 0.7383 | 0.3086 |
| Italy              | 2012 | 24  | 488  | 5 | Mixed population | 0.0492 | 0.0452 | 0.0333 | 0.0721 | 0.4505 |
| Italy              | 2008 | 86  | 887  | 5 | Mixed population | 0.0970 | 0.0336 | 0.0792 | 0.1182 | 0.4540 |
| Italy              | 2016 | 61  | 513  | 5 | Mixed population | 0.1189 | 0.0441 | 0.0937 | 0.1498 | 0.4509 |
| Italy              | 1997 | 143 | 996  | 5 | Mixed population | 0.1436 | 0.0317 | 0.1232 | 0.1667 | 0.4545 |
| Italy              | 1992 | 364 | 1556 | 5 | Mixed population | 0.2339 | 0.0253 | 0.2136 | 0.2556 | 0.4558 |
| Italy              | 2000 | 69  | 834  | 5 | Mixed population | 0.0827 | 0.0346 | 0.0659 | 0.1034 | 0.4537 |
| Italy              | 1988 | 53  | 310  | 5 | Mixed population | 0.1710 | 0.0568 | 0.1331 | 0.2168 | 0.4461 |
| Italy              | 1988 | 5   | 63   | 5 | Mixed population | 0.0794 | 0.1255 | 0.0344 | 0.1727 | 0.4043 |
| Italy              | 1991 | 26  | 245  | 5 | Mixed population | 0.1061 | 0.0638 | 0.0735 | 0.1510 | 0.4430 |
| Italy              | 1988 | 38  | 94   | 5 | Mixed population | 0.4043 | 0.1029 | 0.3107 | 0.5053 | 0.4205 |
| Italy              | 1988 | 5   | 26   | 5 | Mixed population | 0.1923 | 0.1943 | 0.0851 | 0.3788 | 0.3471 |
| Italy              | 1991 | 59  | 226  | 5 | Mixed population | 0.2611 | 0.0664 | 0.2081 | 0.3220 | 0.4418 |
| Italy              | 1990 | 22  | 54   | 5 | Mixed population | 0.4074 | 0.1355 | 0.2868 | 0.5403 | 0.3965 |
| Italy              | 1991 | 27  | 75   | 5 | Mixed population | 0.3600 | 0.1151 | 0.2606 | 0.4730 | 0.4120 |
| Norway             | 1986 | 0   | 113  | 5 | Mixed population | 0.0000 | 0.0939 | 0.0000 | 0.0329 | 0.4264 |
| Portugal           | 2016 | 86  | 2071 | 5 | Mixed population | 0.0415 | 0.0220 | 0.0337 | 0.0510 | 0.4565 |
| Romania            | 2010 | 0   | 3    | 5 | Mixed population | 0.0000 | 0.5345 | 0.0000 | 0.5615 | 0.1338 |
| Romania            | 2015 | 639 | 2761 | 5 | Mixed population | 0.2314 | 0.0190 | 0.2161 | 0.2475 | 0.4569 |
| Romania            | 2013 | 223 | 1094 | 5 | Mixed population | 0.2038 | 0.0302 | 0.1810 | 0.2287 | 0.4548 |

|                  |      |     |      |   |                  |        |        |        |        |        |
|------------------|------|-----|------|---|------------------|--------|--------|--------|--------|--------|
| Russia           | 2000 | 37  | 94   | 5 | Mixed population | 0.3936 | 0.1029 | 0.3009 | 0.4947 | 0.4205 |
| Spain            | 1995 | 8   | 622  | 5 | Mixed population | 0.0129 | 0.0401 | 0.0065 | 0.0252 | 0.4522 |
| Spain            | 1988 | 26  | 424  | 5 | Mixed population | 0.0613 | 0.0485 | 0.0422 | 0.0883 | 0.4493 |
| Spain            | 1988 | 0   | 68   | 5 | Mixed population | 0.0000 | 0.1208 | 0.0000 | 0.0535 | 0.4078 |
| UK               | 2015 | 67  | 168  | 5 | Mixed population | 0.3988 | 0.0770 | 0.3278 | 0.4743 | 0.4363 |
| UK               | 2015 | 158 | 3543 | 5 | Mixed population | 0.0446 | 0.0168 | 0.0383 | 0.0519 | 0.4572 |
| UK               | 2013 | 33  | 1048 | 5 | Mixed population | 0.0315 | 0.0309 | 0.0225 | 0.0439 | 0.4547 |
| UK               | 1985 | 20  | 106  | 5 | Mixed population | 0.1887 | 0.0969 | 0.1256 | 0.2735 | 0.4245 |
| UK               | 2007 | 82  | 962  | 5 | Mixed population | 0.0852 | 0.0322 | 0.0692 | 0.1046 | 0.4543 |
| Northern Ireland | 1991 | 2   | 47   | 5 | Mixed population | 0.0426 | 0.1451 | 0.0117 | 0.1425 | 0.3888 |
| UK               | 1989 | 3   | 183  | 5 | Mixed population | 0.0164 | 0.0738 | 0.0056 | 0.0471 | 0.4381 |
| Yugoslavia       | 1993 | 6   | 401  | 5 | Mixed population | 0.0150 | 0.0499 | 0.0069 | 0.0323 | 0.4488 |
| Yugoslavia       | 1993 | 4   | 297  | 5 | Mixed population | 0.0135 | 0.0580 | 0.0052 | 0.0341 | 0.4456 |
| Kiribati         | 1989 | 90  | 130  | 6 | Mixed population | 0.6923 | 0.0875 | 0.6084 | 0.7652 | 0.4303 |
| Nauru            | 1989 | 202 | 890  | 6 | Mixed population | 0.2270 | 0.0335 | 0.2007 | 0.2556 | 0.4540 |
| multicenter      | 1988 | 19  | 58   |   | Mixed population | 0.3276 | 0.1307 | 0.2208 | 0.4558 | 0.4002 |
| USA              | 1995 | 0   | 12   | 2 | IVDU             | 0.0000 | 0.2828 | 0.0000 | 0.2425 | 0.2729 |
| USA              | 1988 | 1   | 16   | 2 | IVDU             | 0.0625 | 0.2462 | 0.0111 | 0.2833 | 0.3026 |
| USA              | 1988 | 12  | 160  | 2 | IVDU             | 0.0750 | 0.0789 | 0.0434 | 0.1265 | 0.4353 |
| USA              | 1988 | 27  | 37   | 2 | IVDU             | 0.7297 | 0.1633 | 0.5702 | 0.8460 | 0.3737 |
| USA              | 2005 | 20  | 58   | 2 | IVDU             | 0.3448 | 0.1307 | 0.2356 | 0.4733 | 0.4002 |
| USA              | 1990 | 12  | 101  | 2 | IVDU             | 0.1188 | 0.0993 | 0.0693 | 0.1963 | 0.4229 |
| Brazil           | 1999 | 0   | 8    | 3 | IVDU             | 0.0000 | 0.3430 | 0.0000 | 0.3244 | 0.2293 |
| China            | 2016 | 59  | 226  | 4 | IVDU             | 0.2611 | 0.0664 | 0.2081 | 0.3220 | 0.4418 |
| China            | 2006 | 9   | 148  | 4 | IVDU             | 0.0608 | 0.0821 | 0.0323 | 0.1115 | 0.4335 |
| China, Hong Kong | 1992 | 13  | 14   | 4 | IVDU             | 0.9286 | 0.2626 | 0.6853 | 0.9873 | 0.2891 |
| China, Taiwan    | 1988 | 128 | 151  | 4 | IVDU             | 0.8477 | 0.0812 | 0.7818 | 0.8963 | 0.4340 |
| China, Taiwan    | 1989 | 6   | 7    | 4 | IVDU             | 0.8571 | 0.3651 | 0.4869 | 0.9743 | 0.2150 |
| China, Taiwan    | 1989 | 62  | 79   | 4 | IVDU             | 0.7848 | 0.1122 | 0.6821 | 0.8611 | 0.4141 |
| China, Taiwan    | 2002 | 144 | 368  | 4 | IVDU             | 0.3913 | 0.0521 | 0.3428 | 0.4420 | 0.4480 |
| China, Taiwan    | 1986 | 15  | 19   | 4 | IVDU             | 0.7895 | 0.2265 | 0.5667 | 0.9149 | 0.3193 |
| China, Taiwan    | 2003 | 15  | 19   | 4 | IVDU             | 0.7895 | 0.2265 | 0.5667 | 0.9149 | 0.3193 |
| China, Taiwan    | 2003 | 12  | 87   | 4 | IVDU             | 0.1379 | 0.1069 | 0.0807 | 0.2258 | 0.4178 |



|                  |      |     |     |   |      |        |        |        |        |        |
|------------------|------|-----|-----|---|------|--------|--------|--------|--------|--------|
| China, Taiwan    | 1990 | 119 | 131 | 4 | IVDU | 0.9084 | 0.0872 | 0.8467 | 0.9468 | 0.4305 |
| Iran             | 2008 | 4   | 14  | 4 | IVDU | 0.2857 | 0.2626 | 0.1172 | 0.5465 | 0.2891 |
| Japan            | 1989 | 0   | 4   | 4 | IVDU | 0.0000 | 0.4714 | 0.0000 | 0.4899 | 0.1588 |
| Malaysia         | 1994 | 15  | 44  | 4 | IVDU | 0.3409 | 0.1499 | 0.2188 | 0.4886 | 0.3849 |
| Thailand         | 2002 | 12  | 55  | 4 | IVDU | 0.2182 | 0.1342 | 0.1295 | 0.3437 | 0.3975 |
| Greece           | 1987 | 7   | 20  | 5 | IVDU | 0.3500 | 0.2209 | 0.1812 | 0.5671 | 0.3241 |
| Italy            | 2016 | 3   | 32  | 5 | IVDU | 0.0938 | 0.1754 | 0.0324 | 0.2422 | 0.3634 |
| Italy            | 1988 | 21  | 24  | 5 | IVDU | 0.8750 | 0.2020 | 0.6900 | 0.9566 | 0.3404 |
| Italy            | 1994 | 12  | 19  | 5 | IVDU | 0.6316 | 0.2265 | 0.4104 | 0.8085 | 0.3193 |
| Italy            | 1987 | 15  | 29  | 5 | IVDU | 0.5172 | 0.1841 | 0.3443 | 0.6861 | 0.3559 |
| Italy            | 1988 | 29  | 76  | 5 | IVDU | 0.3816 | 0.1143 | 0.2806 | 0.4940 | 0.4125 |
| Norway           | 1986 | 50  | 296 | 5 | IVDU | 0.1689 | 0.0581 | 0.1305 | 0.2158 | 0.4456 |
| Northern Ireland | 1991 | 1   | 20  | 5 | IVDU | 0.0500 | 0.2209 | 0.0089 | 0.2361 | 0.3241 |
| Poland           | 1992 | 16  | 69  | 5 | IVDU | 0.2319 | 0.1200 | 0.1481 | 0.3440 | 0.4084 |
| Romania          | 2015 | 8   | 26  | 5 | IVDU | 0.3077 | 0.1943 | 0.1650 | 0.4999 | 0.3471 |
| Romania          | 2015 | 179 | 699 | 5 | IVDU | 0.2561 | 0.0378 | 0.2251 | 0.2897 | 0.4528 |
| Romania          | 2015 | 166 | 654 | 5 | IVDU | 0.2538 | 0.0391 | 0.2220 | 0.2885 | 0.4525 |
| Spain            | 1988 | 170 | 262 | 5 | IVDU | 0.6489 | 0.0617 | 0.5893 | 0.7041 | 0.4440 |
| Spain            | 1995 | 59  | 74  | 5 | IVDU | 0.7973 | 0.1159 | 0.6921 | 0.8731 | 0.4114 |
| Yugoslavia       | 1993 | 49  | 130 | 5 | IVDU | 0.3769 | 0.0875 | 0.2983 | 0.4626 | 0.4303 |
| Yugoslavia       | 1993 | 5   | 7   | 5 | IVDU | 0.7143 | 0.3651 | 0.3589 | 0.9178 | 0.2150 |
| UK               | 1989 | 10  | 224 | 5 | IVDU | 0.0446 | 0.0667 | 0.0244 | 0.0802 | 0.4416 |
| UK               | 1989 | 11  | 54  | 5 | IVDU | 0.2037 | 0.1355 | 0.1177 | 0.3290 | 0.3965 |
| UK               | 1989 | 11  | 34  | 5 | IVDU | 0.3235 | 0.1703 | 0.1913 | 0.4916 | 0.3678 |
| UK               | 2013 | 5   | 22  | 5 | IVDU | 0.2273 | 0.2108 | 0.1012 | 0.4344 | 0.3327 |
| UK               | 1992 | 12  | 18  | 5 | IVDU | 0.6667 | 0.2325 | 0.4375 | 0.8372 | 0.3141 |
| Australia        | 1989 | 9   | 22  | 6 | IVDU | 0.4091 | 0.2108 | 0.2326 | 0.6127 | 0.3327 |
| USA              | 1989 | 8   | 321 | 2 | HRSB | 0.0249 | 0.0558 | 0.0127 | 0.0484 | 0.4465 |
| USA              | 1988 | 3   | 32  | 2 | HRSB | 0.0938 | 0.1754 | 0.0324 | 0.2422 | 0.3634 |
| USA              | 1988 | 1   | 67  | 2 | HRSB | 0.0149 | 0.1217 | 0.0026 | 0.0798 | 0.4071 |
| USA              | 1988 | 14  | 98  | 2 | HRSB | 0.1429 | 0.1008 | 0.0870 | 0.2256 | 0.4220 |
| USA              | 1988 | 23  | 298 | 2 | HRSB | 0.0772 | 0.0579 | 0.0520 | 0.1131 | 0.4457 |
| USA              | 1990 | 0   | 6   | 2 | HRSB | 0.0000 | 0.3922 | 0.0000 | 0.3903 | 0.1987 |

|               |      |    |     |   |      |        |        |        |        |        |
|---------------|------|----|-----|---|------|--------|--------|--------|--------|--------|
| China, Taiwan | 1997 | 14 | 136 | 4 | HRSB | 0.1029 | 0.0856 | 0.0623 | 0.1654 | 0.4315 |
| China, Taiwan | 1997 | 6  | 87  | 4 | HRSB | 0.0690 | 0.1069 | 0.0320 | 0.1424 | 0.4178 |
| China, Taiwan | 1997 | 30 | 55  | 4 | HRSB | 0.5455 | 0.1342 | 0.4152 | 0.6697 | 0.3975 |
| China, Taiwan | 1997 | 11 | 22  | 4 | HRSB | 0.5000 | 0.2108 | 0.3072 | 0.6928 | 0.3327 |
| China, Taiwan | 1997 | 13 | 36  | 4 | HRSB | 0.3611 | 0.1655 | 0.2248 | 0.5242 | 0.3718 |
| China, Taiwan | 1997 | 8  | 26  | 4 | HRSB | 0.3077 | 0.1943 | 0.1650 | 0.4999 | 0.3471 |
| China, Taiwan | 2003 | 24 | 41  | 4 | HRSB | 0.5854 | 0.1552 | 0.4337 | 0.7224 | 0.3805 |
| China, Taiwan | 2003 | 48 | 122 | 4 | HRSB | 0.3934 | 0.0904 | 0.3113 | 0.4821 | 0.4286 |
| China, Taiwan | 2003 | 19 | 48  | 4 | HRSB | 0.3958 | 0.1436 | 0.2702 | 0.5369 | 0.3900 |
| China, Taiwan | 2003 | 5  | 111 | 4 | HRSB | 0.0450 | 0.0947 | 0.0194 | 0.1011 | 0.4259 |
| China, Taiwan | 2003 | 0  | 15  | 4 | HRSB | 0.0000 | 0.2540 | 0.0000 | 0.2039 | 0.2961 |
| China, Taiwan | 2003 | 7  | 45  | 4 | HRSB | 0.1556 | 0.1482 | 0.0775 | 0.2878 | 0.3862 |
| France        | 1989 | 6  | 42  | 5 | HRSB | 0.1429 | 0.1534 | 0.0672 | 0.2784 | 0.3820 |
| Italy         | 1988 | 10 | 46  | 5 | HRSB | 0.2174 | 0.1466 | 0.1226 | 0.3557 | 0.3876 |
| Romania       | 2015 | 27 | 86  | 5 | HRSB | 0.3140 | 0.1075 | 0.2256 | 0.4182 | 0.4174 |
| Romania       | 2015 | 34 | 120 | 5 | HRSB | 0.2833 | 0.0911 | 0.2104 | 0.3697 | 0.4282 |
| Spain         | 1988 | 0  | 12  | 5 | HRSB | 0.0000 | 0.2828 | 0.0000 | 0.2425 | 0.2729 |
| Australia     | 1989 | 9  | 204 | 6 | HRSB | 0.0441 | 0.0699 | 0.0234 | 0.0817 | 0.4401 |

**Table S2: Data about HBV vaccine coverage rate and HDV prevalence**

| Country      | Year | Vaccine coverage (%) | HDV/all (%) |
|--------------|------|----------------------|-------------|
| Albania      | 1995 | 88                   | 0.45        |
| Australia    | 2009 | 94                   | 4.75        |
| Benin        | 2011 | 75                   | 1.77        |
| Brazil       | 2002 | 98                   | 1.81        |
| China        | 2004 | 79                   | 1.23        |
| China        | 2006 | 91                   | 0           |
| China        | 2016 | 99                   | 0.03        |
| Colombia     | 2011 | 85                   | 1.29        |
| Colombia     | 2015 | 91                   | 1.16        |
| France       | 2011 | 74                   | 0           |
| Gabon        | 2005 | 28                   | 1.43        |
| Gabon        | 2016 | 75                   | 7.47        |
| Iran         | 2005 | 94                   | 0.43        |
| Iran         | 2012 | 98                   | 0.03        |
| Italy        | 2001 | 95                   | 1.3         |
| Italy        | 2008 | 96                   | 0.11        |
| Mauritania   | 2008 | 74                   | 2.49        |
| Mongolia     | 2002 | 98                   | 8.03        |
| Nauru        | 2013 | 87                   | 4.01        |
| Pakistan     | 2013 | 72                   | 2.43        |
| Romania      | 2009 | 95                   | 0           |
| Saudi Arabia | 2004 | 91                   | 0.31        |
| Thailand     | 2002 | 95                   | 0           |
| Turkey       | 2011 | 96                   | 0.02        |
| USA          | 2013 | 91                   | 4.85        |
| Venezuela    | 2004 | 82                   | 0.93        |
| Vietnam      | 2002 | 67                   | 0.24        |

**Table S3. Data about global hepatitis D virus prevalence (1977-1996, 1997-2016)**

| 1977-1996     |      |     |          |          |                            |
|---------------|------|-----|----------|----------|----------------------------|
| Location      | Year | e   | n        | Subgroup |                            |
| Benin         | 1990 | 23  | 424      | 1        | general population         |
| Ethiopia      | 1986 | 3   | 500      | 2        | general population         |
| Gabon         | 1995 | 5   | 303      | 3        | general population         |
| Niger         | 1987 | 12  | 238      | 4        | general population         |
| USA           | 1990 | 0   | 129      | 5        | general population         |
| Brazil        | 1988 | 33  | 574      | 6        | general population         |
| Brazil        | 1995 | 3   | 798      | 6        | general population         |
| China         | 1987 | 4   | 649      | 7        | general population         |
| China, Taiwan | 1989 | 1   | 130      | 7        | general population         |
| China, Taiwan | 1988 | 5   | 1200     | 7        | general population         |
| Japan         | 1989 | 0   | 519      | 8        | general population         |
| Saudi Arabia  | 1986 | 9   | 608      | 9        | residents                  |
| Yemen         | 1993 | 1   | 537      | 10       | healthy                    |
| Yemen         | 1993 | 0   | 243      | 10       | pregnant                   |
| Yemen         | 1993 | 1   | 294      | 10       | blood                      |
| Albania       | 1995 | 6   | 1348     | 11       | general population         |
| Greece        | 1987 | 0   | 329      | 12       | general population         |
| Yugoslavia    | 1993 | 0   | 1140     | 13       | general population         |
| Nauru         | 1989 | 202 | 5032     | 14       | general population         |
| multicenter   | 1988 | 27  | 646      | 15       | general population         |
| 1997-2016     |      |     |          |          |                            |
| Location      | Year | e   | n        | Subgroup |                            |
| Benin         | 2014 | 5   | 283      | 1        | general population         |
| Gabon         | 2016 | 33  | 442      | 2        | general population         |
| Gabon         | 2008 | 17  | 1187     | 2        | general population         |
| Mauritania    | 2012 | 33  | 946      | 3        | patient                    |
| Mauritania    | 2012 | 16  | 1020     | 3        | pregnant                   |
| Brazil        | 2005 | 47  | 2656     | 4        | general population         |
| Colombia      | 2011 | 9   | 697      | 5        | general population         |
| Colombia      | 2015 | 10  | 861      | 5        | general population         |
| Venezuela     | 2010 | 4   | 414      | 6        | general population         |
| Venezuela     | 2010 | 2   | 231      | 6        | general population         |
| Mongolia      | 2004 | 20  | 249      | 7        | general population         |
| China         | 2016 | 2   | 672      | 8        | general population         |
| China         | 2001 | 3   | 1185     | 8        | general population         |
| China         | 2006 | 0   | 102      | 8        | controls                   |
| China         | 2005 | 60  | 4886     | 8        | general population         |
| Iran          | 2008 | 8   | 1850     | 9        | general population         |
| Iran          | 2012 | 1   | 3690     | 9        | general population         |
| Japan         | 1997 | 46  | 2028     | 10       | general population         |
| Japan         | 2000 | 32  | 4728     | 10       | general population         |
| Pakistan      | 2016 | 23  | 946      | 11       | general population         |
| Saudi Arabia  | 2004 | 67  | 19250    | 12       | hospital- and clinic-based |
| Saudi Arabia  | 2004 | 2   | 3147     | 12       | healthy blood donors       |
| Thailand      | 2002 | 0   | 37       | 13       | general population         |
| Turkey        | 2014 | 4   | 12423    | 14       | general population         |
| Vietnam       | 2007 | 2   | 837      | 15       | general population         |
| France        | 2013 | 123 | 39911011 | 16       | general population         |
| Italy         | 2012 | 24  | 22758    | 17       | general population         |
| Italy         | 2008 | 130 | 9997     | 17       | general population         |
| Romania       | 2010 | 0   | 137      | 18       | general population         |
| Australia     | 2013 | 110 | 2314     | 19       | general population         |

Table S4: Immunization coverage estimates by country

| Hepatitis B (HepB3) immunization coverage among 1-year-olds (%) |      |      |      |      |      |      |      |      |      |      |      |      |      |      |      |      |      |      |      |      |      |      |      |      |      |      |      |      |  |  |
|-----------------------------------------------------------------|------|------|------|------|------|------|------|------|------|------|------|------|------|------|------|------|------|------|------|------|------|------|------|------|------|------|------|------|--|--|
| Country                                                         | 2016 | 2015 | 2014 | 2013 | 2012 | 2011 | 2010 | 2009 | 2008 | 2007 | 2006 | 2005 | 2004 | 2003 | 2002 | 2001 | 2000 | 1999 | 1998 | 1997 | 1996 | 1995 | 1994 | 1993 | 1992 | 1991 | 1990 | 1989 |  |  |
| Afghanistan                                                     | 65   | 65   | 62   | 64   | 67   | 68   | 66   | 63   | 64   | 63   |      |      |      |      |      |      |      |      |      |      |      |      |      |      |      |      |      |      |  |  |
| Albania                                                         | 98   | 99   | 98   | 99   | 99   | 99   | 99   | 98   | 99   | 98   | 98   | 98   | 99   | 97   | 96   | 96   | 96   | 96   | 94   | 97   | 96   | 88   | 99   |      |      |      |      |      |  |  |
| Algeria                                                         | 91   | 95   | 95   | 95   | 95   | 95   | 95   | 94   | 91   | 90   | 80   | 83   | 81   |      |      |      |      |      |      |      |      |      |      |      |      |      |      |      |  |  |
| Andorra                                                         | 94   | 94   | 96   | 94   | 97   | 99   | 96   | 96   | 94   | 91   | 84   | 79   | 77   | 81   | 84   | 84   | 84   | 75   | 80   | 75   |      |      |      |      |      |      |      |      |  |  |
| Angola                                                          | 64   | 64   | 64   | 77   | 75   | 72   | 77   | 61   | 69   | 73   |      |      |      |      |      |      |      |      |      |      |      |      |      |      |      |      |      |      |  |  |
| Antigua and Barbuda                                             | 99   | 99   | 99   | 99   | 98   | 99   | 98   | 98   | 98   | 97   | 99   | 99   | 97   | 99   | 99   | 96   |      |      |      |      |      |      |      |      |      |      |      |      |  |  |
| Argentina                                                       | 92   | 94   | 94   | 94   | 91   | 91   | 94   | 94   | 90   | 85   | 84   | 88   | 81   | 73   | 66   |      |      |      |      |      |      |      |      |      |      |      |      |      |  |  |
| Armenia                                                         | 94   | 94   | 93   | 95   | 95   | 95   | 94   | 93   | 89   | 85   | 78   | 91   | 91   | 93   | 91   | 69   | 55   |      |      |      |      |      |      |      |      |      |      |      |  |  |
| Australia                                                       | 94   | 93   | 91   | 91   | 91   | 92   | 92   | 94   | 94   | 94   | 95   | 95   | 95   | 95   | 95   | 94   |      |      |      |      |      |      |      |      |      |      |      |      |  |  |
| Austria                                                         | 87   | 93   | 98   | 95   | 92   | 89   | 86   | 83   | 83   | 85   | 83   | 86   | 83   | 83   | 81   | 44   | 33   |      |      |      |      |      |      |      |      |      |      |      |  |  |
| Azerbaijan                                                      | 97   | 96   | 94   | 93   | 88   | 84   | 80   | 74   | 68   | 62   | 52   | 49   | 50   | 51   | 50   |      |      |      |      |      |      |      |      |      |      |      |      |      |  |  |
| Bahamas                                                         | 94   | 95   | 96   | 97   | 96   | 95   | 98   | 95   | 90   | 93   | 96   | 93   | 93   | 88   | 89   | 21   |      |      |      |      |      |      |      |      |      |      |      |      |  |  |
| Bahrain                                                         | 99   | 98   | 98   | 99   | 99   | 99   | 99   | 98   | 97   | 97   | 98   | 98   | 98   | 98   | 98   | 99   | 97   | 97   | 95   | 95   | 96   | 95   | 93   | 90   | 57   |      |      |      |  |  |
| Bangladesh                                                      | 97   | 97   | 97   | 96   | 94   | 96   | 94   | 97   | 96   | 95   | 86   | 45   | 11   | 5    |      |      |      |      |      |      |      |      |      |      |      |      |      |      |  |  |
| Barbados                                                        | 97   | 97   | 94   | 91   | 87   | 91   | 86   | 93   | 85   | 93   | 84   | 92   | 93   | 91   | 66   | 18   |      |      |      |      |      |      |      |      |      |      |      |      |  |  |
| Belarus                                                         | 96   | 99   | 97   | 98   | 97   | 98   | 96   | 98   | 98   | 91   | 98   | 99   | 99   | 56   | 99   | 93   | 70   |      |      |      |      |      |      |      |      |      |      |      |  |  |
| Belgium                                                         | 97   | 98   | 98   | 98   | 98   | 97   | 97   | 97   | 98   | 94   | 94   | 77   | 64   | 64   | 60   | 60   | 60   | 46   | 31   | 2    |      |      |      |      |      |      |      |      |  |  |
| Belize                                                          | 95   | 94   | 95   | 95   | 98   | 95   | 96   | 97   | 94   | 96   | 98   | 96   | 97   | 96   | 97   | 96   | 76   |      |      |      |      |      |      |      |      |      |      |      |  |  |
| Benin                                                           | 82   | 82   | 78   | 77   | 80   | 75   | 76   | 79   | 75   | 82   | 74   | 70   | 75   | 73   | 15   |      |      |      |      |      |      |      |      |      |      |      |      |      |  |  |
| Bhutan                                                          | 98   | 99   | 99   | 97   | 97   | 95   | 91   | 93   | 96   | 95   | 95   | 95   | 89   | 95   | 83   | 89   | 98   | 90   | 81   | 84   | 16   |      |      |      |      |      |      |      |  |  |
| Bolivia (Plurinational State of)                                | 99   | 99   | 98   | 94   | 93   | 95   | 91   | 93   | 88   | 84   | 83   | 85   | 84   | 80   | 77   | 77   | 77   |      |      |      |      |      |      |      |      |      |      |      |  |  |
| Bosnia and Herzegovina                                          | 78   | 82   | 89   | 91   | 92   | 88   | 89   | 90   | 88   | 94   | 90   | 93   | 36   |      |      |      |      |      |      |      |      |      |      |      |      |      |      |      |  |  |
| Botswana                                                        | 95   | 95   | 95   | 95   | 95   | 95   | 95   | 94   | 94   | 93   | 93   | 92   | 91   | 90   | 88   | 87   | 86   | 85   | 77   | 60   | 62   | 73   |      |      |      |      |      |      |  |  |
| Brazil                                                          | 86   | 96   | 96   | 96   | 96   | 98   | 96   | 99   | 96   | 99   | 99   | 98   | 96   | 97   | 92   | 91   | 94   | 84   | 13   | 6    | 15   | 10   | 4    |      |      |      |      |      |  |  |
| Brunei Darussalam                                               | 99   | 99   | 99   | 98   | 99   | 93   | 96   | 96   | 96   | 97   | 99   | 99   | 99   | 99   | 99   | 99   | 99   | 93   | 99   | 98   | 98   | 99   | 99   | 99   | 96   | 96   | 96   |      |  |  |
| Bulgaria                                                        | 91   | 92   | 95   | 95   | 95   | 96   | 95   | 96   | 96   | 95   | 96   | 96   | 94   | 96   | 88   | 93   | 94   | 97   | 97   | 77   | 94   | 95   | 94   | 96   | 71   |      |      |      |  |  |
| Burkina Faso                                                    | 91   | 91   | 91   | 88   | 90   | 91   | 91   | 92   | 93   | 89   | 76   |      |      |      |      |      |      |      |      |      |      |      |      |      |      |      |      |      |  |  |
| Burundi                                                         | 94   | 94   | 95   | 96   | 96   | 96   | 96   | 94   | 92   | 99   | 92   | 87   | 83   |      |      |      |      |      |      |      |      |      |      |      |      |      |      |      |  |  |
| Côte d'Ivoire                                                   | 85   | 83   | 76   | 80   | 82   | 62   | 85   | 81   | 74   | 76   | 77   | 76   | 67   | 63   | 48   | 10   |      |      |      |      |      |      |      |      |      |      |      |      |  |  |
| Cabo Verde                                                      | 96   | 96   | 97   | 94   | 94   | 90   | 98   | 98   | 98   | 96   | 95   | 93   | 91   | 66   | 40   |      |      |      |      |      |      |      |      |      |      |      |      |      |  |  |
| Cambodia                                                        | 90   | 89   | 88   | 83   | 86   | 88   | 89   | 92   | 91   | 82   | 80   |      |      |      |      |      |      |      |      |      |      |      |      |      |      |      |      |      |  |  |
| Cameroon                                                        | 85   | 84   | 87   | 89   | 85   | 82   | 84   | 80   | 84   | 82   | 81   | 79   |      |      |      |      |      |      |      |      |      |      |      |      |      |      |      |      |  |  |
| Canada                                                          | 55   | 55   | 55   | 55   | 70   | 70   | 56   | 42   | 28   | 14   | 14   | 14   | 14   | 14   |      |      |      |      |      |      |      |      |      |      |      |      |      |      |  |  |
| Central African Republic                                        | 47   | 47   | 47   | 23   | 47   | 47   | 45   | 42   |      |      |      |      |      |      |      |      |      |      |      |      |      |      |      |      |      |      |      |      |  |  |
| Chad                                                            | 46   | 46   | 37   | 39   | 40   | 33   | 39   | 24   | 17   |      |      |      |      |      |      |      |      |      |      |      |      |      |      |      |      |      |      |      |  |  |



|                                  |    |    |    |    |    |    |    |    |    |    |    |    |    |    |    |    |    |    |    |    |    |    |    |    |    |    |    |    |
|----------------------------------|----|----|----|----|----|----|----|----|----|----|----|----|----|----|----|----|----|----|----|----|----|----|----|----|----|----|----|----|
| Indonesia                        | 79 | 78 | 78 | 85 | 83 | 81 | 83 | 82 | 82 | 76 | 66 | 65 | 64 | 64 | 63 | 62 | 65 | 77 | 76 | 65 | 62 | 50 | 42 | 43 | 28 |    |    |    |
| Iran (Islamic Republic of)       | 99 | 98 | 99 | 99 | 98 | 99 | 99 | 99 | 99 | 97 | 98 | 94 | 95 | 98 | 99 | 94 | 99 | 95 | 94 | 93 | 84 | 59 | 62 |    |    |    |    |    |
| Iraq                             | 61 | 56 | 62 | 66 | 61 | 77 | 72 | 75 | 66 | 56 | 59 | 65 | 62 | 63 | 65 | 66 | 67 | 52 | 3  | 65 | 22 | 57 | 40 |    |    |    |    |    |
| Ireland                          | 95 | 95 | 95 | 95 | 95 | 95 | 46 |    |    |    |    |    |    |    |    |    |    |    |    |    |    |    |    |    |    |    |    |    |
| Israel                           | 95 | 96 | 97 | 97 | 97 | 98 | 97 | 98 | 99 | 99 | 96 | 96 | 99 | 98 | 98 | 96 | 98 | 96 | 97 | 97 | 96 | 93 | 92 | 92 | 92 |    |    |    |
| Italy                            | 93 | 93 | 95 | 96 | 96 | 96 | 96 | 96 | 96 | 97 | 96 | 96 | 96 | 95 | 95 | 95 | 94 | 97 | 95 | 95 | 95 | 95 | 95 | 95 | 95 | 95 |    |    |
| Jamaica                          | 98 | 91 | 92 | 93 | 96 | 92 | 94 | 90 | 92 | 92 | 97 | 99 | 98 | 36 |    |    |    |    |    |    |    |    |    |    |    |    |    |    |
| Jordan                           | 98 | 99 | 98 | 98 | 98 | 98 | 98 | 98 | 97 | 98 | 98 | 95 | 95 | 97 | 95 | 97 | 93 | 92 | 91 | 90 | 85 | 54 |    |    |    |    |    |    |
| Kazakhstan                       | 82 | 98 | 95 | 99 | 95 | 99 | 99 | 99 | 99 | 94 | 99 | 94 | 99 | 99 | 95 | 95 | 99 | 90 | 49 |    |    |    |    |    |    |    |    |    |
| Kenya                            | 89 | 89 | 92 | 93 | 94 | 96 | 90 | 88 | 88 | 81 | 80 | 76 | 73 | 73 | 84 |    |    |    |    |    |    |    |    |    |    |    |    |    |
| Kiribati                         | 81 | 82 | 75 | 95 | 94 | 95 | 91 | 86 | 83 | 96 | 88 | 50 | 67 | 73 | 79 | 85 | 90 | 82 | 89 | 97 | 66 | 36 | 36 | 8  | 6  | 7  | 73 |    |
| Kuwait                           | 99 | 99 | 96 | 99 | 98 | 99 | 99 | 99 | 99 | 99 | 99 | 99 | 94 | 99 | 99 | 99 | 95 | 95 | 99 | 98 | 99 | 99 | 93 | 91 | 38 |    |    |    |
| Kyrgyzstan                       | 96 | 97 | 96 | 97 | 96 | 96 | 96 | 96 | 97 | 94 | 90 | 97 | 99 | 99 | 99 | 57 | 44 | 10 |    |    |    |    |    |    |    |    |    |    |
| Lao People's Democratic Republic | 82 | 89 | 88 | 87 | 79 | 78 | 74 | 67 | 61 | 50 | 57 | 49 | 45 | 50 |    |    |    |    |    |    |    |    |    |    |    |    |    |    |
| Latvia                           | 98 | 94 | 92 | 94 | 90 | 89 | 91 | 92 | 93 | 91 | 94 | 99 | 98 | 98 | 98 | 96 | 95 | 94 | 9  |    |    |    |    |    |    |    |    |    |
| Lebanon                          | 81 | 81 | 81 | 81 | 81 | 81 | 81 | 81 | 81 | 80 | 78 | 77 | 75 | 74 | 77 | 80 | 83 | 86 |    |    |    |    |    |    |    |    |    |    |
| Lesotho                          | 93 | 93 | 93 | 93 | 95 | 96 | 93 | 91 | 88 | 90 | 91 | 87 | 60 | 17 |    |    |    |    |    |    |    |    |    |    |    |    |    |    |
| Liberia                          | 79 | 52 | 50 | 76 | 80 | 77 | 47 | 64 | 64 |    |    |    |    |    |    |    |    |    |    |    |    |    |    |    |    |    |    |    |
| Libya                            | 97 | 97 | 94 | 96 | 98 | 98 | 98 | 98 | 98 | 98 | 98 | 97 | 99 | 96 | 91 | 93 | 92 | 92 | 92 | 91 | 93 | 92 | 92 | 91 | 88 |    |    |    |
| Lithuania                        | 95 | 94 | 94 | 93 | 93 | 95 | 94 | 95 | 96 | 96 | 95 | 95 | 94 | 95 | 94 | 95 | 98 | 96 | 73 |    |    |    |    |    |    |    |    |    |
| Luxembourg                       | 94 | 94 | 94 | 94 | 94 | 95 | 94 | 95 | 94 | 87 | 95 | 95 | 94 | 95 | 95 | 86 | 77 | 67 | 58 | 49 |    |    |    |    |    |    |    |    |
| Madagascar                       | 77 | 69 | 73 | 74 | 70 | 73 | 70 | 77 | 77 | 84 | 82 | 81 | 71 | 61 | 51 |    |    |    |    |    |    |    |    |    |    |    |    |    |
| Malawi                           | 84 | 88 | 91 | 89 | 96 | 97 | 93 | 93 | 91 | 87 | 99 | 93 | 89 | 84 | 64 |    |    |    |    |    |    |    |    |    |    |    |    |    |
| Malaysia                         | 98 | 99 | 96 | 96 | 97 | 96 | 96 | 96 | 97 | 96 | 95 | 96 | 94 | 95 | 95 | 95 | 97 | 96 | 96 | 97 | 96 | 96 | 94 | 86 | 86 | 89 | 86 | 69 |
| Maldives                         | 99 | 99 | 99 | 99 | 99 | 96 | 97 | 98 | 98 | 98 | 98 | 98 | 97 | 98 | 98 | 98 | 96 | 90 | 45 | 50 | 96 | 80 | 63 | 21 |    |    |    |    |
| Mali                             | 68 | 64 | 73 | 69 | 66 | 66 | 72 | 71 | 74 | 74 | 90 | 83 | 73 | 79 |    |    |    |    |    |    |    |    |    |    |    |    |    |    |
| Malta                            | 97 | 95 | 90 | 94 | 93 | 82 | 75 | 86 | 86 | 82 | 86 | 85 | 85 | 89 |    |    |    |    |    |    |    |    |    |    |    |    |    |    |
| Marshall Islands                 | 73 | 85 | 79 | 80 | 80 | 89 | 97 | 99 | 97 | 93 | 97 | 89 | 72 | 74 | 80 | 76 | 38 | 80 | 80 | 70 | 68 | 47 | 46 | 17 | 24 | 17 | 10 | 3  |
| Mauritania                       | 73 | 73 | 84 | 80 | 80 | 75 | 64 | 64 | 74 | 74 | 68 | 42 |    |    |    |    |    |    |    |    |    |    |    |    |    |    |    |    |
| Mauritius                        | 72 | 97 | 97 | 98 | 98 | 98 | 99 | 99 | 99 | 97 | 97 | 97 | 98 | 97 | 88 | 92 | 88 | 85 | 90 | 90 |    |    |    |    |    |    |    |    |
| Mexico                           | 93 | 82 | 84 | 82 | 99 | 98 | 93 | 95 | 97 | 98 | 98 | 98 | 98 | 98 | 97 | 97 | 97 |    |    |    |    |    |    |    |    |    |    |    |
| Micronesia (Federated States of) | 76 | 78 | 81 | 83 | 82 | 83 | 88 | 89 | 89 | 90 | 84 | 91 | 80 | 89 | 85 | 81 | 87 | 77 | 79 | 78 | 80 | 82 | 82 | 82 | 73 | 65 | 56 | 47 |
| Monaco                           | 99 | 99 | 99 | 99 | 99 | 99 | 99 | 99 | 99 | 99 | 99 | 99 | 99 | 99 | 99 | 99 | 99 |    |    |    |    |    |    |    |    |    |    |    |
| Mongolia                         | 99 | 99 | 99 | 98 | 99 | 99 | 96 | 97 | 96 | 98 | 98 | 98 | 98 | 98 | 98 | 95 | 93 | 92 | 91 | 88 | 93 | 88 | 67 | 69 | 47 | 18 |    |    |
| Montenegro                       | 75 | 82 | 87 | 90 | 90 | 91 | 90 | 87 | 93 | 90 | 90 |    |    |    |    |    |    |    |    |    |    |    |    |    |    |    |    |    |
| Morocco                          | 99 | 99 | 99 | 99 | 99 | 98 | 98 | 98 | 97 | 95 | 95 | 96 | 95 | 90 | 92 | 84 | 43 | 10 |    |    |    |    |    |    |    |    |    |    |
| Mozambique                       | 80 | 80 | 79 | 78 | 76 | 76 | 74 | 74 | 75 | 75 | 75 | 75 | 76 | 76 | 76 | 25 |    |    |    |    |    |    |    |    |    |    |    |    |
| Myanmar                          | 90 | 89 | 88 | 75 | 58 | 40 | 92 | 91 | 85 | 85 | 75 | 62 | 39 | 8  |    |    |    |    |    |    |    |    |    |    |    |    |    |    |
| Namibia                          | 92 | 92 | 88 | 89 | 84 | 82 | 83 |    |    |    |    |    |    |    |    |    |    |    |    |    |    |    |    |    |    |    |    |    |

|                                     |    |    |    |    |    |    |    |    |    |    |    |    |    |    |    |    |    |    |    |    |    |    |    |    |    |    |    |
|-------------------------------------|----|----|----|----|----|----|----|----|----|----|----|----|----|----|----|----|----|----|----|----|----|----|----|----|----|----|----|
| Nauru                               | 91 | 91 | 95 | 87 | 79 | 99 | 99 | 99 | 99 | 99 | 99 | 80 | 78 | 77 | 75 | 95 | 58 | 62 | 29 | 86 | 72 | 57 | 79 | 99 | 90 | 79 |    |
| Nepal                               | 87 | 91 | 92 | 92 | 90 | 92 | 82 | 89 | 82 | 82 | 69 | 41 | 27 | 2  |    |    |    |    |    |    |    |    |    |    |    |    |    |
| Netherlands                         | 93 | 94 | 92 | 51 | 20 | 20 |    |    |    |    |    |    |    |    |    |    |    |    |    |    |    |    |    |    |    |    |    |
| New Zealand                         | 92 | 92 | 93 | 93 | 93 | 95 | 90 | 93 | 90 | 88 | 87 | 87 | 88 | 89 | 89 | 90 | 90 | 89 | 87 | 99 | 94 | 88 | 81 | 74 | 67 |    |    |
| Nicaragua                           | 98 | 98 | 98 | 98 | 98 | 98 | 98 | 98 | 97 | 93 | 88 | 86 | 79 | 86 | 85 | 87 | 83 | 80 |    |    |    |    |    |    |    |    |    |
| Niger                               | 67 | 65 | 68 | 67 | 71 | 75 | 70 | 71 |    |    |    |    |    |    |    |    |    |    |    |    |    |    |    |    |    |    |    |
| Nigeria                             | 49 | 49 | 49 | 46 | 42 | 46 | 49 | 63 | 41 | 42 | 27 | 18 |    |    |    |    |    |    |    |    |    |    |    |    |    |    |    |
| Niue                                | 99 | 99 | 99 | 99 | 98 | 98 | 99 | 99 | 99 | 98 | 99 | 85 | 99 | 94 | 98 | 99 | 99 | 99 | 99 | 99 | 99 | 90 | 99 | 99 | 99 | 99 |    |
| Oman                                | 99 | 99 | 99 | 98 | 98 | 99 | 99 | 98 | 99 | 99 | 99 | 99 | 99 | 99 | 99 | 99 | 99 | 99 | 99 | 99 | 99 | 99 | 99 | 96 | 99 | 94 |    |
| Pakistan                            | 72 | 72 | 72 | 72 | 72 | 74 | 82 | 78 | 65 | 75 | 78 | 70 | 65 | 63 |    |    |    |    |    |    |    |    |    |    |    |    |    |
| Palau                               | 98 | 90 | 99 | 99 | 89 | 91 | 80 | 69 | 92 | 91 | 98 | 98 | 98 | 99 | 99 | 98 | 96 | 96 | 96 | 90 | 99 | 99 | 73 | 94 | 75 | 89 |    |
| Panama                              | 73 | 73 | 80 | 80 | 85 | 87 | 94 | 85 | 86 | 85 | 88 | 92 | 95 | 98 | 98 | 98 |    |    |    |    |    |    |    |    |    |    |    |
| Papua New Guinea                    | 66 | 67 | 67 | 73 | 68 | 66 | 56 | 66 | 59 | 61 | 71 | 63 | 60 | 67 | 60 | 59 | 57 | 54 | 47 | 44 | 43 | 23 | 20 | 7  | 12 | 19 | 20 |
| Paraguay                            | 93 | 93 | 87 | 86 | 87 | 89 | 89 | 85 | 87 | 86 | 92 | 92 | 90 | 86 |    |    |    |    |    |    |    |    |    |    |    |    |    |
| Peru                                | 89 | 90 | 88 | 88 | 95 | 91 | 93 | 93 | 93 | 93 | 94 | 94 | 92 | 65 |    |    |    |    |    |    |    |    |    |    |    |    |    |
| Philippines                         | 86 | 60 | 67 | 89 | 88 | 87 | 77 | 85 | 88 | 87 | 77 | 49 | 48 | 52 | 42 | 45 | 7  | 32 | 30 | 31 | 35 | 38 |    |    |    |    |    |
| Poland                              | 96 | 96 | 96 | 96 | 97 | 98 | 98 | 98 | 98 | 98 | 98 | 98 | 98 | 97 | 98 | 95 | 99 | 99 | 99 | 97 | 56 | 23 | 4  | 1  | 1  | 1  |    |
| Portugal                            | 98 | 98 | 98 | 98 | 98 | 97 | 97 | 96 | 97 | 97 | 97 | 94 | 94 | 94 | 82 | 70 | 58 | 61 | 64 | 49 | 34 | 6  |    |    |    |    |    |
| Qatar                               | 98 | 99 | 89 | 97 | 93 | 93 | 97 | 99 | 97 | 94 | 96 | 97 | 97 | 93 | 98 | 93 | 89 | 92 | 92 | 90 | 90 | 90 | 90 | 93 | 89 | 86 |    |
| Republic of Korea                   | 98 | 98 | 99 | 99 | 99 | 99 | 94 | 94 | 94 | 91 | 99 | 99 | 92 | 91 | 92 | 89 | 93 | 88 | 82 | 88 | 93 | 99 |    |    |    |    |    |
| Republic of<br>Moldova              | 90 | 88 | 92 | 91 | 94 | 96 | 98 | 89 | 97 | 95 | 98 | 99 | 99 | 99 | 99 | 94 | 92 | 94 | 93 | 87 | 81 | 19 |    |    |    |    |    |
| Romania                             | 90 | 90 | 94 | 96 | 96 | 96 | 98 | 95 | 97 | 99 | 99 | 98 | 99 | 98 | 99 | 98 | 98 | 99 | 99 | 99 | 99 |    |    |    |    |    |    |
| Russian Federation                  | 97 | 97 | 97 | 97 | 97 | 97 | 97 | 98 | 98 | 98 | 98 | 97 | 96 | 94 | 81 | 43 |    |    |    |    |    |    |    |    |    |    |    |
| Rwanda                              | 98 | 98 | 98 | 98 | 98 | 97 | 97 | 97 | 97 | 97 | 99 | 95 | 89 | 96 | 88 |    |    |    |    |    |    |    |    |    |    |    |    |
| Saint Kitts and<br>Nevis            | 98 | 94 | 98 | 97 | 98 | 98 | 96 | 97 | 98 | 99 | 99 | 99 | 96 | 99 | 96 | 99 | 99 | 99 | 99 |    |    |    |    |    |    |    |    |
| Saint Lucia                         | 95 | 99 | 99 | 99 | 98 | 99 | 97 | 95 | 96 | 99 | 85 | 95 | 91 | 84 | 14 |    |    |    |    |    |    |    |    |    |    |    |    |
| Saint Vincent and<br>the Grenadines | 98 | 98 | 98 | 97 | 96 | 96 | 99 | 99 | 99 | 99 | 99 | 99 | 99 | 31 |    |    |    |    |    |    |    |    |    |    |    |    |    |
| Samoa                               | 55 | 59 | 56 | 60 | 64 | 58 | 57 | 44 | 12 | 46 | 35 | 41 | 54 | 83 | 86 | 89 | 89 | 94 | 97 | 99 | 98 | 96 | 94 | 1  | 18 |    |    |
| San Marino                          | 66 | 75 | 80 | 69 | 96 | 86 | 78 | 92 | 87 | 92 | 95 | 95 | 97 | 96 | 95 | 95 | 94 | 97 |    | 97 | 98 | 98 | 98 | 98 | 99 | 99 |    |
| Sao Tome and<br>Principe            | 96 | 96 | 95 | 97 | 96 | 96 | 98 | 98 | 99 | 87 | 75 | 96 | 70 | 43 |    |    |    |    |    |    |    |    |    |    |    |    |    |
| Saudi Arabia                        | 98 | 98 | 98 | 98 | 98 | 98 | 98 | 98 | 98 | 96 | 96 | 97 | 96 | 95 | 97 | 95 | 93 | 92 | 95 | 91 | 92 | 93 | 94 | 93 | 89 | 86 | 66 |
| Senegal                             | 93 | 89 | 89 | 92 | 91 | 92 | 89 | 86 | 88 | 94 | 89 | 84 | 54 |    |    |    |    |    |    |    |    |    |    |    |    |    |    |
| Serbia                              | 91 | 94 | 92 | 91 | 97 | 94 | 89 | 93 | 93 | 99 | 93 | 65 | 89 |    |    |    |    |    |    |    |    |    |    |    |    |    |    |
| Seychelles                          | 97 | 98 | 99 | 99 | 99 | 99 | 99 | 99 | 99 | 99 | 99 | 99 | 99 | 99 | 99 | 96 | 98 | 99 | 97 | 97 | 98 | 99 |    |    |    |    |    |
| Sierra Leone                        | 84 | 86 | 83 | 92 | 91 | 89 | 86 | 84 | 77 | 63 |    |    |    |    |    |    |    |    |    |    |    |    |    |    |    |    |    |
| Singapore                           | 96 | 96 | 96 | 97 | 97 | 96 | 96 | 96 | 97 | 96 | 95 | 96 | 94 | 95 | 95 | 95 | 97 | 96 | 96 | 97 | 96 | 96 | 94 | 90 | 78 | 76 | 74 |
| Slovakia                            | 96 | 96 | 97 | 98 | 99 | 99 | 99 | 99 | 99 | 99 | 99 | 99 | 99 | 99 | 99 | 99 | 98 |    |    |    |    |    |    |    |    |    |    |
| Solomon Islands                     | 99 | 98 | 88 | 94 | 99 | 99 | 90 | 92 | 89 | 90 | 99 | 83 | 81 | 79 | 75 | 83 | 81 | 79 | 75 | 73 | 97 | 68 | 65 | 53 |    |    |    |
| Somalia                             | 42 | 42 | 42 | 42 |    |    |    |    |    |    |    |    |    |    |    |    |    |    |    |    |    |    |    |    |    |    |    |
| South Africa                        | 66 | 75 | 80 | 70 | 68 | 76 | 71 | 74 | 76 | 83 | 83 | 79 | 76 | 71 | 72 | 72 | 73 | 73 | 74 | 74 |    |    |    |    |    |    |    |





**Table S5: Distribution of hepatitis D virus genotypes in different countries and regions.**

| Location                     | Year | HDV-1 | HDV-2 | HDV-3 | HDV-4 | HDV-5 | HDV-6 | HDV-7 | HDV-8 |
|------------------------------|------|-------|-------|-------|-------|-------|-------|-------|-------|
| Africa                       |      |       |       |       |       |       |       |       |       |
| Cameroon <sup>2</sup>        | 2011 | 22    |       |       |       | 1     | 1     | 1     |       |
| CAR <sup>3</sup>             | 1998 | 1     |       |       |       |       |       |       |       |
| CAR <sup>4</sup>             | 2014 | 6     |       |       |       |       |       |       |       |
| Chad <sup>4</sup>            | 2014 | 3     |       |       |       |       |       |       |       |
| Egypt <sup>5</sup>           | 2003 | 9     |       |       |       |       |       |       |       |
| Egypt <sup>6</sup>           | 2016 |       | 12    |       |       |       |       |       |       |
| Gabon <sup>7</sup>           | 2008 | 1     |       |       |       |       |       |       | 2     |
| Gabon <sup>8</sup>           | 2009 | 10    |       |       |       |       |       | 2     | 5     |
| Gabon <sup>9</sup>           | 2016 | 2     |       |       |       |       |       |       | 14    |
| Mauritania <sup>10</sup>     | 2012 | 28    |       |       |       | 3     |       |       |       |
| Mauritania <sup>11</sup>     | 2012 | 25    |       |       |       | 3     |       |       |       |
| Mauritania <sup>12</sup>     | 2013 | 40    |       |       |       | 7     |       |       |       |
| Nigeria <sup>4</sup>         | 2014 | 8     |       |       |       | 5     | 2     |       |       |
| Nigeria <sup>13</sup>        | 2016 | 14    |       |       |       |       |       |       |       |
| Tunisia <sup>14</sup>        | 2015 | 11    |       |       |       |       |       |       |       |
| Asia                         |      |       |       |       |       |       |       |       |       |
| China Mainland <sup>15</sup> | 1996 | 10    |       |       |       |       |       |       |       |
| China Mainland <sup>16</sup> | 2015 | 3     |       |       |       |       |       |       |       |

|                            |      |        |        |        |
|----------------------------|------|--------|--------|--------|
| China Taiwan <sup>17</sup> | 1995 | 24     | 64     |        |
| China Taiwan <sup>18</sup> | 1999 | 4      | 7      |        |
| China Taiwan <sup>19</sup> | 2002 | 13     | 20     |        |
| China Taiwan <sup>20</sup> | 2003 |        | 4      |        |
| China Taiwan <sup>21</sup> | 2006 | 51     | 74     | 8      |
| China Taiwan <sup>22</sup> | 2011 | 5      | 43     | 53     |
| China Taiwan <sup>23</sup> | 2012 | 11.80% | 27.60% | 60.50% |
| China Taiwan <sup>24</sup> | 2014 |        | 2      | 10     |
| China Taiwan <sup>25</sup> | 2015 | 13     | 54     | 86     |
| China Taiwan <sup>26</sup> | 2015 |        | 7      |        |
| Iran <sup>27</sup>         | 2008 | 22     |        |        |
| Iran <sup>28</sup>         | 2013 | 3      |        |        |
| Iran <sup>29</sup>         | 2013 | 12     |        |        |
| Iran <sup>30</sup>         | 2014 | 2      |        |        |
| Iran <sup>31</sup>         | 2015 | 38     |        |        |
| Iran <sup>32</sup>         | 2015 | 10     | 2      |        |
| Japan <sup>33</sup>        | 1999 |        | 6      |        |
| Japan <sup>34</sup>        | 2000 |        | 6      |        |
| Japan <sup>35</sup>        | 2003 | 2      | 31     |        |
| Japan <sup>36</sup>        | 2003 |        | 1      |        |
| Japan <sup>37</sup>        | 2005 |        | 3      |        |
| Korean <sup>38</sup>       | 2011 | 2      |        |        |

|                               |      |     |    |   |
|-------------------------------|------|-----|----|---|
| Lebanon <sup>39</sup>         | 2007 | 1   |    |   |
| Mongolia <sup>40</sup>        | 2004 | 20  |    |   |
| Mongolia <sup>41</sup>        | 2005 | 117 |    |   |
| Mongolia <sup>42</sup>        | 2005 | 27  |    |   |
| Mongolia <sup>43</sup>        | 2005 | 1   |    |   |
| Mongolia <sup>44</sup>        | 2006 | 32  |    |   |
| Pakistan <sup>45</sup>        | 2007 | 23  |    |   |
| Pakistan <sup>46</sup>        | 2014 | 21  |    |   |
| Tajikistan <sup>47</sup>      | 2008 | 10  |    |   |
| Thailand <sup>48</sup>        | 2002 | 8   |    |   |
| Turkey <sup>49</sup>          | 1997 | 5   |    |   |
| Turkey <sup>50</sup>          | 2004 | 13  |    |   |
| Turkey <sup>51</sup>          | 2011 | 9   |    |   |
| Turkey <sup>52</sup>          | 2012 | 34  |    |   |
| Turkey <sup>53</sup>          | 2014 | 40  |    |   |
| Vietnam <sup>54</sup>         | 2013 | 19  | 2  |   |
| Vietnam <sup>55</sup>         | 2015 | 12  | 5  |   |
| Yakutia, Russia <sup>56</sup> | 2001 | 14  | 15 |   |
| Europe                        |      |     |    |   |
| Albania <sup>49</sup>         | 1997 | 10  |    |   |
| France <sup>57</sup>          | 2014 | 12  | 1  | 1 |
| Greece <sup>49</sup>          | 1997 | 30  |    |   |

|                           |      |    |    |   |
|---------------------------|------|----|----|---|
| Italy <sup>58</sup>       | 1996 | 45 |    |   |
| Poland <sup>59</sup>      | 2006 | 4  |    |   |
| Romania <sup>60</sup>     | 2013 | 40 |    |   |
| Russia <sup>61</sup>      | 2000 | 4  |    |   |
| Spain <sup>62</sup>       | 1998 | 37 |    |   |
| Switzerland <sup>63</sup> | 2016 | 66 | 4  |   |
| UK <sup>64</sup>          | 2012 | 22 | 17 | 1 |
| UK <sup>65</sup>          | 2013 | 2  |    |   |
| UK <sup>66</sup>          | 2015 | 19 | 6  |   |
| North America             |      |    |    |   |
| Canada <sup>67</sup>      | 1999 | 1  |    |   |
| USA <sup>49</sup>         | 1997 | 22 |    |   |
| Oceania                   |      |    |    |   |
| Kiribati <sup>68</sup>    | 2014 | 14 |    |   |
| South America             |      |    |    |   |
| Brazil <sup>69</sup>      | 2006 | 22 | 18 |   |
| Brazil <sup>70</sup>      | 2009 |    | 14 |   |
| Brazil <sup>71</sup>      | 2011 |    | 1  | 2 |
| Brazil <sup>72</sup>      | 2011 | 1  |    |   |
| Brazil <sup>73</sup>      | 2014 |    | 90 |   |
| Brazil <sup>74</sup>      | 2014 |    | 38 |   |
| Brazil <sup>75</sup>      | 2015 | 4  | 48 |   |

|                         |      |   |    |   |
|-------------------------|------|---|----|---|
| Brazil <sup>76</sup>    | 2016 |   |    | 4 |
| Colombia <sup>77</sup>  | 2011 |   | 5  |   |
| Colombia <sup>78</sup>  | 2015 |   | 7  |   |
| Peru <sup>79</sup>      | 1996 |   | 37 |   |
| Venezuela <sup>80</sup> | 2001 |   | 3  |   |
| Venezuela <sup>81</sup> | 2001 | 7 | 5  |   |

**Table S6: The HDV prevalence in general individuals with different SDI levels**

| SDI      | Location | Year | Events | N        | _ES    | _seES  | _LCI   | _UCI   | _WT    |
|----------|----------|------|--------|----------|--------|--------|--------|--------|--------|
| high SDI | USA      | 1990 | 0      | 129      | 0.0000 | 0.0879 | 0.0000 | 0.0289 | 1.5104 |
| high SDI | Italy    | 2012 | 24     | 22758    | 0.0011 | 0.0066 | 0.0007 | 0.0016 | 2.2864 |
| high SDI | Italy    | 2008 | 130    | 9997     | 0.0130 | 0.0100 | 0.0110 | 0.0154 | 2.2778 |
| high SDI | Greece   | 1987 | 0      | 329      | 0.0000 | 0.0551 | 0.0000 | 0.0115 | 1.9051 |
| high SDI | France   | 2013 | 123    | 39911011 | 0.0000 | 0.0002 | 0.0000 | 0.0000 | 2.2931 |
| high SDI | France   | 1988 | 0      | 50       | 0.0000 | 0.1407 | 0.0000 | 0.0713 | 0.9846 |
| high SDI | Taiwan   | 1989 | 1      | 130      | 0.0077 | 0.0875 | 0.0014 | 0.0423 | 1.5143 |
| high SDI | Taiwan   | 1988 | 5      | 1200     | 0.0042 | 0.0289 | 0.0018 | 0.0097 | 2.1717 |
| high SDI | Japan    | 2000 | 32     | 4728     | 0.0068 | 0.0145 | 0.0048 | 0.0095 | 2.2610 |
| high SDI | Japan    | 1997 | 46     | 2028     | 0.0227 | 0.0222 | 0.0170 | 0.0301 | 2.2197 |

|                 |                  |      |     |       |        |        |        |        |        |
|-----------------|------------------|------|-----|-------|--------|--------|--------|--------|--------|
| high SDI        | Japan            | 1989 | 0   | 519   | 0.0000 | 0.0439 | 0.0000 | 0.0073 | 2.0308 |
| high SDI        | Japan            | 1989 | 0   | 519   | 0.0000 | 0.0439 | 0.0000 | 0.0073 | 2.0308 |
| high SDI        | Saudi Arabia     | 1986 | 9   | 608   | 0.0148 | 0.0405 | 0.0078 | 0.0279 | 2.0653 |
| high SDI        | Saudi Arabia     | 2004 | 67  | 19250 | 0.0035 | 0.0072 | 0.0027 | 0.0044 | 2.2852 |
| high SDI        | Saudi Arabia     | 2004 | 2   | 3147  | 0.0006 | 0.0178 | 0.0002 | 0.0023 | 2.2453 |
| high SDI        | Australia        | 2013 | 110 | 2314  | 0.0475 | 0.0208 | 0.0396 | 0.0570 | 2.2285 |
| high-middle SDI | Yugoslavia       | 1993 | 0   | 1140  | 0.0000 | 0.0296 | 0.0000 | 0.0034 | 2.1657 |
| high-middle SDI | Romania          | 2010 | 0   | 137   | 0.0000 | 0.0853 | 0.0000 | 0.0273 | 1.5410 |
| high-middle SDI | Iran             | 2008 | 8   | 1850  | 0.0043 | 0.0232 | 0.0022 | 0.0085 | 2.2129 |
| high-middle SDI | Iran             | 2012 | 1   | 3690  | 0.0003 | 0.0165 | 0.0000 | 0.0015 | 2.2522 |
| high-middle SDI | Turkey           | 2014 | 4   | 12423 | 0.0003 | 0.0090 | 0.0001 | 0.0008 | 2.2808 |
| high-middle SDI | China, Guangdong | 2005 | 60  | 4886  | 0.0123 | 0.0143 | 0.0096 | 0.0158 | 2.2621 |
| high-middle SDI | Guam             | 1988 | 0   | 50    | 0.0000 | 0.1407 | 0.0000 | 0.0713 | 0.9846 |



|            |           |      |    |      |        |        |        |        |        |
|------------|-----------|------|----|------|--------|--------|--------|--------|--------|
| middle SDI | Brazil    | 1988 | 33 | 574  | 0.0575 | 0.0417 | 0.0412 | 0.0796 | 2.0533 |
| middle SDI | Brazil    | 1995 | 3  | 798  | 0.0038 | 0.0354 | 0.0013 | 0.0110 | 2.1153 |
| middle SDI | Brazil    | 2005 | 47 | 2656 | 0.0177 | 0.0194 | 0.0133 | 0.0235 | 2.2366 |
| middle SDI | Colombia  | 2011 | 9  | 697  | 0.0129 | 0.0379 | 0.0068 | 0.0244 | 2.0918 |
| middle SDI | Colombia  | 2015 | 10 | 861  | 0.0116 | 0.0341 | 0.0063 | 0.0212 | 2.1274 |
| middle SDI | Venezuela | 2010 | 6  | 645  | 0.0093 | 0.0394 | 0.0043 | 0.0201 | 2.0772 |
| middle SDI | Albania   | 1995 | 6  | 1348 | 0.0045 | 0.0272 | 0.0020 | 0.0097 | 2.1844 |
| middle SDI | Vietnam   | 2007 | 2  | 837  | 0.0024 | 0.0346 | 0.0007 | 0.0087 | 2.1230 |
| middle SDI | Mongolia  | 2004 | 20 | 249  | 0.0803 | 0.0633 | 0.0526 | 0.1208 | 1.8070 |
| middle SDI | China     | 1987 | 4  | 649  | 0.0062 | 0.0392 | 0.0024 | 0.0157 | 2.0784 |
| middle SDI | China     | 2001 | 3  | 1185 | 0.0025 | 0.0290 | 0.0009 | 0.0074 | 2.1703 |
| middle SDI | China     | 2006 | 0  | 102  | 0.0000 | 0.0988 | 0.0000 | 0.0363 | 1.3857 |
| middle SDI | China     | 2016 | 2  | 672  | 0.0030 | 0.0386 | 0.0008 | 0.0108 | 2.0850 |

|                |             |      |    |      |        |        |        |        |        |
|----------------|-------------|------|----|------|--------|--------|--------|--------|--------|
| middle SDI     | Philippines | 1988 | 1  | 62   | 0.0161 | 0.1265 | 0.0029 | 0.0859 | 1.1057 |
| low-middle SDI | Pakistan    | 2016 | 23 | 946  | 0.0243 | 0.0325 | 0.0163 | 0.0362 | 2.1413 |
| low-middle SDI | Mauritania  | 2012 | 49 | 1966 | 0.0249 | 0.0226 | 0.0189 | 0.0328 | 2.2175 |
| low-middle SDI | Gabon       | 2016 | 33 | 442  | 0.0747 | 0.0475 | 0.0537 | 0.1030 | 1.9911 |
| low-middle SDI | Gabon       | 2008 | 17 | 1187 | 0.0143 | 0.0290 | 0.0090 | 0.0228 | 2.1705 |
| low-middle SDI | Gabon       | 1995 | 5  | 303  | 0.0165 | 0.0574 | 0.0071 | 0.0380 | 1.8779 |
| low-middle SDI | Micronesia  | 1988 | 0  | 260  | 0.0000 | 0.0620 | 0.0000 | 0.0146 | 1.8234 |
| low-middle SDI | Marshall    | 1988 | 2  | 50   | 0.0400 | 0.1407 | 0.0110 | 0.1346 | 0.9846 |
| low-middle SDI | Vanuatu     | 1988 | 0  | 92   | 0.0000 | 0.1040 | 0.0000 | 0.0401 | 1.3289 |
| low SDI        | Yemen       | 1993 | 2  | 1074 | 0.0019 | 0.0305 | 0.0005 | 0.0068 | 2.1583 |
| low SDI        | Benin       | 1990 | 28 | 499  | 0.0561 | 0.0447 | 0.0391 | 0.0799 | 2.0215 |
| low SDI        | Benin       | 2014 | 5  | 283  | 0.0177 | 0.0594 | 0.0076 | 0.0407 | 1.8542 |
| low SDI        | Niger       | 1987 | 12 | 238  | 0.0504 | 0.0648 | 0.0291 | 0.0860 | 1.7895 |

|         |                  |      |    |     |        |        |        |        |        |
|---------|------------------|------|----|-----|--------|--------|--------|--------|--------|
| low SDI | Ethiopia         | 1986 | 3  | 500 | 0.0060 | 0.0447 | 0.0020 | 0.0175 | 2.0220 |
| low SDI | Kiribati         | 1988 | 13 | 50  | 0.2600 | 0.1407 | 0.1587 | 0.3955 | 0.9846 |
| low SDI | Papua New Guinea | 1988 | 1  | 50  | 0.0200 | 0.1407 | 0.0035 | 0.1050 | 0.9846 |

**Table S7: Sensitive analysis in HBsAg positive populations**

| Study      | Coef.  | [95% Conf. | Interval] |
|------------|--------|------------|-----------|
| Benin      | 0.1613 | 0.1433     | 0.1794    |
| Benin      | 0.1621 | 0.1440     | 0.1802    |
| Ethiopia   | 0.1621 | 0.1440     | 0.1802    |
| Gabon      | 0.1609 | 0.1429     | 0.1790    |
| Gabon      | 0.1620 | 0.1439     | 0.1801    |
| Gabon      | 0.1622 | 0.1441     | 0.1803    |
| Ghana      | 0.1621 | 0.1440     | 0.1802    |
| Mauritania | 0.1618 | 0.1437     | 0.1799    |
| Mauritania | 0.1620 | 0.1439     | 0.1801    |
| Mauritania | 0.1617 | 0.1436     | 0.1799    |
| Niger      | 0.1616 | 0.1436     | 0.1797    |
| Niger      | 0.1624 | 0.1443     | 0.1805    |
| Egypt      | 0.1625 | 0.1444     | 0.1806    |
| Egypt      | 0.1618 | 0.1437     | 0.1799    |
| Kenya      | 0.1621 | 0.1439     | 0.1802    |
| Somalia    | 0.1610 | 0.1429     | 0.1790    |
| Zimbabwe   | 0.1620 | 0.1439     | 0.1801    |
| Tunisia    | 0.1625 | 0.1444     | 0.1807    |
| Tunisia    | 0.1630 | 0.1448     | 0.1811    |

|           |        |        |        |
|-----------|--------|--------|--------|
| Canada    | 0.1627 | 0.1446 | 0.1808 |
| USA       | 0.1621 | 0.1440 | 0.1801 |
| USA       | 0.1625 | 0.1443 | 0.1806 |
| USA       | 0.1622 | 0.1441 | 0.1803 |
| USA       | 0.1626 | 0.1445 | 0.1808 |
| USA       | 0.1616 | 0.1435 | 0.1797 |
| USA       | 0.1630 | 0.1448 | 0.1811 |
| Argentina | 0.1630 | 0.1448 | 0.1811 |
| Brazil    | 0.1612 | 0.1432 | 0.1793 |
| Brazil    | 0.1619 | 0.1438 | 0.1800 |
| Brazil    | 0.1612 | 0.1431 | 0.1793 |
| Brazil    | 0.1609 | 0.1429 | 0.1790 |
| Brazil    | 0.1625 | 0.1444 | 0.1806 |
| Brazil    | 0.1622 | 0.1441 | 0.1803 |
| Colombia  | 0.1625 | 0.1444 | 0.1806 |
| Colombia  | 0.1615 | 0.1434 | 0.1796 |
| Peru      | 0.1599 | 0.1419 | 0.1779 |
| Venezuela | 0.1619 | 0.1438 | 0.1800 |
| Venezuela | 0.1622 | 0.1441 | 0.1802 |
| Venezuela | 0.1609 | 0.1429 | 0.1790 |
| Venezuela | 0.1615 | 0.1434 | 0.1796 |
| Mongolia  | 0.1607 | 0.1427 | 0.1788 |

|                  |        |        |        |
|------------------|--------|--------|--------|
| China            | 0.1625 | 0.1444 | 0.1806 |
| China            | 0.1629 | 0.1448 | 0.1810 |
| China            | 0.1626 | 0.1445 | 0.1807 |
| China            | 0.1622 | 0.1441 | 0.1802 |
| China            | 0.1622 | 0.1441 | 0.1803 |
| China            | 0.1633 | 0.1449 | 0.1818 |
| China            | 0.1623 | 0.1442 | 0.1804 |
| China            | 0.1626 | 0.1445 | 0.1807 |
| China            | 0.1629 | 0.1448 | 0.1811 |
| China            | 0.1628 | 0.1446 | 0.1811 |
| China            | 0.1630 | 0.1448 | 0.1811 |
| China            | 0.1623 | 0.1442 | 0.1804 |
| China            | 0.1626 | 0.1445 | 0.1807 |
| China            | 0.1626 | 0.1444 | 0.1807 |
| China            | 0.1624 | 0.1443 | 0.1805 |
| China            | 0.1623 | 0.1442 | 0.1804 |
| China            | 0.1627 | 0.1446 | 0.1808 |
| China            | 0.1621 | 0.1440 | 0.1802 |
| China, Hong Kong | 0.1629 | 0.1448 | 0.1811 |
| China, Taiwan    | 0.1622 | 0.1441 | 0.1803 |
| China, Taiwan    | 0.1627 | 0.1445 | 0.1808 |
| China, Taiwan    | 0.1628 | 0.1447 | 0.1809 |

|               |        |        |        |
|---------------|--------|--------|--------|
| China, Taiwan | 0.1627 | 0.1445 | 0.1808 |
| China, Taiwan | 0.1624 | 0.1443 | 0.1805 |
| China, Taiwan | 0.1616 | 0.1436 | 0.1797 |
| China, Taiwan | 0.1617 | 0.1437 | 0.1798 |
| China, Taiwan | 0.1611 | 0.1430 | 0.1792 |
| China, Taiwan | 0.1619 | 0.1438 | 0.1801 |
| China, Taiwan | 0.1621 | 0.1440 | 0.1803 |
| India         | 0.1629 | 0.1447 | 0.1810 |
| India         | 0.1626 | 0.1445 | 0.1807 |
| India         | 0.1624 | 0.1443 | 0.1805 |
| India         | 0.1600 | 0.1420 | 0.1779 |
| India         | 0.1618 | 0.1437 | 0.1799 |
| India         | 0.1621 | 0.1440 | 0.1802 |
| Iran          | 0.1624 | 0.1443 | 0.1805 |
| Iran          | 0.1623 | 0.1442 | 0.1804 |
| Iran          | 0.1625 | 0.1444 | 0.1807 |
| Iran          | 0.1629 | 0.1448 | 0.1810 |
| Iran          | 0.1622 | 0.1441 | 0.1803 |
| Iran          | 0.1627 | 0.1446 | 0.1808 |
| Iran          | 0.1627 | 0.1444 | 0.1809 |
| Iran          | 0.1629 | 0.1448 | 0.1810 |
| Iran          | 0.1625 | 0.1443 | 0.1807 |

|          |        |        |        |
|----------|--------|--------|--------|
| Iran     | 0.1619 | 0.1438 | 0.1801 |
| Iran     | 0.1619 | 0.1438 | 0.1800 |
| Iran     | 0.1625 | 0.1444 | 0.1806 |
| Japan    | 0.1624 | 0.1443 | 0.1806 |
| Japan    | 0.1616 | 0.1435 | 0.1797 |
| Japan    | 0.1620 | 0.1439 | 0.1801 |
| Japan    | 0.1625 | 0.1443 | 0.1806 |
| Japan    | 0.1626 | 0.1445 | 0.1807 |
| Japan    | 0.1628 | 0.1447 | 0.1809 |
| Japan    | 0.1627 | 0.1445 | 0.1809 |
| Japan    | 0.1626 | 0.1445 | 0.1807 |
| Japan    | 0.1617 | 0.1436 | 0.1798 |
| Japan    | 0.1625 | 0.1444 | 0.1806 |
| Japan    | 0.1627 | 0.1445 | 0.1809 |
| Japan    | 0.1627 | 0.1446 | 0.1809 |
| Korea    | 0.1630 | 0.1449 | 0.1811 |
| Kuwait   | 0.1624 | 0.1442 | 0.1805 |
| Lebanon  | 0.1628 | 0.1446 | 0.1809 |
| Lebanon  | 0.1619 | 0.1438 | 0.1800 |
| Pakistan | 0.1623 | 0.1441 | 0.1804 |
| Pakistan | 0.1612 | 0.1431 | 0.1793 |
| Pakistan | 0.1586 | 0.1409 | 0.1763 |



|              |        |        |        |
|--------------|--------|--------|--------|
| Pakistan     | 0.1628 | 0.1442 | 0.1813 |
| Pakistan     | 0.1615 | 0.1434 | 0.1796 |
| Pakistan     | 0.1613 | 0.1433 | 0.1794 |
| Pakistan     | 0.1589 | 0.1411 | 0.1767 |
| Philippines  | 0.1621 | 0.1440 | 0.1802 |
| Saudi Arabia | 0.1623 | 0.1442 | 0.1804 |
| Saudi Arabia | 0.1621 | 0.1440 | 0.1802 |
| Saudi Arabia | 0.1625 | 0.1444 | 0.1807 |
| Saudi Arabia | 0.1623 | 0.1443 | 0.1804 |
| Saudi Arabia | 0.1623 | 0.1442 | 0.1804 |
| Saudi Arabia | 0.1626 | 0.1444 | 0.1807 |
| Tajikistan   | 0.1618 | 0.1437 | 0.1798 |
| Thailand     | 0.1623 | 0.1442 | 0.1804 |
| Turkey       | 0.1624 | 0.1443 | 0.1805 |
| Turkey       | 0.1618 | 0.1437 | 0.1800 |
| Turkey       | 0.1617 | 0.1436 | 0.1799 |
| Turkey       | 0.1626 | 0.1444 | 0.1808 |
| Turkey       | 0.1630 | 0.1448 | 0.1812 |
| Turkey       | 0.1600 | 0.1421 | 0.1780 |
| Vietnam      | 0.1626 | 0.1445 | 0.1807 |
| Vietnam      | 0.1620 | 0.1439 | 0.1801 |
| Yemen        | 0.1625 | 0.1444 | 0.1806 |

|         |        |        |        |
|---------|--------|--------|--------|
| Yemen   | 0.1623 | 0.1442 | 0.1804 |
| Yemen   | 0.1624 | 0.1443 | 0.1805 |
| Yemen   | 0.1622 | 0.1441 | 0.1802 |
| Albania | 0.1623 | 0.1442 | 0.1804 |
| Belgium | 0.1628 | 0.1446 | 0.1809 |
| Denmark | 0.1621 | 0.1440 | 0.1802 |
| France  | 0.1623 | 0.1442 | 0.1803 |
| France  | 0.1631 | 0.1449 | 0.1813 |
| Germany | 0.1629 | 0.1448 | 0.1810 |
| Germany | 0.1629 | 0.1446 | 0.1812 |
| Greece  | 0.1620 | 0.1440 | 0.1801 |
| Greece  | 0.1626 | 0.1445 | 0.1807 |
| Greece  | 0.1615 | 0.1434 | 0.1795 |
| Italy   | 0.1627 | 0.1445 | 0.1808 |
| Italy   | 0.1625 | 0.1443 | 0.1807 |
| Italy   | 0.1623 | 0.1441 | 0.1804 |
| Italy   | 0.1622 | 0.1440 | 0.1804 |
| Italy   | 0.1614 | 0.1433 | 0.1795 |
| Italy   | 0.1626 | 0.1444 | 0.1807 |
| Italy   | 0.1619 | 0.1438 | 0.1801 |
| Italy   | 0.1622 | 0.1441 | 0.1803 |
| Italy   | 0.1623 | 0.1442 | 0.1804 |

|                  |        |        |        |
|------------------|--------|--------|--------|
| Italy            | 0.1610 | 0.1429 | 0.1790 |
| Italy            | 0.1619 | 0.1438 | 0.1800 |
| Italy            | 0.1614 | 0.1433 | 0.1795 |
| Italy            | 0.1612 | 0.1432 | 0.1793 |
| Italy            | 0.1612 | 0.1432 | 0.1793 |
| Norway           | 0.1626 | 0.1445 | 0.1807 |
| Portugal         | 0.1629 | 0.1447 | 0.1811 |
| Romania          | 0.1620 | 0.1439 | 0.1801 |
| Romania          | 0.1614 | 0.1433 | 0.1795 |
| Romania          | 0.1617 | 0.1436 | 0.1799 |
| Russia           | 0.1610 | 0.1430 | 0.1791 |
| Spain            | 0.1629 | 0.1448 | 0.1810 |
| Spain            | 0.1626 | 0.1445 | 0.1807 |
| Spain            | 0.1625 | 0.1444 | 0.1806 |
| UK               | 0.1607 | 0.1427 | 0.1787 |
| UK               | 0.1630 | 0.1448 | 0.1813 |
| UK               | 0.1629 | 0.1447 | 0.1810 |
| UK               | 0.1619 | 0.1438 | 0.1800 |
| UK               | 0.1626 | 0.1444 | 0.1807 |
| Northern Ireland | 0.1623 | 0.1442 | 0.1803 |
| UK               | 0.1627 | 0.1446 | 0.1808 |
| Yugoslavia       | 0.1628 | 0.1447 | 0.1809 |

|                  |        |        |        |
|------------------|--------|--------|--------|
| Yugoslavia       | 0.1628 | 0.1447 | 0.1809 |
| Kiribati         | 0.1592 | 0.1413 | 0.1771 |
| Nauru            | 0.1615 | 0.1434 | 0.1796 |
| Multicenter      | 0.1614 | 0.1434 | 0.1795 |
| USA              | 0.1621 | 0.1440 | 0.1802 |
| USA              | 0.1621 | 0.1440 | 0.1801 |
| USA              | 0.1624 | 0.1443 | 0.1805 |
| USA              | 0.1606 | 0.1426 | 0.1786 |
| USA              | 0.1614 | 0.1433 | 0.1795 |
| USA              | 0.1621 | 0.1440 | 0.1802 |
| Brazil           | 0.1621 | 0.1440 | 0.1801 |
| China            | 0.1614 | 0.1433 | 0.1795 |
| China            | 0.1624 | 0.1443 | 0.1805 |
| China, Hong Kong | 0.1610 | 0.1430 | 0.1791 |
| China, Taiwan    | 0.1579 | 0.1403 | 0.1756 |
| China, Taiwan    | 0.1615 | 0.1435 | 0.1795 |
| China, Taiwan    | 0.1594 | 0.1415 | 0.1773 |
| China, Taiwan    | 0.1604 | 0.1424 | 0.1784 |
| China, Taiwan    | 0.1610 | 0.1430 | 0.1790 |
| China, Taiwan    | 0.1610 | 0.1430 | 0.1790 |
| China, Taiwan    | 0.1620 | 0.1440 | 0.1801 |
| China, Taiwan    | 0.1578 | 0.1402 | 0.1755 |

|                  |        |        |        |
|------------------|--------|--------|--------|
| Iran             | 0.1618 | 0.1438 | 0.1799 |
| Japan            | 0.1620 | 0.1439 | 0.1801 |
| Malaysia         | 0.1615 | 0.1434 | 0.1796 |
| Thailand         | 0.1618 | 0.1437 | 0.1799 |
| Greece           | 0.1617 | 0.1436 | 0.1797 |
| Italy            | 0.1621 | 0.1440 | 0.1802 |
| Italy            | 0.1607 | 0.1427 | 0.1787 |
| Italy            | 0.1613 | 0.1432 | 0.1793 |
| Italy            | 0.1612 | 0.1432 | 0.1793 |
| Italy            | 0.1612 | 0.1431 | 0.1792 |
| Norway           | 0.1619 | 0.1438 | 0.1801 |
| Northern Ireland | 0.1621 | 0.1440 | 0.1802 |
| Poland           | 0.1617 | 0.1436 | 0.1798 |
| Romania          | 0.1617 | 0.1436 | 0.1798 |
| Romania          | 0.1613 | 0.1432 | 0.1794 |
| Romania          | 0.1613 | 0.1432 | 0.1794 |
| Spain            | 0.1585 | 0.1408 | 0.1762 |
| Spain            | 0.1595 | 0.1416 | 0.1774 |
| Yugoslavia       | 0.1609 | 0.1429 | 0.1790 |
| Yugoslavia       | 0.1616 | 0.1436 | 0.1797 |
| UK               | 0.1626 | 0.1445 | 0.1807 |
| UK               | 0.1618 | 0.1438 | 0.1799 |

|               |        |        |        |
|---------------|--------|--------|--------|
| UK            | 0.1616 | 0.1435 | 0.1797 |
| UK            | 0.1619 | 0.1438 | 0.1799 |
| UK            | 0.1612 | 0.1432 | 0.1793 |
| Australia     | 0.1616 | 0.1435 | 0.1796 |
| USA           | 0.1627 | 0.1446 | 0.1808 |
| USA           | 0.1621 | 0.1440 | 0.1802 |
| USA           | 0.1624 | 0.1443 | 0.1805 |
| USA           | 0.1620 | 0.1439 | 0.1801 |
| USA           | 0.1625 | 0.1443 | 0.1806 |
| USA           | 0.1620 | 0.1440 | 0.1801 |
| China, Taiwan | 0.1622 | 0.1441 | 0.1803 |
| China, Taiwan | 0.1623 | 0.1442 | 0.1804 |
| China, Taiwan | 0.1608 | 0.1427 | 0.1788 |
| China, Taiwan | 0.1614 | 0.1434 | 0.1795 |
| China, Taiwan | 0.1615 | 0.1434 | 0.1796 |
| China, Taiwan | 0.1617 | 0.1436 | 0.1798 |
| China, Taiwan | 0.1609 | 0.1428 | 0.1789 |
| China, Taiwan | 0.1609 | 0.1428 | 0.1789 |
| China, Taiwan | 0.1613 | 0.1432 | 0.1794 |
| China, Taiwan | 0.1624 | 0.1443 | 0.1805 |
| China, Taiwan | 0.1621 | 0.1441 | 0.1802 |
| China, Taiwan | 0.1620 | 0.1439 | 0.1801 |

|           |        |        |        |
|-----------|--------|--------|--------|
| France    | 0.1620 | 0.1439 | 0.1801 |
| Italy     | 0.1618 | 0.1437 | 0.1799 |
| Romania   | 0.1614 | 0.1433 | 0.1795 |
| Romania   | 0.1614 | 0.1433 | 0.1795 |
| Spain     | 0.1621 | 0.1440 | 0.1802 |
| Australia | 0.1626 | 0.1444 | 0.1807 |
| Combined  | 0.1619 | 0.1439 | 0.1800 |

**Table S8: Methods for anti-HDV antibody used in included studies**

| Location      | Year | Marker                                             | Assay                | Manufacturer                                         |
|---------------|------|----------------------------------------------------|----------------------|------------------------------------------------------|
| Benin         | 1990 | HDV antibodies                                     | EIA                  | Abbott Laboratories, North Chicago, USA              |
| Benin         | 2014 | anti-HDV                                           | EIA                  | ETI-AB-DELTAK-2, DiaSorin, Saluggia, Italy           |
| Ethiopia      | 1986 | Anti-delta                                         | RIA                  | Abbott Laboratories, Stockholm, Sweden               |
| Gabon         | 2016 | anti-delta (total)                                 | ~                    | Abbott/Murex Diagnostic Division, Wiesbaden, Germany |
| Gabon         | 2008 | anti-delta                                         | ~                    | Abbott, Wiesbaden, Germany                           |
| Gabon         | 1995 | Anti-delta and hepatitis delta virus antigen (HDV) | EIA                  | Hepanostika HDV; Organon.                            |
| Mauritania    | 2012 | Hepatitis Delta antibodies                         | ELISA                | Diasorin, Antony, France                             |
| Mauritania    | 2012 | Anti-HDV                                           | ELISA                | Diasorin, Antony, France                             |
| Niger         | 1987 | Anti-Delta                                         | ~                    | Abbott Laboratories (USA)                            |
| USA           | 1990 | anti-delta                                         | ~                    | Abbott Laboratories                                  |
| Brazil        | 1988 | anti-HDV                                           | EIA                  | Disease Control, Atlanta, Georgia, USA               |
| Brazil        | 1995 | anti-HD                                            | ELISA                | Abbott                                               |
| Brazil        | 2005 | antibody to HDV                                    | ~                    | Abbott, Abbott Park, IL                              |
| Colombia      | 2011 | anti-HDV                                           | ~                    | ~                                                    |
| Colombia      | 2015 | anti-HDV IgM/IgG                                   | ELISA                | DIA.PRO, Italy                                       |
| Venezuela     | 2010 | anti-HDV                                           | EIA: ETI-AB-DELTAK-2 | DiaSorin, Italy                                      |
| Venezuela     | 2010 | anti-HDV                                           | EIA: ETI-AB-DELTAK-2 | DiaSorin, Italy                                      |
| China         | 2016 | anti-HDV IgG                                       | ELISA kit            | Wantai Biological Pharmacy, Beijing, China           |
| China         | 1987 | anti-HD                                            | RIA                  | Abbott Laboratories, North Chicago, 11               |
| China         | 2001 | anti-HDV                                           | ~                    | Beijing zhongshan biotechnology company              |
| China         | 2005 | anti-HDV IgG                                       | ELISA                | Henan Huamei Bioengineering Co., Ltd.                |
| China, Taiwan | 1989 | anti-HDV                                           | RIA                  | Abbott Laboratories                                  |
| China, Taiwan | 1988 | anti-HDV                                           | ~                    | Abbott Laboratories, North Chicago, IL               |
| Iran          | 2008 | anti-HDV                                           | ELISA                | Radim SpA, Pomezia, Italy                            |
| Iran          | 2012 | anti-HDV                                           | ELISA                | Biovendor, Germany                                   |
| Japan         | 2000 | anti-HDV IgG                                       | EIA                  | Abbott                                               |
| Japan         | 1997 | anti-HDV                                           | RIA                  | Dinabot, Tokyo, Japan                                |
| Japan         | 1989 | anti-HDV                                           | RIA                  | Abbott Laboratories, North Chicago, Illinois         |
| Pakistan      | 2016 | anti-HDV                                           | ELISA                | MBS-SRL, Milano, Italy                               |
| Saudi Arabia  | 1986 | Anti-delta                                         | RIA                  | Abbott, Ill., USA                                    |
| Saudi Arabia  | 2004 | anti-delta IgG                                     | EIA                  | Abbott                                               |
| Saudi Arabia  | 2004 | anti-delta IgG                                     | EIA                  | Abbott                                               |
| Turkey        | 2014 | total anti-delta antibody                          | EIA                  | the Alisei system (Radim, Italy)                     |
| Vietnam       | 2007 | Anti-HDV                                           | ETI-ABDELTAK-2       | DiaSorin, Saluggia, Italy                            |



|             |      |                                                    |                                                     |                                                          |
|-------------|------|----------------------------------------------------|-----------------------------------------------------|----------------------------------------------------------|
| Yemen       | 1993 | Anti-HDV, total antibody to delta antigen          | EIA                                                 | Abbott                                                   |
| Yemen       | 1993 | Anti-HDV, total antibody to delta antigen          | EIA                                                 | Abbott                                                   |
| Yemen       | 1993 | Anti-HDV, total antibody to delta antigen          | EIA                                                 | Abbott                                                   |
| Albania     | 1995 | anti-HDV                                           | ELISA ETI-AB Deltak                                 | Sorin, Saluggia, Italy                                   |
| France      | 2013 | HDV antibodies (Ab)                                | ETI-AB-DELTAK-2 assay                               | Diasorin, Saluggia, Italy                                |
| Greece      | 1987 | anti-HDV                                           | RIA                                                 | Abbott lab                                               |
| Italy       | 2012 | anti-HDV                                           | ELISA ETI-AB-DELTAK-2 (anti-HD EIA)                 | Diasorin                                                 |
| Italy       | 2008 | anti-HDV                                           | EIA                                                 | ~                                                        |
| Romania     | 2010 | anti HDV IgG antibodies                            | ELISA                                               | DRG, Germany                                             |
| Yugoslavia  | 1993 | anti-HDV antibody                                  | EIA                                                 | Abbott                                                   |
| Australia   | 2013 | HDV-Ab                                             | EIA/ (PCR)                                          | ~                                                        |
| Nauru       | 1989 | anti-HDV                                           | RIA microtitre solid-phase radioimmunoassay (SPRIA) | self-produced                                            |
| multicenter | 1988 | Anti-HDV                                           | ELISA                                               | Abbott                                                   |
| Benin       | 1990 | HDV antibodies                                     | EIA                                                 | Abbott                                                   |
| Benin       | 2014 | anti-HDV antibodies                                | EIA : ETI-AB-DELTAK-2                               | DiaSorin, Saluggia, Italy                                |
| Ethiopia    | 1986 | Anti-Delta                                         | RIA                                                 | ~                                                        |
| Gabon       | 2016 | anti-delta (total)                                 | ~                                                   | Abbott/Murex                                             |
| Gabon       | 2008 | anti-delta                                         | ~                                                   | Murex (Abbott, Wiesbaden, Germany).                      |
| Gabon       | 1995 | Anti-delta (and hepatitis delta virus antigen)     | EIA                                                 | Organon                                                  |
| Ghana       | 2014 | anti-delta                                         | ELISA                                               | Globe Diagnostics, Italy                                 |
| Mauritania  | 2012 | Hepatitis Delta antibodies                         | ELISA                                               | Diasorin, Antony, France                                 |
| Mauritania  | 2012 | Hepatitis Delta antibodies                         | ELISA                                               | Diasorin, Antony, France                                 |
| Mauritania  | 2012 | Total HDV Ab                                       | ETI-AB-DELTA-2                                      | DiaSorin S.A., Antony, France                            |
| Niger       | 1987 | Anti-D                                             | ~                                                   | Abbott                                                   |
| Niger       | 2016 | (Total anti-HDV antibodies (IgG and IgM) )         | ELISA                                               | ETI-AB-DELTAK-2, Dia-Sorin, Italy/QIAgen, Hilden,Germany |
| Egypt       | 2013 | IgG antibodies to hepatitis delta virus (HDV)      | ELISA                                               | DiaSorin, Italy                                          |
| Egypt       | 2003 | anti-HDV antibodies (HDV RNA)                      | EIA                                                 | Abbott Diagnostic Division, Germany                      |
| Kenya       | 1986 | delta Ag/anti-delta                                | RIA                                                 | self-produced                                            |
| Somalia     | 1991 | anti-delta/ (delta antigen )                       | RIA/ (EIA)                                          | Abbott/(Nochtech)                                        |
| Zimbabwe    | 1988 | anti-HD                                            | ELISA                                               | Abbott Laboratories,Chicago, IL                          |
| Tunisia     | 2016 | anti-HDV antibodies (IgG)                          | EIA                                                 | Globe Diagnostics®, Italy                                |
| Tunisia     | 2015 | total anti-HDV                                     | ELISA                                               | InGen-France                                             |
| Canada      | 1986 | anti-HDV                                           | EIA                                                 | Abbott Laboratories, North Chicago, Illinois             |
| USA         | 1990 | Anti-delta                                         | ~                                                   | Abbott                                                   |
| USA         | 2013 | HDV antigen or anti-HDV                            | ~                                                   | Quest assays                                             |
| USA         | 1988 | IgG and IgM antibodies: anti-delta ( δ ) antibody. | RIA                                                 | ~                                                        |
| USA         | 1988 | IgM antibodies                                     | RIA                                                 | Govindarajan S,Smedile A                                 |
| USA         | 1988 | IgM antibodies                                     | RIA                                                 | Govindarajan S,Smedile A                                 |
| USA         | 2015 | anti-HDV antibody (HDV Ab), HDV RNA                | ~                                                   | ~                                                        |
| Argentina   | 1987 | anti-Delta                                         | RIA                                                 | Abbott                                                   |

|                  |      |                                                                                                 |                 |                                                                                 |
|------------------|------|-------------------------------------------------------------------------------------------------|-----------------|---------------------------------------------------------------------------------|
| Brazil           | 1988 | anti-HDV                                                                                        | ELISA           | ~                                                                               |
| Brazil           | 1995 | anti-HDV                                                                                        | EIA             | Abbott                                                                          |
| Brazil           | 2014 | anti-HD IgG                                                                                     | ELISA kit       | DiaSorin, Saluggia, Italy                                                       |
| Brazil           | 2012 | ant-HD IgG                                                                                      | ELISA           | DiaSorin, S.p.A., Saluggia, Italy                                               |
| Brazil           | 2014 | anti-HD                                                                                         | ELISA           | DiaSorin, Italy                                                                 |
| Brazil           | 2016 | anti-HD                                                                                         | ELISA           | DiaSorin, Italy                                                                 |
| Colombia         | 2011 | Anti-HDV                                                                                        | ELISA           | DiaSorin, Italy                                                                 |
| Colombia         | 2015 | anti-HDV IgM/IgG                                                                                | ELISA           | DIA.PRO, Italy                                                                  |
| Peru             | 1996 | anti-HD                                                                                         | EIA             | all Abbott, Abbott Park, IL                                                     |
| Venezuela        | 2010 | anti-HDV                                                                                        | ETI-AB-DELTAK-2 | DiaSorin, Italy                                                                 |
| Venezuela        | 2010 | anti-HDV                                                                                        | ETI-AB-DELTAK-2 | DiaSorin, Italy                                                                 |
| Venezuela        | 1992 | total antibody to hepatitis delta antigen, immunoglobulin M antibody to hepatitis delta antigen | EIA             | self-produced                                                                   |
| Venezuela        | 1992 | total antibody to hepatitis delta antigen, immunoglobulin M antibody to hepatitis delta antigen | EIA             | self-produced                                                                   |
| China            | 2016 | anti-HDV IgG                                                                                    | ELISA           | Wantai Biological Pharmacy, Beijing, China                                      |
| China            | 1987 | anti-HD                                                                                         | RIA             | Abbott Laboratories, North Chicago, 111                                         |
| China            | 2001 | anti-HDV                                                                                        | ELISA           | Beijing zhongshan biotechnology company                                         |
| China            | 2000 | anti-HD IgM                                                                                     | EIA             | Beijing Gunda Biotechnology Co., Ltd.                                           |
| China            | 2014 | anti-HD IgM                                                                                     | ELISA           | Zhongshan Biotech Co, China                                                     |
| China            | 1988 | Anti-HD                                                                                         | ELISA           | Abbott Laboratories, North Chicago, Illinois, USA) and Deltassay (Noctech, Ltd) |
| China            | 1998 | Anti-HD                                                                                         | ELISA           | Institute of virus research, Chinese academy of preventive medicine             |
| China            | 2012 | anti-HDV                                                                                        | ELISA           | Abbott murex                                                                    |
| China            | 2012 | anti-HDV                                                                                        | ELISA           | Wantai Biological Pharmacy, Beijing, China                                      |
| China            | 2000 | Anti-HD                                                                                         | ELISA           | Henan Institute of Medical Sciences                                             |
| China            | 2013 | Anti-HD                                                                                         | ELISA           | Shanghai Kehua Biotechnology Co., Ltd.                                          |
| China            | 2003 | anti-HDV IgG /IgM                                                                               | ~               | Shandong Weifang 3V group company                                               |
| China            | 2002 | Anti-HD                                                                                         | ELISA           | Luoyang Huamei Bioengineering Co., Ltd.                                         |
| China            | 2000 | anti-HDV                                                                                        | RIA             | Beijing northern immune reagents Research Institute                             |
| China, Hong Kong | 1992 | anti-HDV                                                                                        | EIA             | Abbott Laboratories, Chicago, IL                                                |
| China, Taiwan    | 1989 | anti-HDV                                                                                        | RIA             | Abbott Laboratories                                                             |
| China, Taiwan    | 1988 | anti-HDV                                                                                        | ~               | Abbott Laboratories, North Chicago, IL                                          |
| China, Taiwan    | 1988 | Anti-Delta                                                                                      | RIA             | Abbott Laboratories                                                             |
| China, Taiwan    | 1989 | anti-HD                                                                                         | RIA             | Abbott Laboratories, North Chicago. 111, USA                                    |
| China, Taiwan    | 1989 | anti-HD                                                                                         | RIA             | Abbott Laboratories, North Chicago. 111, USA                                    |
| China, Taiwan    | 1990 | total and IgM anti-HD, HDAg                                                                     | EIA             | Noctech Ltd, Dublin, Ireland                                                    |
| China, Taiwan    | 1989 | anti-HD                                                                                         | RIA             | Abbott Laboratories, Chicago, Illinois                                          |
| China, Taiwan    | 1988 | anti-HD                                                                                         | RIA             | Abbott Laboratories, Chicago, IL                                                |
| China, Taiwan    | 1990 | anti-HD (total)                                                                                 | RIA             | Abbott Laboratories, Chicago, IL                                                |
| China, Taiwan    | 1997 | anti-HDV                                                                                        | RIA             | Abbott Laboratories, Chicago, IL, USA                                           |

|          |      |                                                                        |                                                  |                                                                     |
|----------|------|------------------------------------------------------------------------|--------------------------------------------------|---------------------------------------------------------------------|
| India    | 2015 | IgG anti-HDV                                                           | EIA                                              | Wantai, Beijing, China and Diasorin, Saluggia, Italy                |
| India    | 2005 | IgG antibodies against HDV                                             | ~                                                | Abbott Laboratories, USA                                            |
| India    | 2008 | anti-HDV IgM+IgG                                                       | ~                                                | DiaSorin, Saluggia, Italy                                           |
| India    | 1992 | anti-HDV                                                               | ELISA                                            | Abbott                                                              |
| India    | 1988 | anti-HDV+HDAg                                                          | ELISA                                            | Abbott+Dr Mario Rizzetto                                            |
| India    | 1995 | anti-HDV IgG                                                           | ELISA                                            | Abbott Laboratories (USA)                                           |
| Iran     | 2008 | anti-HDV                                                               | ELISA                                            | Radim SpA, Pomezia, Italy                                           |
| Iran     | 2012 | anti-HDV                                                               | ELISA                                            | Biovendor, Germany                                                  |
| Iran     | 2014 | anti-HDV IgG                                                           | ELISA                                            | Diapro Italy                                                        |
| Iran     | 2013 | anti-HDV                                                               | ELISA                                            | DIA.PRO                                                             |
| Iran     | 2008 | anti-HDV (IgG +IgM)                                                    | ELISA                                            | DIA. PRO, Italy                                                     |
| Iran     | 2011 | total anti-HDV                                                         | ELISA                                            | Diapro, Italy                                                       |
| Iran     | 2009 | anti-HDV (IgG +IgM)                                                    | EIA                                              | Abbott Chicago, IL, USA                                             |
| Iran     | 2014 | anti-HDAb                                                              | ELISA                                            | Radim SpA, Rome, Italy                                              |
| Iran     | 2009 | Anti-HDV antibodies                                                    | ELISA                                            | DiaSorin, Italy                                                     |
| Iran     | 2013 | anti-HDV                                                               | ELISA                                            | DiaSorin, Italy                                                     |
| Iran     | 2010 | anti-HDV antibodies (IgM, IgG)                                         | ELISA                                            | ETI-ABDELTAK-2; Diasorin, Dietzenbach, Germany                      |
| Iran     | 1990 | anti-HDV                                                               | EIA                                              | Abbott Laboratories North Chicago, Ill.                             |
| Japan    | 2000 | anti-HDV IgG                                                           | EIA                                              | Abbott                                                              |
| Japan    | 1997 | anti-HDV                                                               | RIA                                              | Dinabot, Tokyo, Japan                                               |
| Japan    | 1989 | anti-HDV                                                               | RIA                                              | Abbott Laboratories, North Chicago, Illinois                        |
| Japan    | 1993 | anti-HDV                                                               | EIA                                              | Cambridge Biotech, Dublin, Ireland                                  |
| Japan    | 1993 | anti-HDV                                                               | EIA                                              | Cambridge Biotech, Dublin, Ireland                                  |
| Japan    | 1992 | anti-HDV                                                               | ELISA                                            | Sanofi Fuji Levio                                                   |
| Japan    | 1990 | anti-HD                                                                | RIA                                              | Abbott Laboratories                                                 |
| Japan    | 1987 | anti-HD                                                                | RIA                                              | Abbott Laboratories                                                 |
| Japan    | 1998 | anti-HDV                                                               | RIA                                              | Dinabot, Tokyo                                                      |
| Japan    | 1995 | anti-HDV                                                               | RIA                                              | Dinabot, Tokyo                                                      |
| Japan    | 1991 | anti-HDV                                                               | RIA                                              | Abbott Laboratories                                                 |
| Japan    | 1990 | anti-HDV                                                               | RIA/reconfirmed with an enzyme immunoassay (EIA) | Abbott Laboratories/Diagnostics Pasteur, Marnes-la-Cofuette, France |
| Korea    | 2011 | anti-HDV                                                               | EIA ETI-AB-DELTAK-2                              | Diasorin, Vercelli, Italy                                           |
| Kuwait   | 1988 | d antigen /Anti-HDV antibody                                           | RIA                                              | self-produced                                                       |
| Lebanon  | 2006 | anti-HDV                                                               | ELISA                                            | Abbott Diagnostic Division, Wiesbaden, Germany                      |
| Lebanon  | 1987 | (Hepatitis delta antigen (HDAg)) and total antibody to HD-Ag (anti-HD) | RIA                                              | self-produced                                                       |
| Pakistan | 2016 | anti-HDV                                                               | ELISA                                            | MBS-SRL, Milano, Italy                                              |
| Pakistan | 2014 | anti-HDV                                                               | ELISA                                            | DiaSorin                                                            |
| Pakistan | 2009 | anti-HDV                                                               | EIA                                              | AXSym Abbott                                                        |
| Pakistan | 2005 | Anti-Delta                                                             | EIA                                              | Abbott Chicago                                                      |
| Pakistan | 2011 | anti-HDV                                                               | ~                                                | ~                                                                   |
| Pakistan | 2010 | anti-HDV                                                               | 3rd generation Enzyme ELISA                      | DIA.PRO, Diagnostic Bioprobes Srl Italy                             |

|                    |      |                                                             |                     |                                                               |
|--------------------|------|-------------------------------------------------------------|---------------------|---------------------------------------------------------------|
| Philippin          | 1987 | anti-delta                                                  | RIA                 | Abbott Laboratories North Chicago, Illinois, USA              |
| Saudi Arabia       | 1987 | anti-delta                                                  | RIA                 | Abbott Laboratories North Chicago, Illinois, USA              |
| Saudi Arabia       | 1986 | anti-HD (total)                                             | RIA                 | Abbott                                                        |
| Saudi Arabia       | 2004 | delta antibody (IgG)                                        | EIA                 | Abbott                                                        |
| Saudi Arabia       | 2004 | delta antibody (IgG)                                        | EIA                 | Abbott                                                        |
| Saudi Arabia       | 1988 | anti-HDV                                                    | ELISA               | Abbott                                                        |
| Saudi Arabia       | 1986 | anti-delta                                                  | RIA                 | Abbott                                                        |
| Tajikistan         | 2008 | anti-HDV                                                    | ELISA               | RPC Diagnostics Systems, Nizhnyi Novgorod, Russia             |
| Thailand           | 2002 | anti-HDV                                                    | EIA ETI-ABDELTA-2   | Diasorin, Vercelli, Italy                                     |
| Turkey             | 2014 | total anti-delta antibody                                   | MEIA                | microplate analyzer and the Alisei system (Radim, Italy)      |
| Turkey             | 1991 | anti-HDV                                                    | ELISA               | Abbott Laboratories, North Chicago, Ill                       |
| Turkey             | 2006 | anti-delta                                                  | micro-ELISA         | Diapro, Diagnostic Bioprobes Srl Via Columella, Milano, Italy |
| Turkey             | 2012 | anti-HDV                                                    | EIA                 | Diasorin, Saluggia, Italy                                     |
| Turkey             | 2011 | anti-delta                                                  | ELISA               | Murex, Abbott, Portugal                                       |
| Vietnam            | 2007 | anti-HDV                                                    | EIA ETI-AB DELTAK-2 | DiaSorin, Saluggia, Italy                                     |
| the Yemen Republic | 1993 | total anti-delta antibody                                   | EIA                 | Abbott                                                        |
| the Yemen Republic | 1993 | total anti-delta antibody                                   | EIA                 | Abbott                                                        |
| the Yemen Republic | 1993 | total anti-delta antibody                                   | EIA                 | Abbott                                                        |
| the Yemen Republic | 1993 | total anti-delta antibody                                   | EIA                 | Abbott                                                        |
| Albania            | 1995 | anti-HDV                                                    | micro-ELISA         | Sorin, Saluggia, Italy                                        |
| Belgium            | 2013 | anti-HDV                                                    | EIA ETI-ABDELTA-2   | DiaSorin S.p.A. Turin, Italy                                  |
| Denmark            | 1991 | anti-HDV                                                    | RIA                 | Abbott Laboratories, North Chicago, Ill., USA                 |
| France             | 1989 | d antigen /Anti-HDV antibody                                | EIA                 | Oss, The Netherlands                                          |
| France             | 2013 | anti-HDV                                                    | EIA ETI-AB DELTAK-2 | DiaSorin, Saluggia, Italy                                     |
| Germany            | 1986 | HDAg and anti-HD                                            | Immunofluorescence  | self-produced                                                 |
| Germany            | 2012 | anti-HDV IgG                                                | ETI-AB-DeltaK-2     | DiaSorin S.p.A, Saluggia (Vercelli), Italy                    |
| Greece             | 1987 | anti-HDV                                                    | RIA                 | Abbott Lab                                                    |
| Greece             | 1986 | HDAg IgM and total antibodies to HDAg                       | RIA                 | self-produced                                                 |
| Greece             | 1990 | total antibody                                              | RIA                 | Sorin Biomedica, Italy                                        |
| Italy              | 2012 | ETI-AB-DELTAK-2 (anti-HD EIA) and (ETI-DELTAK-2 (HDAg EIA)) | EIA                 | DiaSorin, Saluggia, Italy                                     |
| Italy              | 2008 | anti-HDV                                                    | EIA                 | ~                                                             |
| Italy              | 2016 | anti-HDV                                                    | EIA                 | ~                                                             |
| Italy              | 1997 | anti-HD                                                     | ~                   | ~                                                             |
| Italy              | 1992 | anti-HD                                                     | ~                   | ~                                                             |
| Italy              | 2000 | Anti-HDV antibodies                                         | ELISA               | ~                                                             |
| Italy              | 1988 | HDAg and antidelata antibody                                | EIA                 | Abbott                                                        |
| Italy              | 1988 | HDAg and antidelata antibody                                | EIA                 | Abbott                                                        |
| Italy              | 1988 | total anti-delta                                            | RIA                 | Abbott                                                        |
| Italy              | 1988 | total anti-delta                                            | RIA                 | Abbott                                                        |
| Italy              | 1991 | anti-HDV (total)                                            | EIA                 | Abbott                                                        |

|                  |      |                                       |                     |                                                                 |
|------------------|------|---------------------------------------|---------------------|-----------------------------------------------------------------|
| Italy            | 1990 | anti-HDV                              | ELISA               | Abbott                                                          |
| Italy            | 1991 | anti-HD                               | RIA                 | Sorin, Saluggia, Italy                                          |
| Norway           | 1986 | Anti-delta                            | RIA                 | self-produced                                                   |
| Portugal         | 2016 | anti-HDV                              | ~                   | ~                                                               |
| Romania          | 2010 | anti HDV IgG antibodies               | ELISA               | DRG, Germany                                                    |
| Romania          | 2015 | anti HDV IgG antibodies               | ELISA               | ~                                                               |
| Romania          | 2013 | anti-HDV IgG                          | PCR                 | SmarTest Diagnostics; Orgenics, Yavne, Israel                   |
| Russia           | 2000 | HDVAg and anti-HDV antibody           | RIA                 | self-produced                                                   |
| Spain            | 1995 | anti-HDV IgG                          | RIA                 | Sorin, Saluggia, Italy                                          |
| Spain            | 1988 | anti-HD                               | RIA                 | Abbott                                                          |
| Spain            | 1988 | anti-HD                               | RIA                 | Abbott                                                          |
| UK               | 2015 | Anti-HDV                              | EIA ETI-AB DELTAK-2 | DiaSorin, Saluggia, Italy                                       |
| UK               | 2015 | Anti-HDV                              | EIA ETI-AB DELTAK-2 | DiaSorin, Saluggia, Italy                                       |
| UK               | 2013 | total antibodies against HDV anti-HDV | EIA ETI-AB DELTAK-2 | DiaSorin, Saluggia, Italy                                       |
| UK               | 1985 | Anti-delta                            | RIA                 | kindly performed by Dr MRizzetto, Department of Medicine, Turin |
| UK               | 2007 | HDV Ab and IgM anti-HDV               | EIA                 | DiaSorin, Saluggia, Italy                                       |
| Northern Ireland | 1991 | anti-HD                               | Microelisa          | Teknika Hepanostika                                             |
| UK               | 1989 | delta antibody                        | EIA                 | Noctech Ltd., Dublin                                            |
| Yugoslavia       | 1993 | Anti-delta                            | EIA                 | Abbott                                                          |
| Kiribati         | 1989 | Anti-HDV                              | RIA                 | Abbott Laboratories, Chicago                                    |
| Nauru            | 1989 | Anti-HDV                              | RIA                 | self-produced                                                   |
| Multicenter      | 1988 | Anti-HDV                              | ELISA               | Abbott                                                          |
| USA              | 1995 | Anti-HDV                              | EIA                 | Abbott Laboratories, Abbott Park, Illinois                      |
| USA              | 1988 | IgG and IgM antibodies                | RIA                 | self-produced                                                   |
| USA              | 1988 | IgG and IgM antibody to HDV           | RIA                 | self-produced                                                   |
| USA              | 1988 | IgG and IgM antibody to HDV           | RIA                 | self-produced                                                   |
| USA              | 2005 | anti-HDV                              | EIA                 | Abbott Park, Illinois                                           |
| USA              | 1990 | anti-HDV                              | ~                   | Abbott                                                          |
| Brazil           | 1999 | anti-HDV                              | EIA                 | Abbott Laboratories, Diagnostic Division, Chicago, IL, USA      |
| China            | 2016 | anti-HDV IgG                          | ELISA               | Wantai Biological Pharmacy, Beijing, China                      |
| China, Hong Kong | 1992 | anti-HDV                              | ~                   | ~                                                               |
| China, Taiwan    | 1988 | anti-HDV                              | RIA                 | Abbott Laboratories                                             |
| China, Taiwan    | 1989 | anti-HDV                              | RIA                 | Abbott Laboratories                                             |
| China, Taiwan    | 1989 | anti-HDV                              | RIA                 | Abbott Laboratories                                             |
| China, Taiwan    | 2002 | anti-HDV                              | EIA                 | Abbott Laboratories                                             |
| China, Taiwan    | 1986 | anti-HDV                              | RIA                 | Abbott Laboratories                                             |
| China, Taiwan    | 2003 | anti-HDV                              | RIA                 | Abbott Laboratories                                             |
| China, Taiwan    | 2003 | anti-HDV                              | RIA                 | Abbott Laboratories                                             |
| China, Taiwan    | 1990 | anti-HDV                              | RIA                 | Abbott Laboratories                                             |
| Iran             | 2008 | total anti-HDV (IgG +IgM)             | ELISA               | DIA. PRO, Italy                                                 |

|                  |      |                                              |                                  |                                         |
|------------------|------|----------------------------------------------|----------------------------------|-----------------------------------------|
| Japan            | 1989 | anti-HDV                                     | RIA                              | Abbott Laboratories                     |
| Malaysia         | 1994 | anti-HDV                                     | EIA                              | Abbott Laboratories                     |
| Thailand         | 2002 | Anti-HDV                                     | EIA ETI-AB DELTAK-2              | Diasorin, Vercelli, Italy               |
| Greece           | 1987 | anti-HDV                                     | RIA                              | Abbott Laboratories                     |
| Italy            | 2016 | anti-HDV                                     | EIA                              | ~                                       |
| Italy            | 1988 | anti-HDV                                     | RIA                              | ~                                       |
| Italy            | 1994 | anti-HD and IgM anti-HD                      | ETI-AB-DELTAK and ETI-DELTA IgMK | Sorin                                   |
| Italy            | 1987 | anti-HDV                                     | solidphase radioimmunoassay      | Sorin, Saluggia, Italy                  |
| Italy            | 1988 | HDAg and anti-delta antibody                 | EIA                              | Abbott Laboratories                     |
| Norway           | 1986 | Anti-delta                                   | EIA                              | self-produced                           |
| Northern Ireland | 1991 | Anti-HDV                                     | microELISA                       | Organon Teknika Hepanostika             |
| Poland           | 1992 | Anti-HDV                                     | microELISA                       | Organon Teknika                         |
| Romania          | 2015 | anti-HDV IgG antibody                        | ELISA                            | ~                                       |
| Romania          | 2015 | anti-HDV IgG antibody                        | ELISA                            | ~                                       |
| Romania          | 2015 | anti-HDV IgG antibody                        | ELISA                            | ~                                       |
| Spain            | 1988 | anti-HDV                                     | RIA                              | Abbott Laboratories                     |
| Spain            | 1995 | anti-HDV IgG antibody                        | RIA                              | Sorin, Saluggia, Italy                  |
| Yugoslavia       | 1993 | Anti-delta                                   | EIA                              | Abbott                                  |
| UK               | 1989 | Anti-delta                                   | EIA                              | Noctech Ltd., Dublin                    |
| UK               | 1989 | Anti-delta                                   | EIA                              | Noctech Ltd., Dublin                    |
| UK               | 1989 | Anti-delta                                   | EIA                              | Noctech Ltd., Dublin                    |
| UK               | 2013 | anti-HDV                                     | EIA ETI-AB DELTAK-2              | Diasorin, Italy                         |
| UK               | 1992 | total anti-HDAg                              | RIA                              | Abbott Laboratories, Chicago, IL, USA   |
| Australia        | 1989 | total antibody to HDV                        | EIA                              | Abbott Laboratories, North Chicago, USA |
| USA              | 1989 | Total anti-delta and IgM-specific anti-delta | EIA                              | self-produced                           |
| USA              | 1988 | IgG and IgM antibodies                       | solid-phase-capture RIA          | self-produced                           |
| USA              | 1988 | IgG and IgM antibody to HDV                  | solid-phase-capture RIA          | self-produced                           |
| USA              | 1988 | IgG and IgM antibody to HDV                  | solid-phase-capture RIA          | self-produced                           |
| USA              | 1988 | anti-HD                                      | solid-phase-capture RIA          | self-produced                           |
| USA              | 1990 | Anti-delta                                   | ~                                | Abbott Laboratories                     |
| China, Taiwan    | 1997 | Anti-delta                                   | RIA                              | Abbott Laboratories, Chicago, IL, USA   |
| China, Taiwan    | 1997 | Anti-delta                                   | RIA                              | Abbott Laboratories, Chicago, IL, USA   |
| China, Taiwan    | 1997 | Anti-delta                                   | RIA                              | Abbott Laboratories, Chicago, IL, USA   |
| China, Taiwan    | 1997 | Anti-delta                                   | RIA                              | Abbott Laboratories, Chicago, IL, USA   |
| China, Taiwan    | 1997 | Anti-delta                                   | RIA                              | Abbott Laboratories, Chicago, IL, USA   |
| China, Taiwan    | 1997 | Anti-delta                                   | RIA                              | Abbott Laboratories, Chicago, IL, USA   |
| China, Taiwan    | 2003 | anti-HDV                                     | RIA                              | Abbott Laboratories, Chicago, IL        |
| China, Taiwan    | 2003 | anti-HDV                                     | RIA                              | Abbott Laboratories, Chicago, IL        |
| China, Taiwan    | 2003 | anti-HDV                                     | RIA                              | Abbott Laboratories, Chicago, IL        |
| China, Taiwan    | 2003 | anti-HDV                                     | RIA                              | Abbott Laboratories, Chicago, IL        |

|               |      |                                                  |       |                                        |
|---------------|------|--------------------------------------------------|-------|----------------------------------------|
| China, Taiwan | 2003 | anti-HDV                                         | RIA   | Abbott Laboratories, Chicago, IL       |
| China, Taiwan | 2003 | anti-HDV                                         | RIA   | Abbott Laboratories, Chicago, IL       |
| French        | 1989 | total and/or IgM anti-hepatitis delta antibodies | EIA   | Organon Teknika (Oss, The Netherlands) |
| Italy         | 1988 | anti-HDV                                         | ELISA | Abbott                                 |
| Romania       | 2015 | anti-HDV IgG antibody                            | ELISA | ~                                      |
| Romania       | 2015 | anti-HDV IgG antibody                            | ELISA | ~                                      |
| Spain         | 1988 | anti-HDV                                         | RIA   | Abbott Laboratories                    |
| Australia     | 1989 | total antibody to HDV                            | EIA   | Abbott                                 |

“~ “ means ” unknown”

”self-produced” means that the assays mainly used the improved procedure based on previous methods (Rizzetto et al., 1980 or Govindarajan S, Smedile A ).

**Table S9. Citations for all sources used for estimating the prevalence of HDV in general population and HBsAg-positive population.**

1. Zanchetta N, Vigano P, Ferrario MP, Priuli GB, Djigbenoude O, Nardi GP. B and Delta hepatitis virus infection in a population of West Africa. *Revista do Instituto de Medicina Tropical de São Paulo* 1990;32:36-40.
2. De Paschale M, Ceriani C, Cerulli T, et al. Prevalence of HBV, HDV, HCV, and HIV infection during pregnancy in northern Benin. *J Med Virol* 2014;86:1281-7.
3. Tsega E, Mengesha B, Hansson BG, Lindberg J, Nordenfelt E. HEPATITIS A, B, AND DELTA INFECTION IN ETHIOPIA: A SEROLOGIC SURVEY WITH DEMOGRAPHIC DATA. *American Journal of Epidemiology* 1986;123:344-51.
4. Francois-Souquiere S, Makuwa M, Bisvigou U, Kazanji M. Epidemiological and molecular features of hepatitis B and hepatitis delta virus transmission in a remote rural community in central Africa. *Infect Genet Evol* 2016;39:12-21.
5. Makuwa M, Caron M, Souquiere S, Malonga-Mouelet G, Mahe A, Kazanji M. Prevalence and genetic diversity of hepatitis B and delta viruses in pregnant women in Gabon: molecular evidence that hepatitis delta virus clade 8 originates from and is endemic in central Africa. *J Clin Microbiol* 2008;46:754-6.
6. Richardlenoble D, Traore O, Kombila M, Roingard P, Dubois F, Goudeau A. Hepatitis B, C, D, and E markers in rural equatorial African villages (Gabon). *American Journal of Tropical Medicine & Hygiene* 1995;53:338-41.
7. Mansour W, Malick FZ, Sidiya A, et al. Prevalence, risk factors, and molecular epidemiology of hepatitis B and hepatitis delta virus in pregnant women and in patients in Mauritania. *J Med Virol* 2012;84:1186-98.
8. Soubiran G, Bras ML, Marini P, Sekou H. High HBsAg and anti-delta carrier rate among asymptomatic Africans living on the campus of the University of Niamey, Niger. *Transactions of the Royal Society of Tropical Medicine & Hygiene* 1987;81:998-1000.
9. Barry MA, Gleavy D, Herd K, Schwingl PJ, Werner BG. Prevalence of markers for hepatitis B and hepatitis D in a municipal house of correction. *American Journal of Public Health* 1990;80:471-3.
10. Fonseca J, Simonetti S, Schatzmyr H, Castejón M, Cesário A, Simonetti J. Prevalence of infection with hepatitis delta virus (HDV) among carriers of hepatitis B surface antigen in Amazonas state. 1988.
11. Arboleda M, Castilho MC, Fonseca JC, Albuquerque BC, Saboia RC, Yoshida CF. Epidemiological aspects of hepatitis B and D virus infection in the northern region of Amazonas, Brazil. *Transactions of the Royal Society of Tropical Medicine & Hygiene* 1995;89:481.
12. Viana S, Paraná R, Moreira RC, Compri AP, Macedo V. High prevalence of hepatitis B virus and hepatitis D virus in the western Brazilian Amazon. *American Journal of Tropical Medicine & Hygiene* 2005;73:808.
13. Alvarodomora MV, Fernandez MF, Gomesgouvêa MS, Rs DAN, Carrilho FJ, Pinho JR. Hepatitis B (HBV), hepatitis C (HCV) and hepatitis delta (HDV) viruses in the Colombian population--how is the epidemiological situation? *Plos One* 2011;6:e18888.
14. di Filippo Villa D, Cortes-Mancera F, Payares E, et al. Hepatitis D virus and hepatitis B virus infection in Amerindian communities of the Amazonas state, Colombia. *Virol J* 2015;12:172.
15. Duarte MC, Cardona N, Poblete F, et al. A comparative epidemiological study of hepatitis B and



hepatitis D virus infections in Yanomami and Piaroa Amerindians of Amazonas State, Venezuela. *Trop Med Int Health* 2010;15:924-33.

16. Takahashi M, Nishizawa T, Gotanda Y, et al. High Prevalence of Antibodies to Hepatitis A and E Viruses and Viremia of Hepatitis B, C, and D Viruses among Apparently Healthy Populations in Mongolia. *Clinical and Vaccine Immunology* 2004;11:392-8.

17. Chen F, Zhang J, Guo F, et al. Hepatitis B, C, and D virus infection showing distinct patterns between injection drug users and the general population. *J Gastroenterol Hepatol* 2017;32:515-20.

18. Wang DQ, Cheng HH, Minuk GY, et al. Delta hepatitis virus infection in China. *International Journal of Epidemiology* 1987;16:79.

19. Gan Xiaolin. Investigation of the infection status of type 3 virus in railway dietetic workers. *The Journal of preventive medical information* 2001;17:379 (In Chinese).

20. Jianrong L, Jing W, Kunlun T, Yixin W, Lei Z, Hanju H. Epidemiology of hepatitis B, C, D and G viruses and cytokine levels among intravenous drug users. *Journal of Huazhong University of Science and Technology [Medical Sciences]* 2006;26:221-4.

21. Guo AQ, Tang RD, Liu SY, Feng GX. Detection Results and Analysis of HAV,HCV,HDV,HEV Antibody. *Hainan Medical Journal* 2005.

22. Chung DC, Ko YC, Chen CJ, Chen ER, Wu CC, Wu PS. Seroepidemiology of hepatitis b virus, hepatitis d virus, and human immunodeficiency virus infections among parenteral drug abusers in southern taiwan. *Journal of Medical Virology* 1989;28:215-8.

23. Chung DC, Ko YC, Chen CJ, et al. Seroepidemiological studies on hepatitis B and D viruses infection among five ethnic groups in southern Taiwan. *Journal of Medical Virology* 1988;26:411.

24. Roshandel G, Semnani SN, Besharat S, et al. Prevalence of hepatitis D virus infection in hepatitis B surface antigen-positive subjects in Golestan province, northeast Iran. *Journal of microbiology, immunology, and infection = Wei mian yu gan ran za zhi* 2008;41:227.

25. Ghadir MR, Belbasi M, Heidari A, et al. Prevalence of hepatitis d virus infection among hepatitis B virus infected patients in qom province, center of iran. *Hepat Mon* 2012;12:205-8.

26. Arakawa, Moriyama, Taira, et al. Molecular analysis of hepatitis D virus infection in Miyako Island, a small Japanese island. *Journal of Viral Hepatitis* 2010;7:375-81.

27. Sakugawa H, Nakasone H, Shokita H, et al. Seroepidemiological study on hepatitis delta virus infection in the Irabu Islands, Okinawa, Japan. *J Gastroenterol Hepatol* 1997;12:299-304.

28. Kiyosawa K, Oofusa H, Saitoh H, et al. Seroepidemiology of hepatitis a, b, and d viruses and human t-lymphocyte tropic viruses in japanese drug abusers. *Journal of Medical Virology* 1989;29:160-3.

29. Jalil I, Arshad M, Rafeque Z, et al. Seroprevalence of HDV among non-hospitalized HBsAg positive patients from KPK-region of Pakistan. *Asian Pacific Journal of Tropical Biomedicine* 2016;6:609-13.

30. Ashraf SJ, Arya SC, Arendrup M, et al. Frequencies of hepatitis B, delta and HTLV-III virus markers in Saudi Arabia. *Liver International* 1986;6:73.

31. Al-Traif I, Ali A, Dafalla M, Al-Tamimi W, Qassem L. Prevalence of hepatitis delta antibody among HBsAG carriers in Saudi Arabia. *Annals of Saudi Medicine* 2004;24:343.

32. Uzun B, Sener AG, Gungor S, Afsar I, Demirci M. Evaluation of hepatitis delta virus (HDV) infection in blood donors in western Turkey. *Transfus Apher Sci* 2014;50:388-91.

33. Nguyen VT, McLaws ML, Dore GJ. Highly endemic hepatitis B infection in rural Vietnam. *J Gastroenterol Hepatol* 2007;22:2093-100.

34. el Guneid AM, Gunaid AA, O'Neill AM, Zureikat NI, Coleman JC, Murray-Lyon IM. Prevalence of hepatitis B, C, and D virus markers in Yemeni patients with chronic liver disease. *Journal of Medical*

Virology 2010;40:330-3.

35. Da VG, Nuri B, Ghisetti V, et al. Epidemiology of hepatitis B and delta virus infection in Albania: an approach to universal vaccination. *Research in Virology* 1995;146:245-8.

36. Servant-Delmas A, Le Gal F, Gallian P, Gordien E, Laperche S. Increasing prevalence of HDV/HBV infection over 15 years in France. *J Clin Virol* 2014;59:126-8.

37. Roumeliotoukarayannis A, Tassopoulos N, Karpodini E, Trichopoulou E, Kotsianopoulou M, Papaevangelou G. Prevalence of HBV, HDV and HIV infections among intravenous drug addicts in Greece. *European Journal of Epidemiology* 1987;3:143-6.

38. De Paschale M, Manco MT, Belvisi L, et al. Epidemiology of hepatitis D virus (HDV) infection in an urban area of northern Italy. *Infection* 2012;40:485-91.

39. Sagnelli E, Stroffolini T, Mele A, Imperato M, Almasio PL, Italian Hospitals' Collaborating G. Chronic hepatitis B in Italy: New features of an old disease—approaching the universal prevalence of hepatitis B e antigen—negative cases and the eradication of hepatitis D infection. *Clinical infectious diseases* 2008;46:110-3.

40. Voiculescu M, Iliescu L, Ionescu C, et al. A cross-sectional epidemiological study of HBV, HCV, HDV and HEV prevalence in the SubCarpathian and South-Eastern regions of Romania. *Journal of Gastrointestinal & Liver Diseases Jgld* 2010;19:43.

41. Radović M, Taseski J. Anti-HCV and anti-HDV antibodies in blood donors and selected risk groups. *Transfusion Science* 1993;14:323-7.

42. Shadur B, Maclachlan J, Cowie B. Hepatitis D virus in Victoria 2000-2009. *Internal medicine journal* 2013;43:1081-7.

43. Speed BR, Dimitrakakis M, Thoma K, Gust ID. Control of HBV and HDV infection in an isolated Pacific Island: 1. Pattern of infection. *Journal of Medical Virology* 1989;29:13–9.

44. Brindle RJ, Eglin RP, Parsons AJ, Hill AVS, Selkon JB. HTLV-1, HIV-1, hepatitis B and hepatitis delta in the Pacific and South-East Asia: a serological survey. *Epidemiology and Infection* 2009;100:153.

45. Asmah RH, Boamah I, Afodzinu M, et al. Prevalence of hepatitis d infection in patients with hepatitis B virus-related liver diseases in Accra, Ghana. *West Afr J Med* 2014;33:32-6.

46. Mansour W, Bollahi MA, Hamed CT, et al. Virological and epidemiological features of hepatitis delta infection among blood donors in Nouakchott, Mauritania. *J Clin Virol* 2012;55:12-6.

47. Opaleye OO, Japhet OM, Adewumi OM, et al. Molecular epidemiology of hepatitis D virus circulating in Southwestern Nigeria. *Virol J* 2016;13:61.

48. Gomaa NI, Metwally LA, Nemr N, Younis S. Seroprevalence of HDV infection in HBsAg positive population in Ismailia, Egypt. *Egypt J Immunol* 2013;20:23-8.

49. Saady N, Sugauchi F, Tanaka Y, et al. Genotypes and phylogenetic characterization of hepatitis B and delta viruses in Egypt. *J Med Virol* 2003;70:529-36.

50. Greenfield C, Farci P, Osidiana V, et al. Hepatitis delta virus infection in Kenya. Its geographic and tribal distribution. *American Journal of Epidemiology* 1986;123:416-23.

51. Aceti A, Mohamed OM, Paparo BS, et al. High prevalence of anti-hepatitis delta virus antibody in chronic liver disease in Somalia. *Transactions of the Royal Society of Tropical Medicine & Hygiene* 1991;85:541.

52. Tswana SA, Laher S. Detection of anti-delta antibodies among acute hepatitis B virus-infected patients. *Journal of Medical Virology* 1988;25:471-4.

53. Salma M, Yosr K, Sana A, Amel L, Jalel B, Naila H. Hepatitis D Virus Infection Among Hepatitis B Surface Antigen Carriers and in “Isolated anti-HBc” Antibodies Profile in Central Tunisia. *Hepatitis*

Monthly 2016;16:e32354.

54. Yacoubi L, Briclher S, Mansour W, et al. Molecular epidemiology of hepatitis B and Delta virus strains that spread in the Mediterranean North East Coast of Tunisia. *J Clin Virol* 2015;72:126-32.

55. Ratnam S, Head CB, Butler RW. Lack of evidence of hepatitis D (delta) infection in Newfoundland and Labrador. *CMAJ : Canadian Medical Association journal = journal de l'Association medicale canadienne* 1986;134:905.

56. Gish RG, Yi DH, Kane S, et al. Coinfection with hepatitis B and D: epidemiology, prevalence and disease in patients in Northern California. *J Gastroenterol Hepatol* 2013;28:1521-5.

57. Rector WG, Jr., Govindarajan S, Penley KA, Judson FN. Delta hepatitis in Denver. *West J Med* 1988;149:40-2.

58. Decock KM, Jones B, Govindarajan S, Redeker AG. Prevalence of hepatitis delta (delta) virus infection. A seroepidemiologic study. *Western Journal of Medicine* 1988;148:307.

59. Kushner T, Serper M, Kaplan DE. Delta hepatitis within the Veterans Affairs medical system in the United States: Prevalence, risk factors, and outcomes. *J Hepatol* 2015;63:586-92.

60. Fay O, Tanno H, Gatti H, et al. Anti-Delta antibody in various HBsAg positive argentine populations. *Journal of Medical Virology* 1987;22:257-62.

61. Crispim MAE, Fraiji NA, Campello SC, Schriefer NA, Stefani MMA, Kiesslich D. Molecular epidemiology of hepatitis B and hepatitis delta viruses circulating in the Western Amazon region, North Brazil. *Bmc Infectious Diseases* 2014;14:94.

62. Braga WS, Castilho Mda C, Borges FG, et al. Hepatitis D virus infection in the Western Brazilian Amazon - far from a vanishing disease. *Revista da Sociedade Brasileira de Medicina Tropical* 2012;45:691.

63. Barros LM, Gomes-Gouvea MS, Pinho JR, et al. Hepatitis Delta virus genotype 8 infection in Northeast Brazil: inheritance from African slaves? *Virus research* 2011;160:333-9.

64. Santos MD, Gomes-Gouvea MS, Nunes JD, et al. The hepatitis delta genotype 8 in Northeast Brazil: The North Atlantic slave trade as the potential route for infection. *Virus research* 2016;224:6-11.

65. Casey JL, Niro GA, Engle RE, et al. Hepatitis B virus (HBV)/hepatitis D virus (HDV) coinfection in outbreaks of acute hepatitis in the Peruvian Amazon basin: the roles of HDV genotype III and HBV genotype F. *Journal of Infectious Diseases* 1996;174:920.

66. Hadler SC, Monzon MAD, Rivero D, Perez M, Bracho A, Fields H. Epidemiology and Long-Term Consequences of Hepatitis Delta Virus Infection in the Yucpa Indians of Venezuela. *American Journal of Epidemiology* 1992;136:1507-16.

67. Xiong Lanshi, Tang Ning, Chang Maohua. Hepatitis B patients infected Hepatitis D, E, G virus. *World Chinese Journal of Digestion* 2000;8:832-3 (In Chinese).

68. Liao B, Zhang F, Lin S, et al. Epidemiological, clinical and histological characteristics of HBV/HDV co-infection: a retrospective cross-sectional study in Guangdong, China. *PLoS One* 2014;9:e115888.

69. Wang SP, Ding H, Zhao OK. Studies on HDV and HCV infection in plasma donors with positive HBsAg. *Zhonghua Yu Fang Yi Xue Za Zhi* 1994;28:223-4.

70. Mai K, Roggendorf M, Jin Z, et al. Epidemiology of hepatitis  $\delta$  virus infection in China. *Journal of Gastroenterology & Hepatology* 2010;3:373-7.

71. Chen X, Xuan M, Yin Y. Study of HDV infection in Shandong province. *Zhonghua liu xing bing xue za zhi = Zhonghua liuxingbingxue zazhi* 1998;19:138.

72. Shen L, Gu Y, Sun L, et al. Development of a hepatitis delta virus antibody assay for study of the prevalence of HDV among individuals infected with hepatitis B virus in China. *J Med Virol*

2012;84:445-9.

73. Zhang YY, Hao LJ, Rizzetto M, Bonino F, Verme G. Immunohistochemical research on HDV infection in Chinese patients with chronic liver disease. *Journal of Tongji Medical University* 1990;37:411.

74. Li WX, Ding JY, Lu XX, et al. The investigation of hepatitis D virus infection situation in the human with HBsAg in Foshan of Guangdong province. *Zhonghua Shi Yan He Lin Chuang Bing Du Xue Za Zhi* 2012;26:382-3.

75. Zhou Chaofang, Downing, Sheng Huiqin, et al. 266 cases of acute sporadic viral hepatitis etiology. *Guangxi Medical* 2000;22:58-9 (In Chinese).

76. Zhu Yan. Etiological analysis of 137 cases of viral hepatitis. *Chinese Medical Guide*. 2013:612-3 (In Chinese).

77. HE Shan. Analysis of serum markers in 338 patients with viral hepatitis. *Chinese Journal of Primary Medicine and Pharmacy*. 2003;10:760 (In Chinese).

78. Wang Rongtang. Analysis of 202 cases of hepatitis serological test. *Occupation and health*. 2002;18:33-4(In Chinese).

79. WANG Jin, WANG Zhaowen. Detection of 6 types of hepatitis B virus markers in 385 serums. *PLA Journal of Preventive Medicine*. 2000;18:48-9(In Chinese).

80. Lok AS, Wong A, Sporton S, Lai CL, Liu V, Chung HT. Hepatitis D virus superinfection remains a rare occurrence in non-drug abusers in Hong Kong. *Journal of Hepatology* 1992;14:332-4.

81. Chen PJ, Ding-Shinn CMD, Chen CR, et al.  $\delta$  Infection in asymptomatic carriers of hepatitis B surface antigen: Low prevalence of  $\delta$  activity and effective suppression of hepatitis B virus replication. *Hepatology* 1988;8:1121-4.

82. Tai D-I, Liaw Y-F. Hepatitis delta virus infection in southern Taiwan. *Scandinavian journal of infectious diseases* 1989;21:29-31.

83. Tsai JF, Margolis HS, Fields HA, Chang WY, Tsai JH. Hepatitis delta virus superinfection among patients with chronic hepatitis B in southern Taiwan. *Scandinavian Journal of Infectious Diseases* 1990;22:403-5.

84. Chu CM, Shyu WC, Liaw YF. Prevalence and significance of intrahepatic hepatitis delta virus antigen expression in HBeAg-negative patients with chronic type-B hepatitis in Taiwan. *Digestive Diseases & Sciences* 1989;34:1911-5.

85. Wu JC, Lee SD, Tsay SH, et al. Symptomatic anti-HBe positive chronic hepatitis B in Taiwan with special reference to persistent HBV replication and HDV superinfection. *Journal of Medical Virology* 1988;25:141.

86. Liaw YF, Chiu KW, Chu CM, Sheen IS, Huang MJ. Heterosexual transmission of hepatitis delta virus in the general population of an area endemic for hepatitis B virus infection: a prospective study. *Journal of Infectious Diseases* 1990;162:1170-2.

87. Huo TI, Wu JC, Lin RY, Sheng WY, Chang FY, Lee SD. Decreasing hepatitis D virus infection in Taiwan: an analysis of contributory factors. *Journal of Gastroenterology & Hepatology* 1997;12:747.

88. Jat SL, Gupta N, Kumar T, et al. Prevalence of hepatitis D virus infection among hepatitis B virus-infected individuals in India. *Indian J Gastroenterol* 2015;34:164-8.

89. Murhekar MV, Murhekar KM, Arankalle VA, Sehgal SC. Hepatitis delta virus infection among the tribes of the Andaman and Nicobar Islands, India. *Trans R Soc Trop Med Hyg* 2005;99:483-4.

90. Saravanan S, Velu V, Kumarasamy N, et al. Seroprevalence of hepatitis delta virus infection among subjects with underlying hepatic diseases in Chennai, southern India. *Trans R Soc Trop Med Hyg*

2008;102:793-6.

91. Banker DD, Desai P, Brawner TA, Decker RH. Hepatitis delta virus infection in Bombay. *Transactions of the Royal Society of Tropical Medicine & Hygiene* 1987;234:477.

92. Anand AC, Gandhi BM, Acharya SK, Irshad M, Joshi YK, Tandon BN. Hepatitis  $\delta$  virus infection in India. *Journal of Gastroenterology & Hepatology* 1988;3:425-9.

93. Singh V, Goenka MK, Bhasin DK, Kochhar R, Singh K. A study of hepatitis delta virus infection in patients with acute and chronic liver disease from northern India. *Journal of Viral Hepatitis* 1995;2:151.

94. Tahaei SM, Mohebbi SR, Azimzadeh P, et al. Prevalence of hepatitis D virus in hepatitis B virus infected patients referred to Taleghani hospital, Tehran, Iran. *Gastroenterology & Hepatology from Bed to Bench* 2014;7:144.

95. Attaran MS, Sharifi Z, Hosseini SM, Samei S, Ataee Z. Prevalence of hepatitis B and hepatitis D coinfection in asymptomatic blood donors in Iran. *APMIS* 2014;122:243-7.

96. Taghavi SA, Sedighi S, Mehrabani D, Khademolhosseini F. Hepatitis D in Chronic Active Hepatitis B: Prevalence, Liver Enzyme Levels and Histopathology- an Epidemiological Study in Shiraz, Southern Iran, 2003-2004. *Hepatitis Monthly* 2008;8:248-51.

97. Ataei B, Yazdani MR, Kalantari H, et al. Hepatitis D virus infection in Isfahan, central Iran: Prevalence and risk factors among chronic HBV infection cases. *Hepatitis Monthly* 2011;11:269-72.

98. Hajiani E, Hashemi SJ, Jalali F. Seroprevalence of delta hepatitis in patients with chronic hepatitis B and its clinical impact in Khuzestan Province, Southwest Iran. *Hepatitis Monthly* 2009;9:287-92.

99. Keshvari M, Alavian SM, Aghaee B, et al. Seroepidemiology and clinical features of hepatitis delta among HBsAg carriers: a study from Hepatitis Clinic of Iranian Blood Transfusion Organization. *Transfus Med* 2014;24:411-7.

100. Somi MH, Farhang S, Miri SM, Pouri AA, Mjidi G, Alavian SM. The frequency of hepatitis D virus in patients with hepatitis B in Iran: an increasing rate? *Trop Doct* 2009;39:154-6.

101. Bakhshipour A, Mashhadi M, Mohammadi M, Nezam SK. Seroprevalence and risk factors of hepatitis delta virus in chronic hepatitis B virus infection in Zahedan. *Acta Med Iran* 2013;51:260-4.

102. Alizadeh AHM, Ranjbar M, Tehrani ASS, et al. Seroprevalence of Hepatitis D Virus and its Risk Factors in the West of Iran. *Journal of Microbiology, Immunology and Infection* 2010;43:519-23.

103. Rezvan H, Taroyan S, Forouzandeh B, Fadaiee S, Azordegan F. A study on delta virus infection and its clinical impact in Iran. *Infection* 1990;18:26-8.

104. Iwanami E, Yano M, Koga M, Shirahama S, Tsuda T. Local spread of HDV infection transiently occurring in Japan. *Journal of Gastroenterology & Hepatology* 1993;8:565.

105. Tamura I, Koda T, Kurimura O. [Detection of hepatitis delta virus (HDV) markers in HBV carriers]. *Kansenshōgaku Zasshi the Journal of the Japanese Association for Infectious Diseases* 1992;66:1226.

106. Tamura I, Ichimura H, Koda T, Katayama S, Kurimura O, Kurimura T. Hepatitis  $\delta$  virus infection in different time periods in Japan. *Journal of gastroenterology and hepatology* 1990;5:407-10.

107. Tamura I, Ichimura H, Itoh Y, Kurimura O, Kurimura T. Prevalence of antibody to delta antigen among HBV carriers in Japan. *Journal of Medical Virology* 1987;22:217-21.

108. Nakasone H, Sakugawa H, Shokita H, et al. Prevalence and clinical features of hepatitis delta virus infection in the Miyako Islands, Okinawa, Japan. *Journal of Gastroenterology* 1998;33:850-4.

109. Sakugawa H, Nakasone H, Shokita H, et al. Seroepidemiological study of hepatitis delta virus infection in Okinawa, Japan. *Journal of medical virology* 1995;45:312-5.

110. Koda T, Tamura I, Ichimura H, et al. A long-term follow-up of five patients with hepatitis delta



virus in Japan. *Journal of International Medical Research* 1991;19:484-92.

111. Tamura I, Kurimura O, Koda T, et al. Risk of liver cirrhosis and hepatocellular carcinoma in subjects with hepatitis B and delta virus infection: a study from Kure, Japan. *Journal of Gastroenterology & Hepatology* 1993;8:433.

112. Kim HS, Kim SJ, Park HW, et al. Prevalence and clinical significance of hepatitis D virus co-infection in patients with chronic hepatitis B in Korea. *J Med Virol* 2011;83:1172-7.

113. Al-Kandari S, Nordenfelt E, Al-Nakib B, Hansson BGR, Ljunggren K, Al-Nakib W. Hepatitis Delta Virus Infection in Acute Hepatitis in Kuwait. *Scandinavian Journal of Infectious Diseases* 2009;20:15-9.

114. Ramia S, El-Zaatari M, Sharara AI, Ramlawi F, Farhat B. Current prevalence of hepatitis delta virus (HDV) infection and the range of HDV genotypes in Lebanon. *Epidemiol Infect* 2007;135:959-62.

115. Farci P, Burroughs AK, Thomas HC, Shamma'a M. Delta hepatitis in Lebanon: Prevalence studies and a report on six siblings with chronic delta-positive active hepatitis. *Journal of hepatology* 1987;4:224-8.

116. Abbasi A, Bhutto AR, Butt N, Mahmood K. HDV seroprevalence in HBsAg positive patients. *Journal of the College of Physicians and Surgeons--Pakistan : JCPSP* 2014;24:624.

117. Seetlani NK, Abbas Z, Raza S, Yakoob J, Jafiris W. Prevalence of hepatitis D in HBsAg positive patients visiting liver clinics. *Jpma the Journal of the Pakistan Medical Association* 2009;59:434.

118. Mumtaz K, Hamid SS, Adil S, et al. Epidemiology and clinical pattern of hepatitis delta virus infection in Pakistan. *J Gastroenterol Hepatol* 2005;20:1503-7.

119. Shaikh MA, Shaikh WM, Solangi GA, Shaikh BA, Soomro MA. Frequency of hepatitis D virus infection in hepatitis B surface antigen-positive liver diseases. *Journal of the College of Physicians and Surgeons--Pakistan : JCPSP* 2011;21:23.

120. Khan AU, Waqar M, Akram M, et al. True prevalence of twin HDV-HBV infection in Pakistan: a molecular approach. *Virology journal* 2011;8:420.

121. Zaidi G, Idrees M, Malik FA, et al. Prevalence of hepatitis delta virus infection among hepatitis b virus surface antigen positive patients circulating in the largest province of pakistan. *Virology Journal* 2010;7:283.

122. Ramia S, Elhazmi MA, Vivian PA, Waller DK, Mushahwar IK, Frösner GG. Delta agent infection in Riyadh, Saudi Arabia. *Transactions of the Royal Society of Tropical Medicine & Hygiene* 1987;81:317-8.

123. Ramia S, Bahakim H. Perinatal transmission of hepatitis B virus-associated hepatitis D virus. *Annales De L'institut Pasteur Virology* 1988;139:285-90.

124. Elhazmi MA, Ramia S. Epidemiology of Delta Agent Infection in Arabia: Geographical Distribution and Prevalence of Anti-Delta. *Vox Sanguinis* 1986;50:216.

125. Khan A, Kurbanov F, Tanaka Y, et al. Epidemiological and clinical evaluation of hepatitis B, hepatitis C, and delta hepatitis viruses in Tajikistan. *J Med Virol* 2008;80:268-76.

126. Theamboonlers A, Hansurabhanon T, Verachai V, Chongsrisawat V, Poovorawan Y. Hepatitis D Virus Infection in Thailand: HDV Genotyping by RT-PCR, RFLP and Direct Sequencing. *Infection* 2002;30:140-4.

127. Balik I, Onul M, Tekeli E, Caredda F. Epidemiology and clinical outcome of hepatitis D virus infection in Turkey. *European Journal of Epidemiology* 1991;7:48.

128. Dulger AC, Suvak B, Gonullu H, et al. High prevalence of chronic hepatitis D virus infection in Eastern Turkey: urbanization of the disease. *Arch Med Sci* 2016;12:415-20.

129. Celen MK, Ayaz C, Hosoglu S, Geyik MF, Ulug M. Anti-hepatitis delta virus seroprevalence and risk factors in patients with hepatitis B in Southeast Turkey. *Saudi Medical Journal* 2006;27:617-20.
130. Kose S, Ece G, Gozaydin A, Turken M. Study on seroprevalence of hepatitis delta in a regional hospital in western Turkey. *Journal of Infection in Developing Countries* 2012;6:782.
131. Bahcecioglu IH, Aygun C, Gozel N, Poyrazoglu OK, Bulut Y, Yalniz M. Prevalence of hepatitis delta virus (HDV) infection in chronic hepatitis B patients in eastern Turkey: still a serious problem to consider. *J Viral Hepat* 2011;18:518-24.
132. Sy BT, Ratsch BA, Toan NL, et al. High prevalence and significance of hepatitis D virus infection among treatment-naive HBsAg-positive patients in Northern Vietnam. *PLoS One* 2013;8:e78094.
133. Ho E, Deltenre P, Nkuize M, et al. Coinfection of hepatitis B and hepatitis delta virus in Belgium: a multicenter BASL study. Prospective epidemiology and comparison with HBV mono-infection. *J Med Virol* 2013;85:1513-7.
134. Krogsgaard K, Wantzin P, Mathiesen L, Ring-Larsen H. Chronic Evolution of Acute Hepatitis B: The Significance of Simultaneous Infections with Hepatitis C and D. *Scandinavian Journal of Gastroenterology* 2009;26:275-80.
135. Servant-Delmas A, Gal FL, Gallian P, Gordien E, Laperche S. Increasing prevalence of HDV/HBV infection over 15 years in France. *Journal of Clinical Virology the Official Publication of the Pan American Society for Clinical Virology* 2014;59:126-8.
136. Roggendorf M, Gmelin K, Zoulek G, et al. Epidemiological studies on the prevalence of hepatitis Delta virus infections in the Federal Republic of Germany. *Journal of Hepatology* 1986;2:230-6.
137. Reinheimer C, Doerr HW, Berger A. Hepatitis delta: on soft paws across Germany. *Infection* 2012;40:621-5.
138. Tassopoulos NC, Sjogren MH, Ticehurst JR, et al. Significance of IgM antibody to hepatitis B core antigen in a Greek population with chronic hepatitis B virus infection. *Liver International* 1986;6:275-80.
139. Tassopoulos NC, Koutelou MG, Macagno S, Zorbas P, Rizzetto M. Diagnostic significance of IgM antibody to hepatitis delta virus in fulminant hepatitis B. *Journal of Medical Virology* 1990;30:174-7.
140. Stroffolini T, Sagnelli E, Sagnelli C, et al. Hepatitis delta infection in Italian patients: towards the end of the story? *Infection* 2016.
141. Sagnelli E, Stroffolini T, Ascione A, et al. Decrease in HDV endemicity in Italy. *Journal of hepatology* 1997;26:20.
142. Gaeta GB, Stroffolini T, Chiamonte M, et al. Chronic hepatitis D: a vanishing Disease? An Italian multicenter study. *Hepatology* 2000;32:824-7.
143. Pasetti G, Calzetti C, Antoni AD, Ferrari C, Penna A, Fiaccadori F. Clinical features of hepatitis delta virus infection in a northern italian. *Infection* 1988;16:345-8.
144. Salassa B, Daziano E, Bonino F, et al. Serological diagnosis of hepatitis B and delta virus (HBV/HDV) coinfection. *Journal of Hepatology* 1991;12:10-3.
145. Sapio MD, Caporaso N, Vecchio-Blanco CD, Coltorti M. Prevalence of HBcAg and delta-Ag in liver tissue of patients with HBsAg positive chronic hepatitis. *Liver* 1988;8:236-40.
146. Craxi A, Tinè F, Vinci M, et al. Transmission of hepatitis B and hepatitis delta viruses in the households of chronic hepatitis B surface antigen carriers: a regression analysis of indicators of risk. *American Journal of Epidemiology* 1991;134:641.

147. Gaeta GB, Rapicetta M, Sardaro C, et al. Prevalence of anti-HCV antibodies in patients with chronic liver disease and its relationship to HBV and HDV infections. *Infection* 1990;18:277.
148. Colombo P, Di BF, Magrin S, et al. Smoldering hepatitis B virus replication in patients with chronic liver disease and hepatitis delta virus superinfection. *Journal of Hepatology* 1991;12:64.
149. Siebke JC, Lippe BVD, Hansson BG, Nordenfelt E, Degrå© M. Prevalence and Clinical Effects of Delta Agent: Infections in Norwegian Population Subgroups. *Scandinavian Journal of Infectious Diseases* 1986;18:33-6.
150. Paramés F, Paulo S, Barbeiro P, Sampaio J, Proença H, Melo-Cristino J. Prevalence of hepatitis delta virus infection among hepatitis b virus surface antigen positive patients diagnosed in a Central Hospital in Portugal, a 5 years retrospective study. *Journal of Clinical Virology* 2016;82:S75.
151. Gheorghe L, Csiki IE, Iacob S, et al. Hepatitis Delta Virus Infection in Romania: Prevalence and Risk Factors. *J Gastrointestin Liver Dis* 2015;24:413-21.
152. Popescu GA, Otelea D, Gavriliu LC, et al. Epidemiology of hepatitis D in patients infected with hepatitis B virus in bucharest: a cross-sectional study. *J Med Virol* 2013;85:769-74.
153. Flodgren E, Bengtsson S, Knutsson M, et al. Recent High Incidence of Fulminant Hepatitis in Samara, Russia: Molecular Analysis of Prevailing Hepatitis B and D Virus Strains. *Journal of Clinical Microbiology* 2000;38:3311.
154. Navascués CA, Rodríguez M, Sotorrió NG, et al. Epidemiology of hepatitis D virus infection: changes in the last 14 years. *American Journal of Gastroenterology* 1995;90:1981.
155. Esteban R, Buti M, Jardi J, Guardia J. Epidemiology of delta infection in Spain. *Journal of Medical Virology* 1988;26:327-32.
156. El Bouzidi K, Elamin W, Kranzer K, et al. Hepatitis delta virus testing, epidemiology and management: a multicentre cross-sectional study of patients in London. *J Clin Virol* 2015;66:33-7.
157. William Tong CY, Asher R, Toby M, et al. A re-assessment of the epidemiology and patient characteristics of hepatitis D virus infection in inner city London. *J Infect* 2013;66:521-7.
158. Smith B, Brown I, Muir D, Nutter P. P72 Low rates of testing for delta hepatitis amongst a large hepatitis B cohort. *Basl Abstracts* 2010.
159. Cross TJ, Rizzi P, Horner M, et al. The increasing prevalence of hepatitis delta virus (HDV) infection in South London. *J Med Virol* 2008;80:277-82.
160. Curran RA, O'Neill HJ, Connolly JH. Hepatitis delta virus infection in Northern Ireland 1970-1989. *Ulster Medical Journal* 1991;60:159-63.
161. Turner GC, Panton N, Elise MV. Delta infection and drug abuse in Merseyside. *The Journal of infection* 1989;19:113.
162. Delić D, Gotić M, Oštrić V, et al. Epidemiology of hepatitis D virus (delta) infection in Yugoslavia. *Liver* 1993;13:302-4.
163. Tibbs CJ. Delta hepatitis in kiribati: A pacific focus. *Journal of Medical Virology* 1989;29:130-2.
164. Speed BR, Dimitrakakis M, Thoma K, Gust ID. Control of HBV and HDV infection in an isolated Pacific Island: 1. Pattern of infection. *Journal of Medical Virology* 1989;29:13-9.
165. Tennant F, Moll D. Seroprevalence of hepatitis A, B, C, and D markers and liver function abnormalities in intravenous heroin addicts. *J Addict Dis* 1995;14:35-49.
166. Bialek SR, Bower WA, Mottram K, et al. Risk factors for hepatitis B in an outbreak of hepatitis B and D among injection drug users. *J Urban Health* 2005;82:468-78.
167. Oliveira MLA, Bastos FI, Telles PR, et al. Prevalence and risk factors for HBV, HCV and HDV



infections among injecting drug users from Rio de Janeiro, Brazil. *Brazilian Journal of Medical and Biological Research* 1999;32.

168. Kao JH, Chen PJ, Lai MY, Chen DS. Hepatitis D Virus Genotypes in Intravenous Drug Users in Taiwan: Decreasing Prevalence and Lack of Correlation with Hepatitis B Virus Genotypes. *Journal of Clinical Microbiology* 2002;40:3047-9.

169. Huo TI, Wu JC, Wu SI, et al. Changing seroepidemiology of hepatitis B, C, and D virus infections in high-risk populations. *J Med Virol* 2004;72:41-5.

170. Hsu HM, Wang YF, Lo SH, et al. Hepatitis D virus infection among intravenous drug abusers in Taiwan: analysis of risk factors and liver function tests. *Journal of Medical Virology* 1990;31:76-81.

171. Zuridah H. Hepatitis delta virus in intravenous drug users in Kuala Lumpur. *Med J Malaysia* 1994;49.

172. Mandelli C, Cesana M, Ferroni P, et al. HBV, HDV and HIV infections in 242 drug addicts: two-year follow-up. *European journal of epidemiology* 1988;4:318-21.

173. Coppola RC, Manconi R, Piro R, Martino MLD, Masia G. HCV, HIV, HBV and HDV infections in intravenous drug addicts. *European Journal of Epidemiology* 1994;10:279-83.

174. Conte D, Ferroni P, Lorini GP, et al. HIV and HBV infection in intravenous drug addicts from northeastern Italy. *Journal of Medical Virology* 1987;22:299.

175. Siebke JC, Von dLB, Hansson BG, Nordenfelt E, Degré M. Prevalence and clinical effects of delta agent. Infections in Norwegian population subgroups. *Scandinavian Journal of Infectious Diseases* 1986;18:33-6.

176. Laskus T, Radkowski M, Lup E, et al. Prevalence of markers of hepatotropic viruses among drug addicts in Warsaw, Poland. *Journal of Hepatology* 1992;15:114-7.

177. Smith HM, Alexander GJ, Webb G, McManus T, McFarlane IG, Williams R. Hepatitis B and delta virus infection among "at risk" populations in south east London. *Journal of Epidemiology & Community Health* 1992;46:144-7.

178. Bodsworth NJ, Donovan B, Gold J, Cossart YE. Hepatitis delta virus in homosexual men in Sydney. *Genitourinary Medicine* 1989;65:235-8.

179. Weisfuse IB, Hadler SC, Fields HA, et al. Delta hepatitis in homosexual men in the United States. *Hepatology* 1989;9:872-4.

180. Solomon RE, Kaslow RA, Phair JP, et al. Human immunodeficiency virus and hepatitis delta virus in homosexual men. A study of four cohorts. *Annals of Internal Medicine* 1988;108:51.

181. Pol S, Dubois F, Roingeard P, et al. Hepatitis delta virus infection in French male HBsAg-positive homosexuals. *Hepatology* 1989;10:342.

182. Mele A, Franco E, Caprilli F, et al. Hepatitis B and Delta virus infection among heterosexuals, homosexuals and bisexual men. *European Journal of Epidemiology* 1988;4:488-91.

## References

1. Schweitzer A, Horn J, Mikolajczyk RT, Krause G, Ott JJ. Estimations of worldwide prevalence of chronic hepatitis B virus infection: a systematic review of data published between 1965 and 2013. *Lancet* 2015;386:1546-55.
2. Foupouapouognigni Y, Noah DN, Sartre MT, Njouom R. High prevalence and predominance of hepatitis delta virus genotype 1 infection in Cameroon. *J Clin Microbiol* 2011;49:1162-4.
3. T. Langon, S. Fillon, C. Pichoud, O. Hantz, C. Trépo, Kay A. Analysis of a hepatitis delta virus isolate from the Central African Republic. 1998.
4. Andernach IE, Leiss LV, Tarnagda ZS, et al. Characterization of hepatitis delta virus in sub-Saharan Africa. *J Clin Microbiol* 2014;52:1629-36.
5. Saady N, Sugauchi F, Tanaka Y, et al. Genotypes and phylogenetic characterization of hepatitis B and delta viruses in Egypt. *J Med Virol* 2003;70:529-36.
6. Fouad R, Abdo M, Eldeen HG, et al. Influence of delta virus infection on the virologic status in Egyptian patients with chronic hepatitis B virus genotype D. *J Med Virol* 2016;88:837-42.
7. Makuwa M, Caron M, Souquiere S, Malonga-Mouelet G, Mahe A, Kazanji M. Prevalence and genetic diversity of hepatitis B and delta viruses in pregnant women in Gabon: molecular evidence that hepatitis delta virus clade 8 originates from and is endemic in central Africa. *J Clin Microbiol* 2008;46:754-6.
8. Makuwa M, Mintsá-Ndong A, Souquiere S, Nkoghe D, Leroy EM, Kazanji M. Prevalence and molecular diversity of hepatitis B virus and hepatitis delta virus in urban and rural populations in northern Gabon in central Africa. *J Clin Microbiol* 2009;47:2265-8.
9. Francois-Souquiere S, Makuwa M, Bisvigou U, Kazanji M. Epidemiological and molecular features of hepatitis B and hepatitis delta virus transmission in a remote rural community in central Africa. *Infect Genet Evol* 2016;39:12-21.
10. Mansour W, Malick FZ, Sidiya A, et al. Prevalence, risk factors, and molecular epidemiology of hepatitis B and hepatitis delta virus in pregnant women and in patients in Mauritania. *J Med Virol* 2012;84:1186-98.
11. Mansour W, Bollahi MA, Hamed CT, et al. Virological and epidemiological features of hepatitis delta infection among blood donors in Nouakchott, Mauritania. *J Clin Virol* 2012;55:12-6.
12. Lunel-Fabiani F, Mansour W, Amar AO, et al. Impact of hepatitis B and delta virus co-infection on liver disease in Mauritania: a cross sectional study. *J Infect* 2013;67:448-57.
13. Opaleye OO, Japhet OM, Adewumi OM, et al. Molecular epidemiology of hepatitis D virus circulating in Southwestern Nigeria. *Viol J* 2016;13:61.
14. Yacoubi L, Bricler S, Mansour W, et al. Molecular epidemiology of hepatitis B and Delta virus strains that spread in the Mediterranean North East Coast of Tunisia. *J Clin Virol* 2015;72:126-32.
15. Wenjie T, Meiyun Z, Yi Yanjie, Shengli B, Ji M. Screening and cloning of HDV cDNA from different regions and populations in China and Analysis of Gene Heterogeneity of Antigen coding region. *Virologica Sinica* 1996:244-50.
16. Cloning and sequence analysis of full-length eDNA of hepatitis D virus in China. 2015.
17. C WJ, B CK, M CC, Z CT, I HT, D LS. Genotyping of hepatitis D virus by restriction-fragment length polymorphism and relation to outcome of hepatitis D. 1995.
18. Jaw-Ching Wu, I-Ann Huang, Yi-Hsiang Huang, Jen-Yu Chen, Sheen I-J. Mixed Genotypes Infection With Hepatitis D Virus. 1999.

19. Kao JH, Chen PJ, Lai MY, Chen DS. Hepatitis D Virus Genotypes in Intravenous Drug Users in Taiwan: Decreasing Prevalence and Lack of Correlation with Hepatitis B Virus Genotypes. *Journal of Clinical Microbiology* 2002;40:3047-9.
20. Lu SN, Chen TM, Lee CM, Wang JH, Tung HD, Wu JC. Molecular epidemiological and clinical aspects of hepatitis D virus in a unique triple hepatitis viruses (B, C, D) endemic community in Taiwan. *J Med Virol* 2003;70:74-80.
21. Su CW, Huang YH, Huo TI, et al. Genotypes and Viremia of Hepatitis B and D Viruses Are Associated With Outcomes of Chronic Hepatitis D Patients. *Gastroenterology* 2006;130:1625-35.
22. Chang SY, Yang CL, Ko WS, et al. Molecular Epidemiology of Hepatitis D Virus Infection among Injecting Drug Users with and without Human Immunodeficiency Virus Infection in Taiwan. *Journal of Clinical Microbiology* 2011;49:1083-9.
23. Lin H-H, Lee S, Yu M-L, et al. Epidemiology of Hepatitis Delta Virus infection in HIV-infected individuals in Taiwan. *Retrovirology* 2012;9:P49.
24. Hung C-C, Wu S-M, Lin P-H, et al. Increasing Incidence of Recent Hepatitis D Virus Infection in HIV-Infected Patients in an Area Hyperendemic for Hepatitis B Virus Infection. *Clinical Infectious Diseases* 2014;58:1625-33.
25. Lin H-H, Lee SS-J, Yu M-L, et al. Changing hepatitis D virus epidemiology in a hepatitis B virus endemic area with a national vaccination program. *Hepatology* 2015;61:1870-9.
26. Lee CY, Tsai HC, Lee SS, et al. Higher rate of hepatitis events in patients with human immunodeficiency virus, hepatitis B, and hepatitis D genotype II infection: a cohort study in a medical center in southern Taiwan. *J Microbiol Immunol Infect* 2015;48:20-7.
27. Mohebbi SR, Zali N, Derakhshan F, et al. Molecular epidemiology of hepatitis delta virus (HDV) in Iran: A preliminary report. *Journal of Medical Virology* 2008;80:2092-9.
28. Aghasadeghi MR, Mohraz M, Bahramali G, et al. Frequency and Genotype of Hepatitis D Virus Infection in Patients Infected with HIV and Those Undergoing Hemodialysis. *Hepatitis Monthly* 2013;13.
29. Ghamari S, Alavian SM, Rizzetto M, et al. Prevalence of Hepatitis Delta Virus (HDV) Infection in Chronic Hepatitis B Patients with Unusual Clinical Pictures. *Hepatitis Monthly* 2013;13.
30. Attaran MS, Sharifi Z, Hosseini SM, Samei S, Ataee Z. Prevalence of hepatitis B and hepatitis D coinfection in asymptomatic blood donors in Iran. *APMIS* 2014;122:243-7.
31. Shirvani-Dastgerdi E, Amini-Bavil-Olyae S, Alavian SM, Trautwein C, Tacke F. Comprehensive analysis of mutations in the hepatitis delta virus genome based on full-length sequencing in a nationwide cohort study and evolutionary pattern during disease progression. *Clinical Microbiology and Infection* 2015;21:510.e11-.e23.
32. Meshkat M, Sadeghian H, Esmacelzadeh A, et al. Distribution of Hepatitis Delta Virus Genotypes in Mashhad, Northeast Iran. *Jundishapur Journal of Microbiology* 2015;8.
33. Hiroshi Sakugawa, Hiroki Nakasone, Tomofumi Nakayoshi, et al. Hepatitis Delta Virus Genotype IIb Predominates in an Endemic Area, Okinawa, Japan. 1999.
34. Y A, M M, M T, et al. Molecular analysis of hepatitis D virus infection in Miyako Island, a small Japanese island. 2000.
35. Watanabe H. Chronic hepatitis delta virus infection with genotype IIb variant is correlated with progressive liver disease. *Journal of General Virology* 2003;84:3275-89.
36. Ma SP. The complete genomic sequence of hepatitis delta virus genotype IIb prevalent in Okinawa, Japan. *Journal of General Virology* 2003;84:461-4.

37. Moriyama M, Taira M, Matsumura H, et al. Full Genomic Analysis of Hepatitis Delta Virus Prevalent on Miyako Island, Japan. *Intervirology* 2005;48:246-54.
38. Kim HS, Kim SJ, Park HW, et al. Prevalence and clinical significance of hepatitis D virus co-infection in patients with chronic hepatitis B in Korea. *J Med Virol* 2011;83:1172-7.
39. Ramia S, El-Zaatari M, Sharara AI, Ramlawi F, Farhat B. Current prevalence of hepatitis delta virus (HDV) infection and the range of HDV genotypes in Lebanon. *Epidemiol Infect* 2007;135:959-62.
40. Takahashi M, Nishizawa T, Gotanda Y, et al. High Prevalence of Antibodies to Hepatitis A and E Viruses and Viremia of Hepatitis B, C, and D Viruses among Apparently Healthy Populations in Mongolia. *Clinical and Vaccine Immunology* 2004;11:392-8.
41. Tsatsralt-Od B, Takahashi M, Nishizawa T, Endo K, Inoue J, Okamoto H. High prevalence of dual or triple infection of hepatitis B, C, and delta viruses among patients with chronic liver disease in Mongolia. *J Med Virol* 2005;77:491-9.
42. Tsatsralt-Od B, Takahashi M, Nishizawa T, Inoue J, Ulaankhuu D, Okamoto H. High prevalence of hepatitis B, C and delta virus infections among blood donors in Mongolia. *Archives of Virology* 2005;150:2513-28.
43. Inoue J, Takahashi M, Nishizawa T, et al. High prevalence of hepatitis delta virus infection detectable by enzyme immunoassay among apparently healthy individuals in Mongolia. *J Med Virol* 2005;76:333-40.
44. Tsatsralt-Od B, Takahashi M, Endo K, et al. Infection with hepatitis A, B, C, and delta viruses among patients with acute hepatitis in Mongolia. *J Med Virol* 2006;78:542-50.
45. Tariq Moatter, Zaigham Abbas, Sabhita Shabir, Jafri W. Clinical presentation and genotype of hepatitis delta in Karachi. 2007.
46. Butt FA, Amin I, Idrees M, Iqbal M. Hepatitis delta virus genotype-1 alone cocirculates with hepatitis B virus genotypes A and D in Pakistan. *European Journal of Gastroenterology & Hepatology* 2014;26:319-24.
47. Khan A, Kurbanov F, Tanaka Y, et al. Epidemiological and clinical evaluation of hepatitis B, hepatitis C, and delta hepatitis viruses in Tajikistan. *Journal of Medical Virology* 2008;80:268-76.
48. Theamboonlers A, Hansurabhanon T, Verachai V, Chongsrisawat V, Poovorawan Y. Hepatitis D Virus Infection in Thailand: HDV Genotyping by RT-PCR, RFLP and Direct Sequencing. *Infection* 2002;30:140-4.
49. A. Obaid Shakil, Stephanos Hadziyannis, Jay H. Hoofnagle, Adrian M. Di Bisceglie, John L. Gerin, Casey JL. Geographic Distribution and Genetic Variability of Hepatitis Delta Virus Genotype I. 1997.
50. Bozdayı AM, Aslan N, Bozdayı G, et al. Molecular epidemiology of hepatitis B, C and D viruses in Turkish patients. *Archives of Virology* 2004;149:2115-29.
51. Çelik İ, Karataylı E, Çevik E, et al. Complete genome sequences and phylogenetic analysis of hepatitis delta viruses isolated from nine Turkish patients. *Archives of Virology* 2011;156:2215-20.
52. Le Gal F, Badur S, Hawajri NA, et al. Current hepatitis delta virus type 1 (HDV1) infections in central and eastern Turkey indicate a wide genetic diversity that is probably linked to different HDV1 origins. *Archives of Virology* 2012;157:647-59.
53. Bulut Y, Bahcecioglu IH, Aygun C, Oner PD, Ozercan I, Demirdag K. High genetic diversity of hepatitis delta virus in eastern Turkey. *The Journal of Infection in Developing Countries* 2014;8.
54. Sy BT, Ratsch BA, Toan NL, et al. High prevalence and significance of hepatitis D virus infection

- among treatment-naive HBsAg-positive patients in Northern Vietnam. *PLoS One* 2013;8:e78094.
55. Naomi Hall, Linh Nguyen Thuy, Trinh Do Thi Diem, et al. High Prevalence of Hepatitis Delta Virus among Persons Who Inject Drugs, Vietnam. 2015.
  56. Valeria Ivaniushina, Nadjia Radjef, Marfa Alexeeva, et al. Hepatitis delta virus genotypes I and II cocirculate in an endemic area of Yakutia, Russia. 2001.
  57. Servant-Delmas A, Le Gal F, Gallian P, Gordien E, Laperche S. Increasing prevalence of HDV/HBV infection over 15 years in France. *J Clin Virol* 2014;59:126-8.
  58. GRAZIA A. NIRO, ANTONINA SMEDILE, ANGELO ANDRIULLI, MARIO RIZZETTO, JOHN L. GERIN, CASEY JL. The Predominance of Hepatitis Delta Virus Genotype I Among Chronically Infected Italian Patients. 1996.
  59. Bielawski KP, Zietkowski D, Charmuszko U, Sikorska K, Stalke P. Hepatitis delta virus infection in chronically HBV-infected patients from northern Poland. *Arch Virol* 2006;151:1207-15.
  60. Popescu GA, Otelea D, Gavrieliu LC, et al. Epidemiology of hepatitis D in patients infected with hepatitis B virus in bucharest: a cross-sectional study. *J Med Virol* 2013;85:769-74.
  61. E F, S B, M K, et al. Recent High Incidence of Fulminant Hepatitis in Samara, Russia: Molecular Analysis of Prevailing Hepatitis B and D Virus Strains. 2000.
  62. Montserrat Cotrina, Maria Buti, Rosendo Jardi, et al. Hepatitis delta genotypes in chronic delta infection in the northeast of Spain (Catalonia). 1998.
  63. Beguelin C, Moradpour D, Sahli R, et al. Hepatitis delta-associated mortality in HIV/HDV-coinfected patients. *J Hepatol* 2017;66:297-303.
  64. Shang D, Hughes SA, Horner M, et al. Development and validation of an efficient in-house real-time reverse transcription polymerase chain reaction assay for the quantitative detection of serum hepatitis delta virus RNA in a diverse South London population. *Journal of Virological Methods* 2012;184:55-62.
  65. Rosenberg GK, Lattimore S, Brailsford SR, et al. The diversity of chronic hepatitis B virus infections within blood donors in England and North Wales 2005 through 2010. *Transfusion* 2013;53:2467-76.
  66. El Bouzidi K, Elamin W, Kranzer K, et al. Hepatitis delta virus testing, epidemiology and management: a multicentre cross-sectional study of patients in London. *J Clin Virol* 2015;66:33-7.
  67. BSc VP, MD DBM, PhD ÉF, PhD J-PP. A Canadian isolate of hepatitis D (delta) virus. 1999.
  68. Han M, Littlejohn M, Yuen L, et al. Molecular epidemiology of hepatitis delta virus in the Western Pacific region. *J Clin Virol* 2014;61:34-9.
  69. Raymundo P, Alan K, Felix M, et al. HDV genotypes in the Western Brazilian Amazon region: A preliminary report. 2006.
  70. Gomes-Gouvea MS, Soares MCP, Bensabath G, et al. Hepatitis B virus and hepatitis delta virus genotypes in outbreaks of fulminant hepatitis (Labrea black fever) in the western Brazilian Amazon region. *Journal of General Virology* 2009;90:2638-43.
  71. Barros LMF, Gomes-Gouvêa MS, Pinho JRR, et al. Hepatitis Delta virus genotype 8 infection in Northeast Brazil: Inheritance from African slaves? *Virus Research* 2011;160:333-9.
  72. Mendes-Correa MC, Gomes-Gouvea MS, Alvarado-Mora MV, et al. Hepatitis delta in HIV/HDV co-infected patients in Brazil: is it important? *Int J Infect Dis* 2011;15:e828-32.
  73. Kay A, Melo da Silva E, Pedreira H, et al. HBV/HDV co-infection in the Western Brazilian Amazonia: an intriguing mutation among HDV genotype 3 carriers. *Journal of Viral Hepatitis* 2014;21:921-4.

74. Crispim MAE, Fraiji NA, Campello SC, Schriefer NA, Stefani MMA, Kiesslich D. Molecular epidemiology of hepatitis B and hepatitis delta viruses circulating in the Western Amazon region, North Brazil. 2014.
75. Botelho-Souza LF, Souza Vieira D, de Oliveira dos Santos A, Cunha Pereira AV, Villalobos-Salcedo JM. Characterization of the Genotypic Profile of Hepatitis Delta Virus: Isolation of HDV Genotype-1 in the Western Amazon Region of Brazil. *Intervirol* 2015;58:166-71.
76. Santos MDC, Gomes-Gouvêa MS, Nunes JDC, et al. The hepatitis delta genotype 8 in Northeast Brazil: The North Atlantic slave trade as the potential route for infection. *Virus Research* 2016;224:6-11.
77. Alvarado-Mora MV, Romano CM, Gomes-Gouvêa MS, Gutierrez MF, Carrilho FJ, Pinho JRR. Dynamics of Hepatitis D (delta) virus genotype 3 in the Amazon region of South America. *Infection, Genetics and Evolution* 2011;11:1462-8.
78. di Filippo Villa D, Cortes-Mancera F, Payares E, et al. Hepatitis D virus and hepatitis B virus infection in Amerindian communities of the Amazonas state, Colombia. *Virol J* 2015;12:172.
79. John L. Casey, Grazia A. Niro, Ronald E. Engle, et al. Hepatitis B Virus (HBV)/Hepatitis D Virus (HDV) Coinfection in Outbreaks of Acute Hepatitis in the Peruvian Amazon Basin: The Roles of HDV Genotype III and HBV Genotype F. 1996.
80. Tatsunori Nakano, Craig N. Shapiro, Stephan C. Hadler, et al. Characterization of hepatitis D virus genotype III among Yucpa Indians in Venezuela. 2001.
81. Alberto Quintero, Nathalie UzcaÂ tegui, Carmen Luisa Loureiro, et al. Hepatitis Delta Virus Genotypes I and III Circulate Associated With Hepatitis B Virus Genotype F In Venezuela. 2001.
